# Supplementary material for: Scalable Synthesis and Cancer Cell Cytotoxicity of Rooperol and Analogues
Source: MDPI journal article supplement (doi:10.3390/molecules27061792), 2022-03-09

## Supporting Information

# Scalable Synthesis and Cancer Cell Cytotoxicity of Rooperol and Analogues.

Zachary T. Schwartz<sup>1§</sup>, Peter D. Theisen<sup>1‡§</sup>, Olaf T. Bjornstahl<sup>2</sup>, Mary Rodebaugh<sup>1</sup>, Mauricio A. Jemal<sup>1,3</sup>, Dallas Lee<sup>1</sup>, Spencer D. Shelton<sup>1</sup>, Zhenze Zhao<sup>1</sup>, Liqin Du<sup>1</sup>, and Sean M. Kerwin<sup>1,2,3\*</sup>

<sup>1</sup> Dept. of Chemistry & Biochemistry, Texas State University, San Marcos, TX 78666

<sup>2</sup> Division of Chemical Biology and Medicinal Chemistry, University of Texas at Austin, Austin, TX, 78712

<sup>3</sup> Materials Science, Engineering, and Commercialization Program, Texas State University, San Marcos, TX, 78666

‡ Deceased August 27, 2018

§ These authors made equal contributions to the work.

\* Correspondence: smk89@txstate.edu; Tel.: +1 5122452056

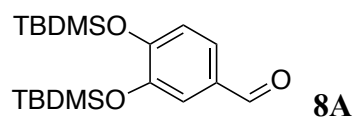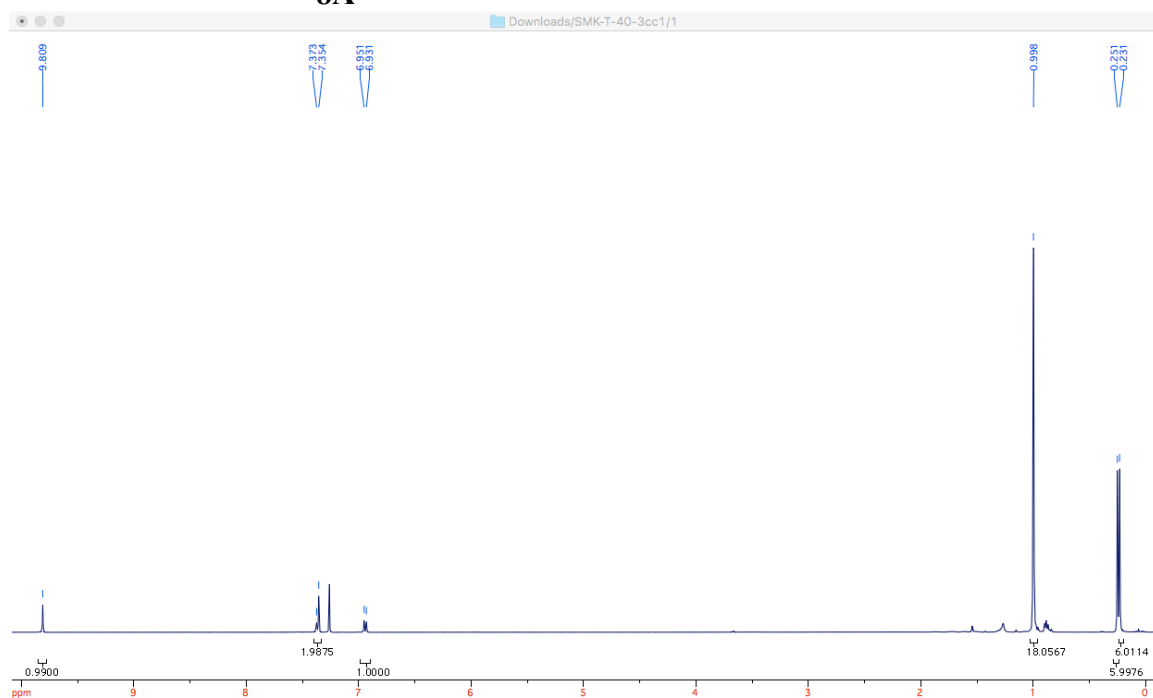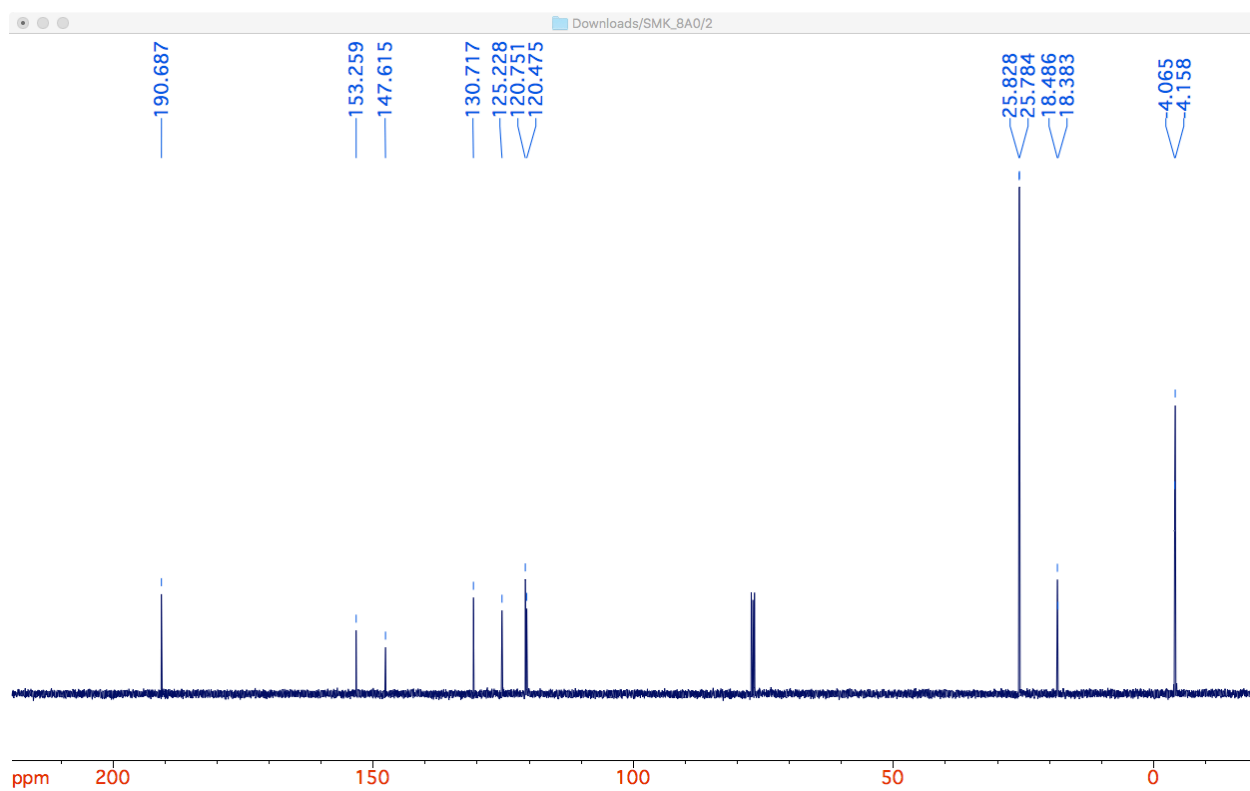

Spectrum RT 1.07 - 1.25 (15 scans) - Background Subtracted 0.00 - 1.07  
SMK-8A0 2021.11.12 14:15:33 ;  
APCI + Max: 1.8E9

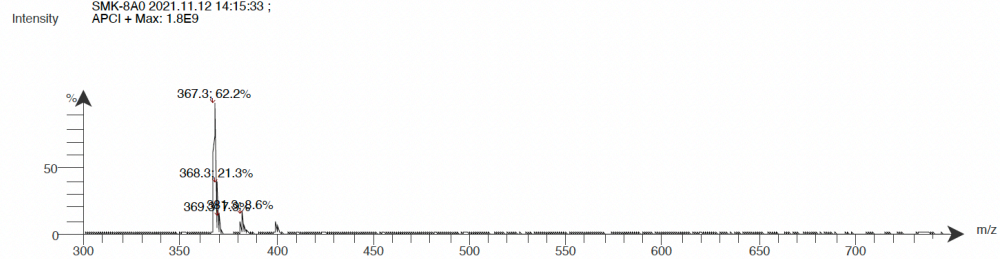

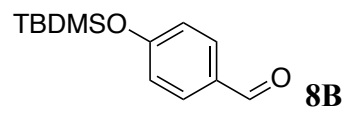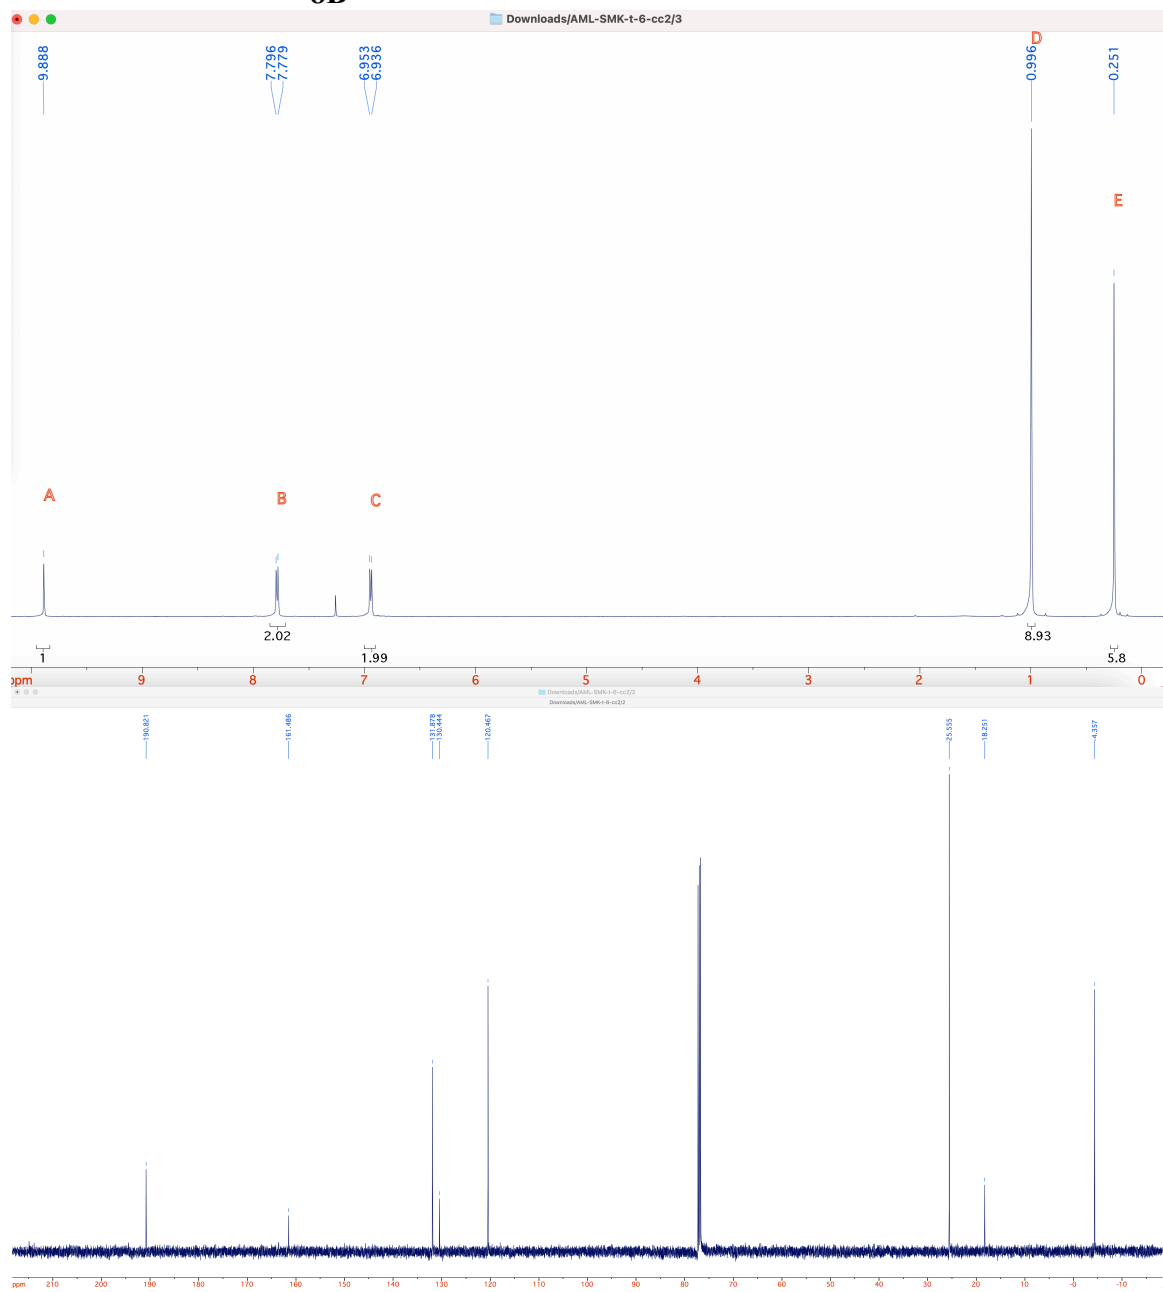

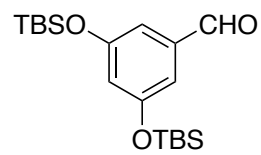

8C

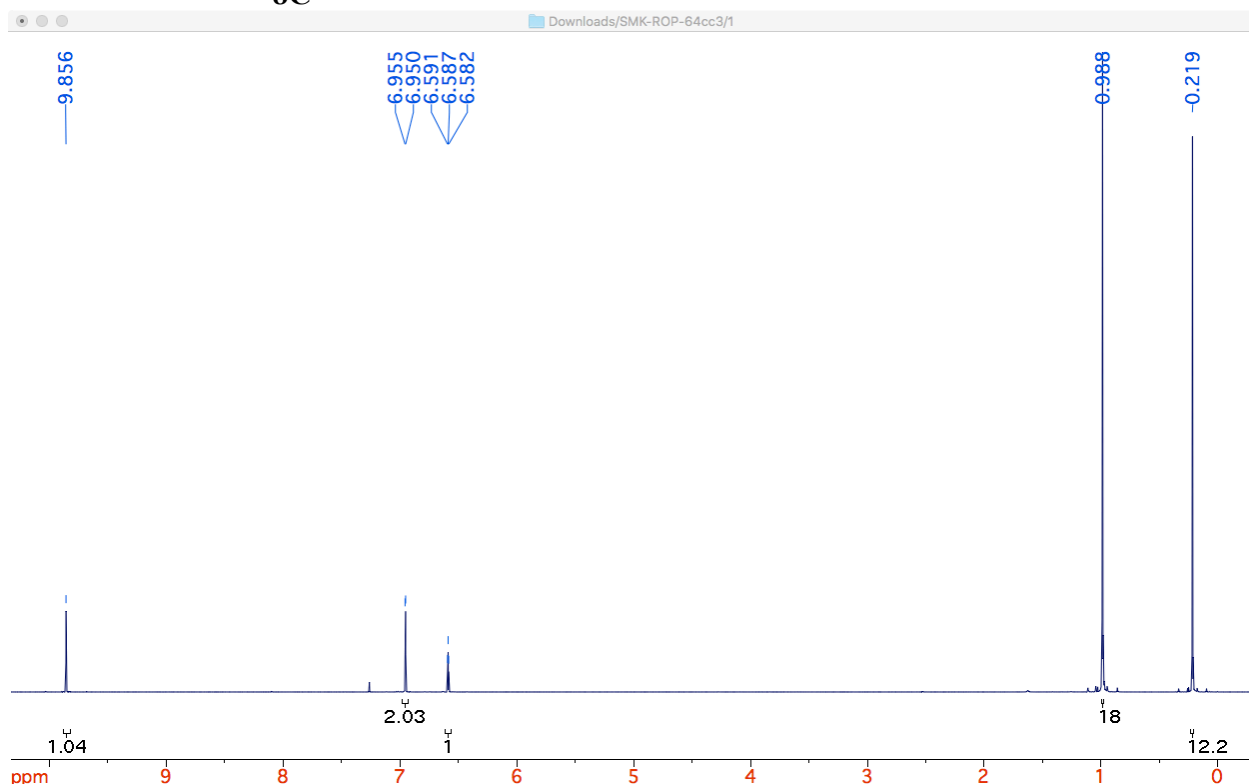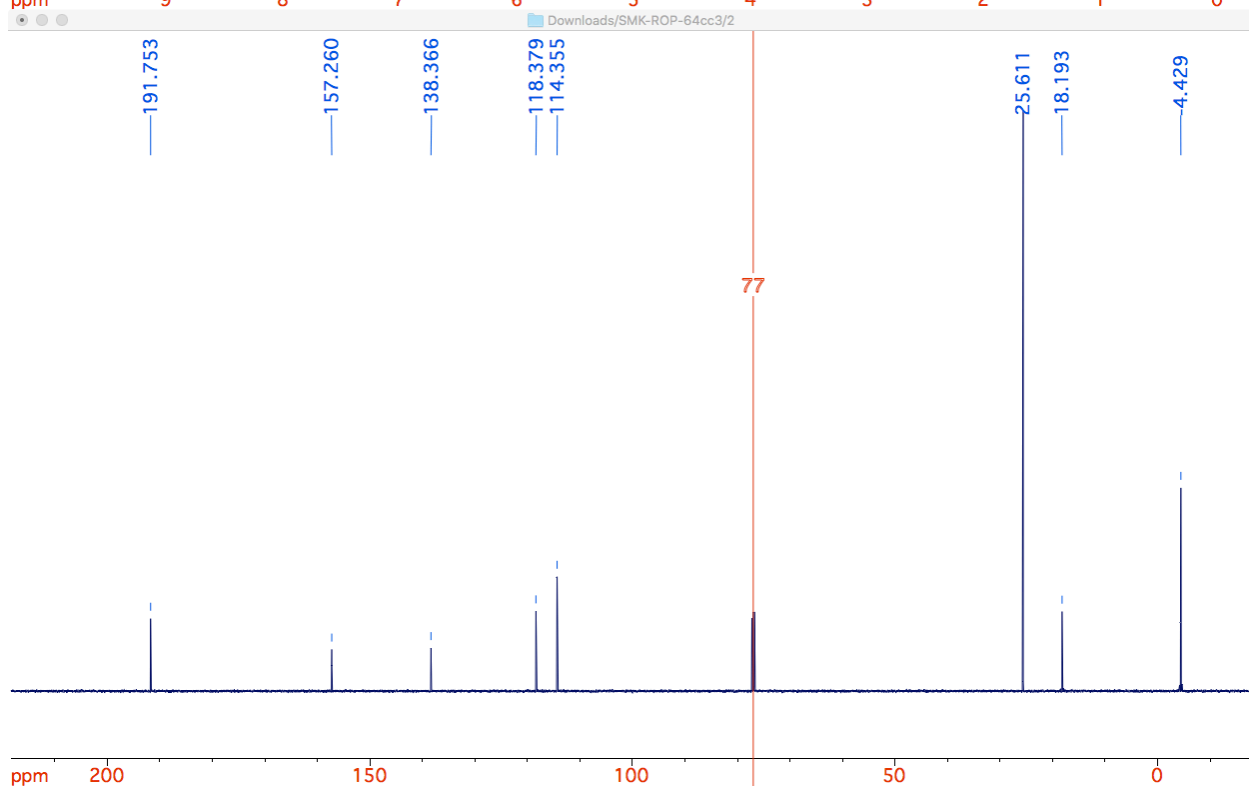

Spectrum RT 1.08 - 1.26 (13 scans) - Background Subtracted 0.00 - 1.08  
SMK-POP-64-8A4\_APCI\_inj1 2021.11.12 15:53:49 ;  
Intensity APCI + Max: 1.6E9

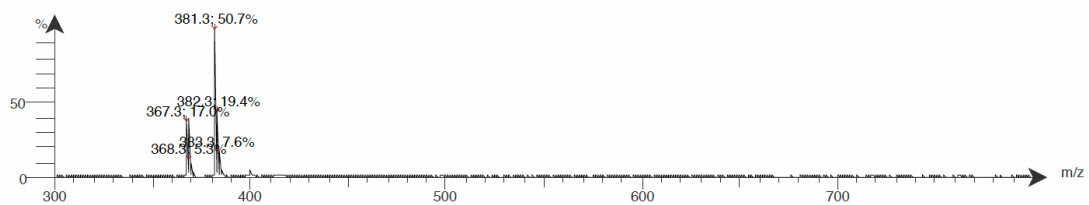

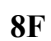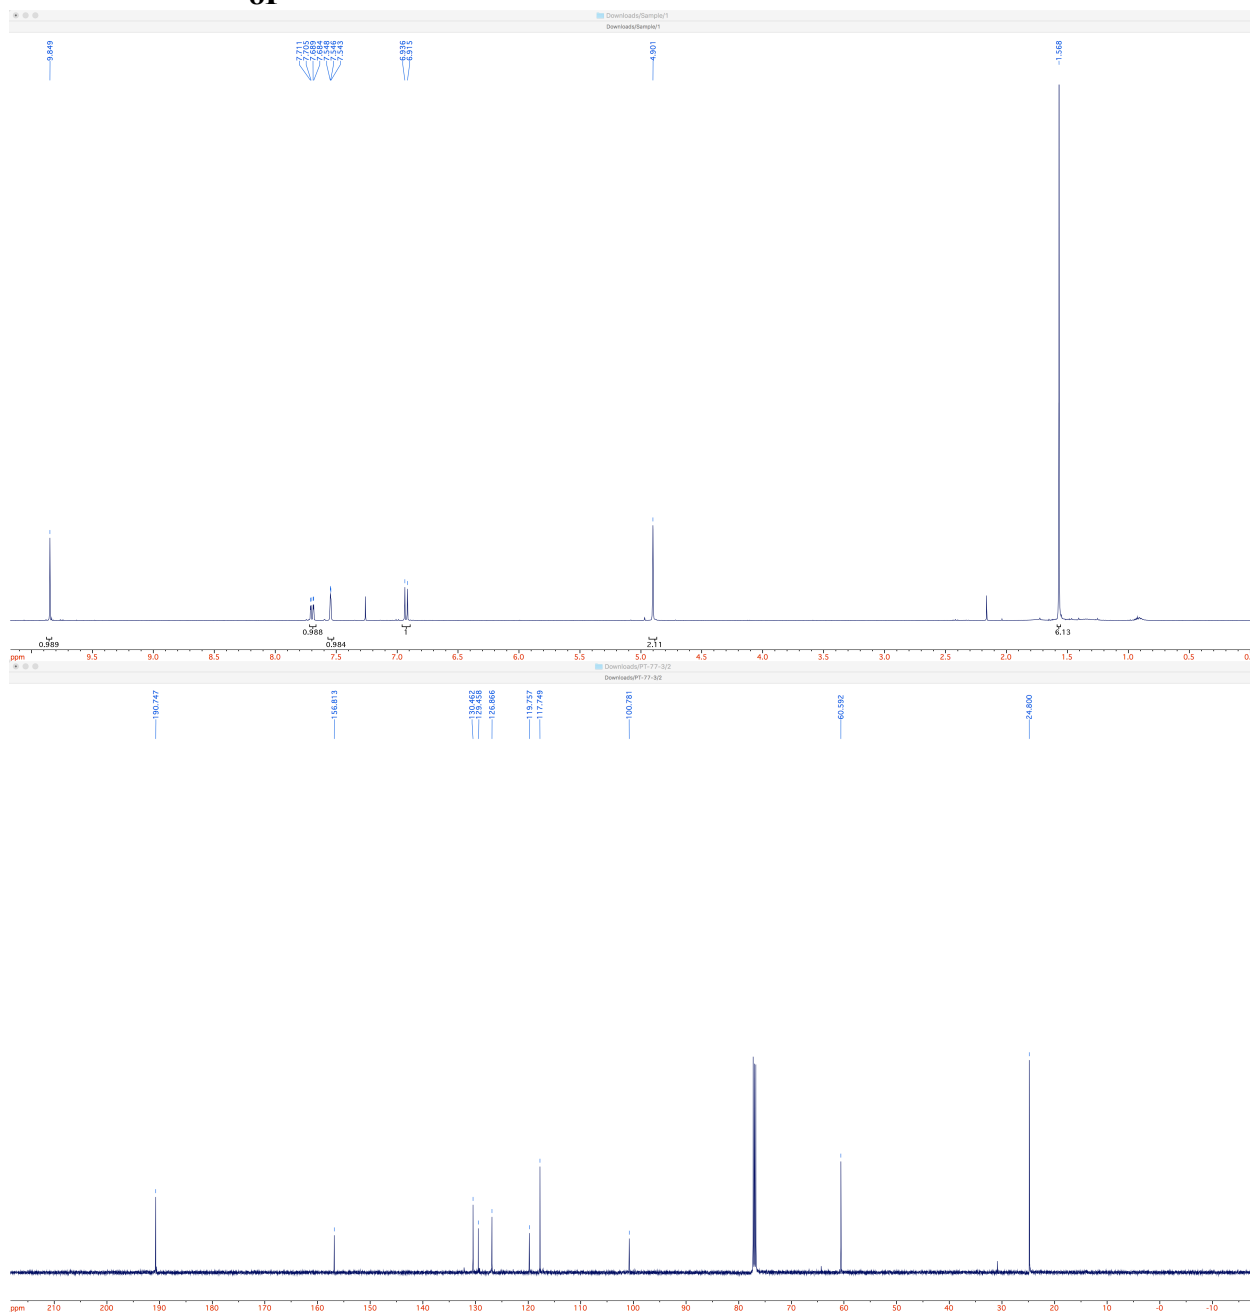

Background RT 1.06 - 1.22 (29 scans)  
PT-83-4\_8C4\_inj3.datx 2021.10.29 11:46:57 ;  
ESI + Max: 2E8

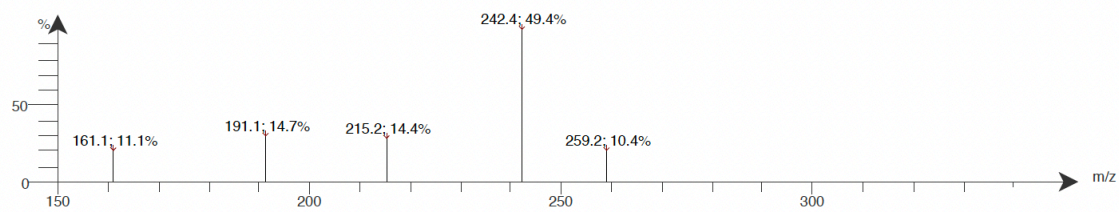

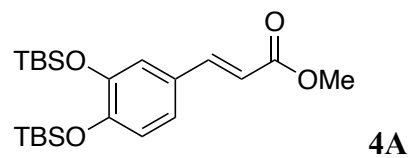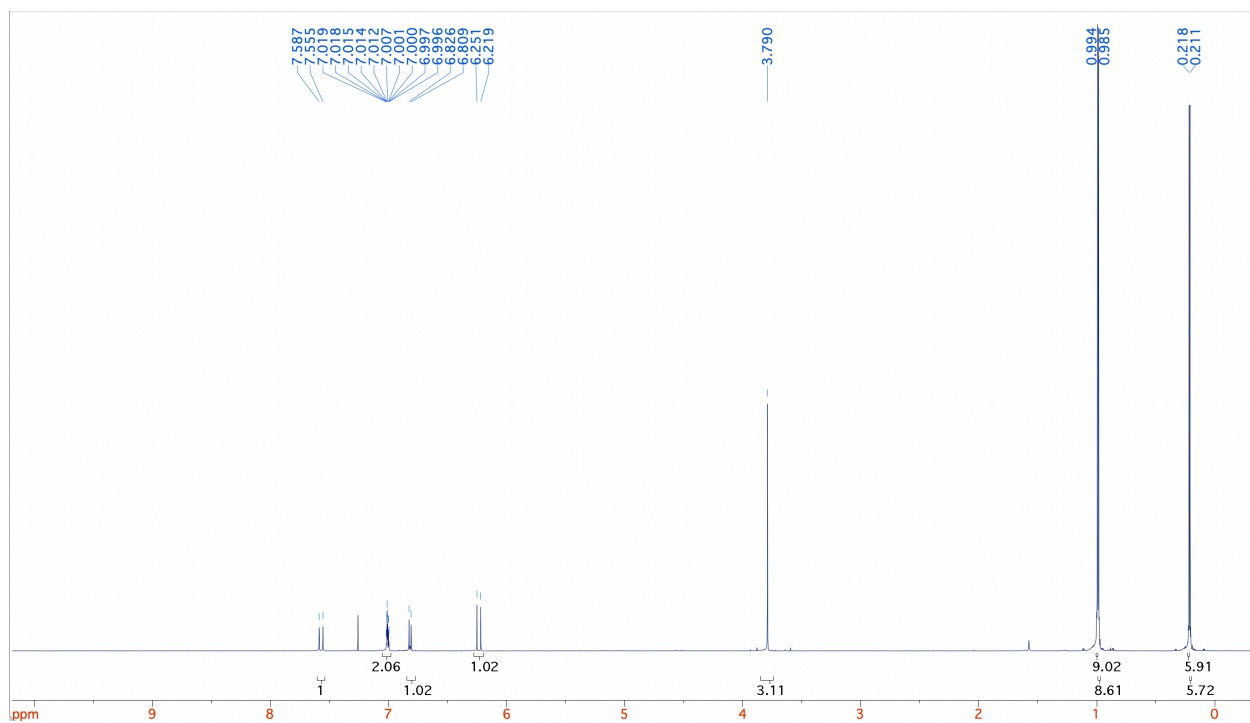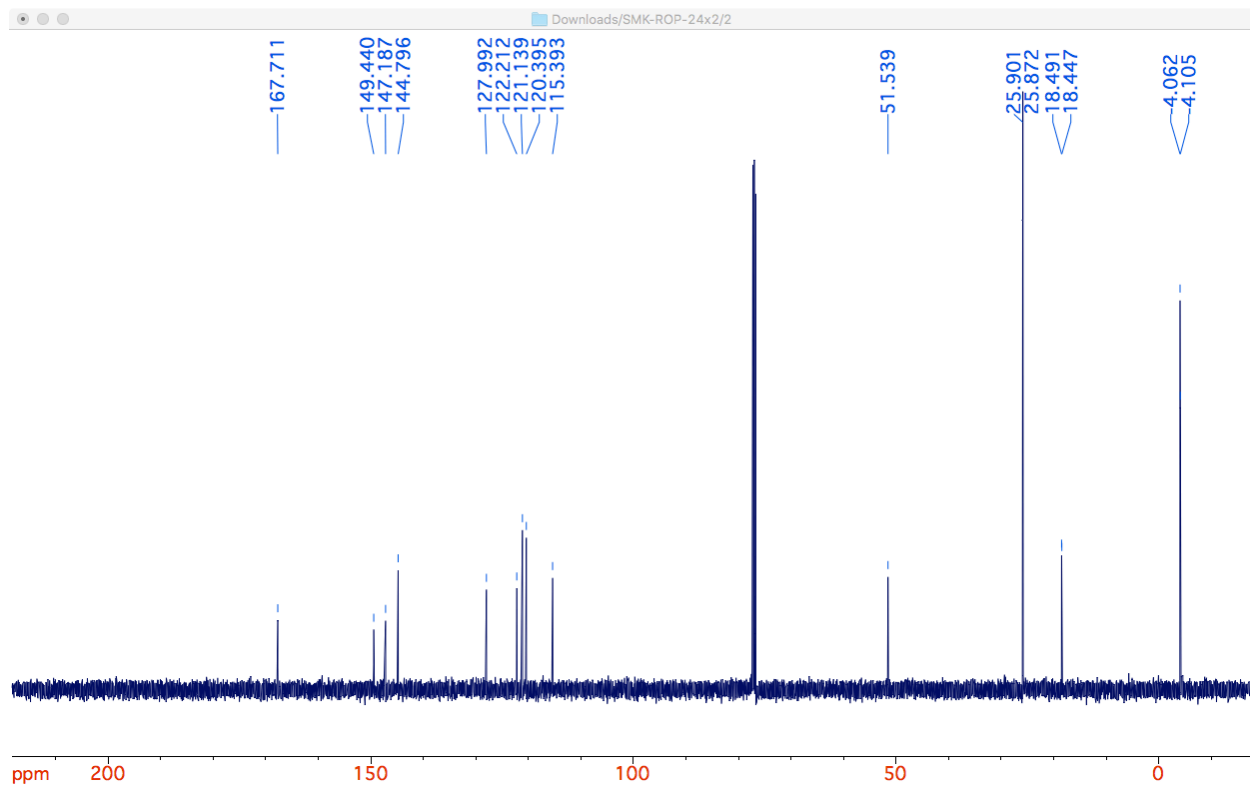

Background RT 0.99 - 1.17 (24 scans)  
ZTS-W-7.2\_4primeA0\_APCI\_inj1.datx 2021.11.30 17:43:36 ;  
APCI + Max: 1.1E9

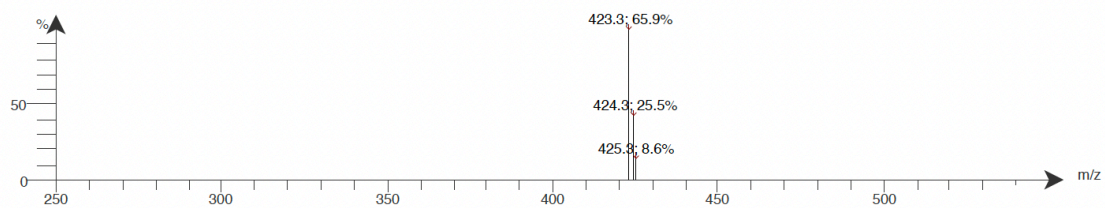

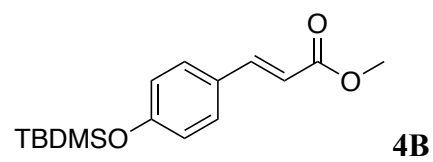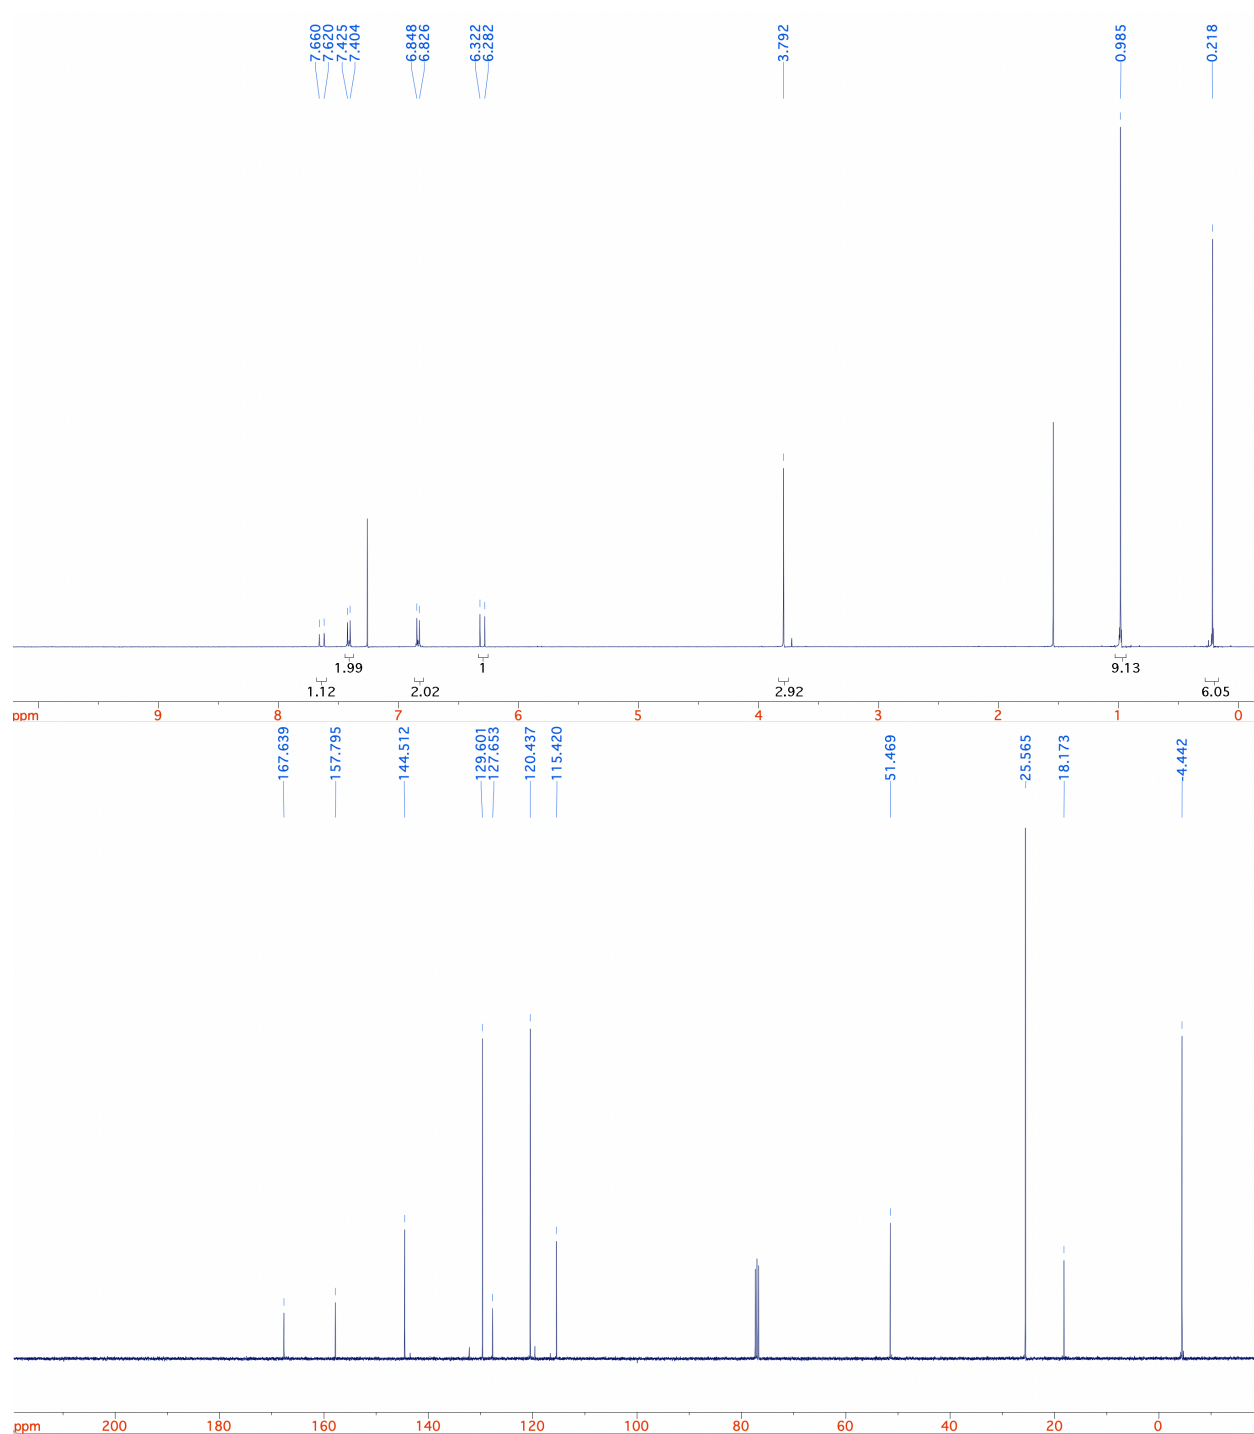

Background RT 1.20 - 1.51 (34 scans)  
SMK-T-9ML\_4\_A1\_inj1.dabx 2021.11.11 12:14:05 ;  
ESI + Max: 6.8E8

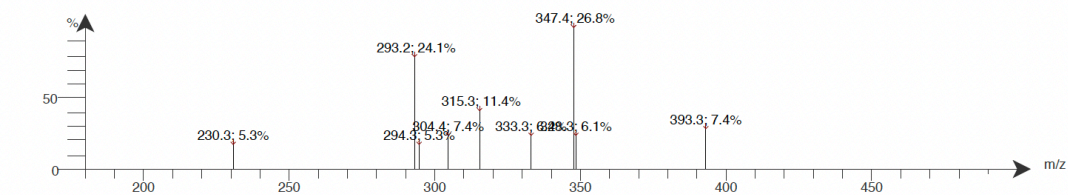

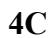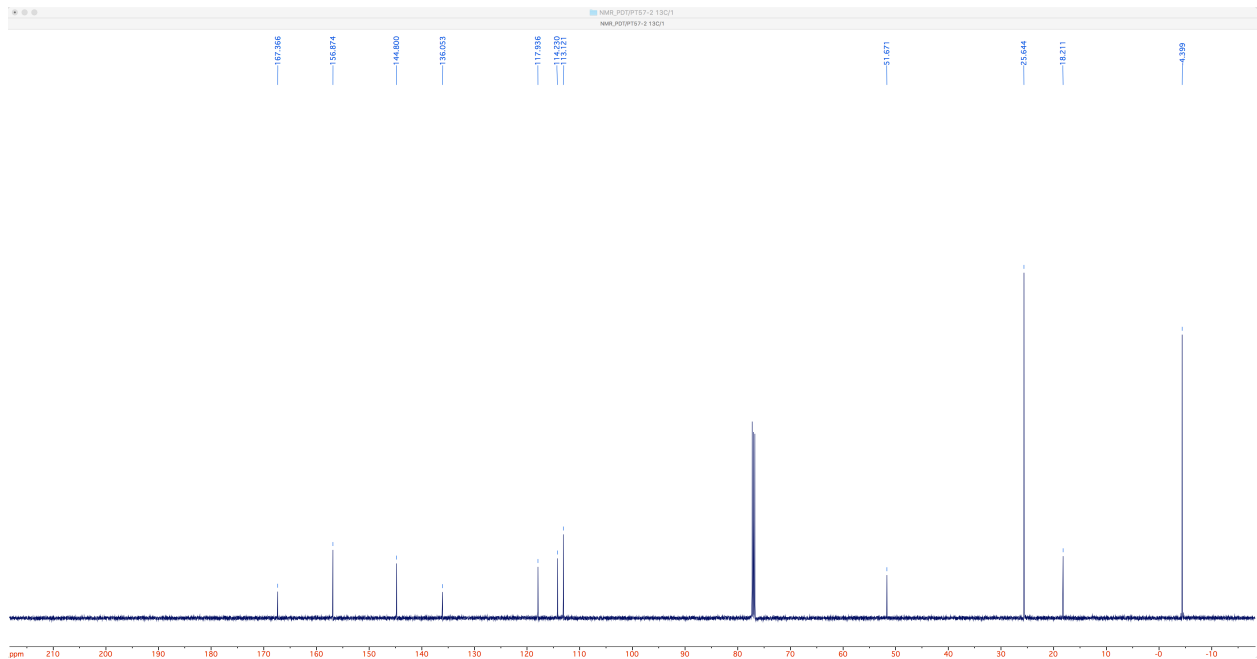

Spectrum RT 1.07 - 1.30 (17 scans) - Background Subtracted 0.00 - 1.07  
KeMIS\_188A\_ACPL\_inj1 2021.11.12 13:59:30 ;  
APCI + Max: 1.9E9

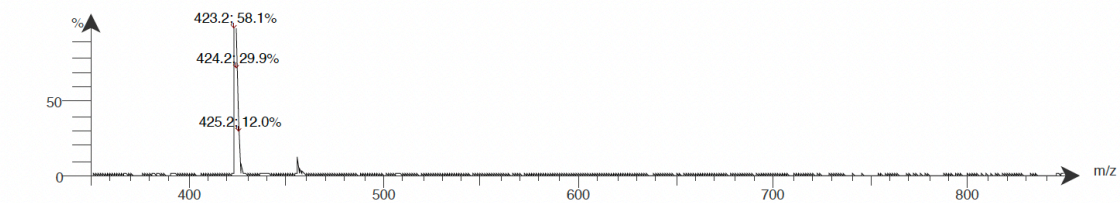

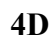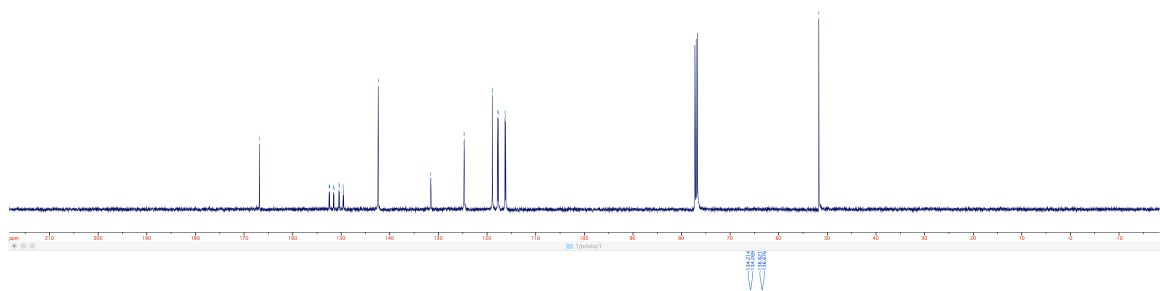

Background RT 0.90 - 1.03 (25 scans)  
OTB-C-45P\_APCI3.datx 2021.11.11 14:57:41 ;  
Intensity APCI +

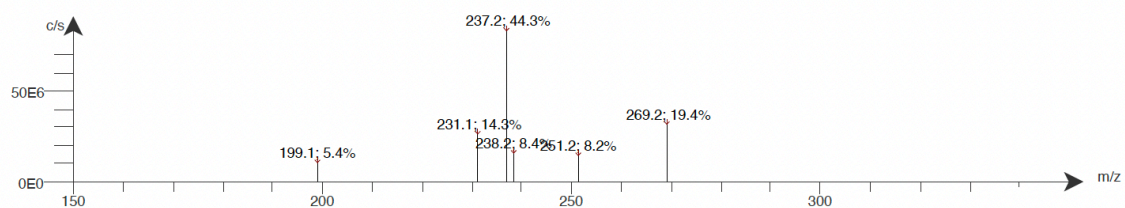

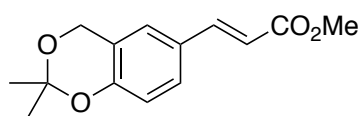

**4F**

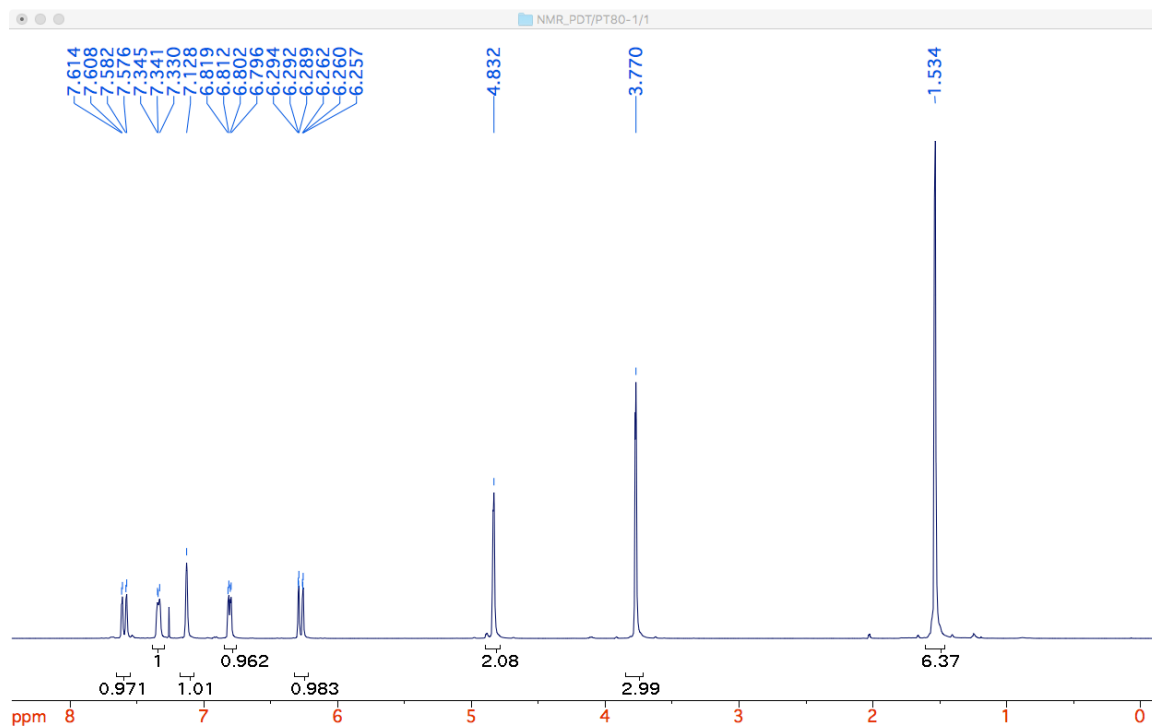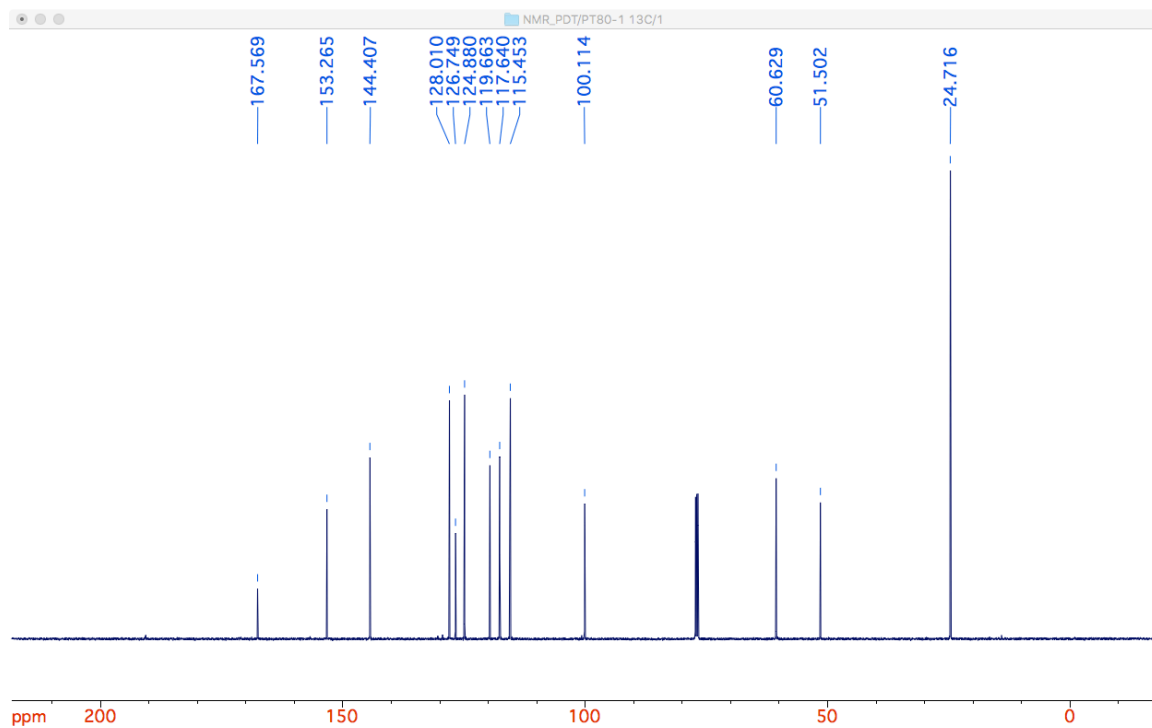

Background RT 1.05 - 1.21 (29 scans)  
PT80-2-4\_C3\_inj1.datx 2021.10.26 17:33:08 ;  
ESI +

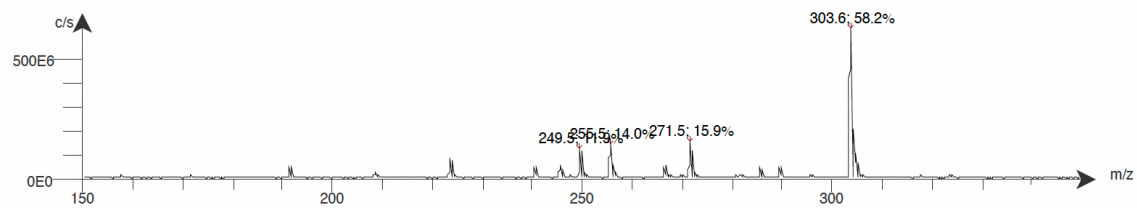

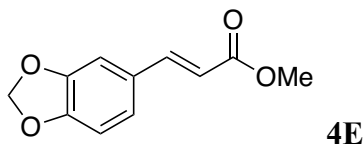

OTB-C-49PF//1H; CDC13//17JUL2016

Sample Name:  
OTB-C-49PF  
Data Collected on:  
nmr6b-mercury400  
Archive directory:  
/home/space/data  
Sample directory:  
OTB-C-49PF\_20160717\_01  
FidFile: PROTON

Pulse Sequence: PROTON (s2pul)  
Solvent: cdcl3  
Data collected on: Jul 17 2016

Operator: kerwin

Relax. delay 1.000 sec  
Pulse 45.0 degrees  
Acq. time 2.558 sec  
Width 6406.1 Hz  
16 repetitions  
OBSERVE H1, 400.4437673 MHz  
DATA PROCESSING  
FT size 32768  
Total time 0 min 57 sec

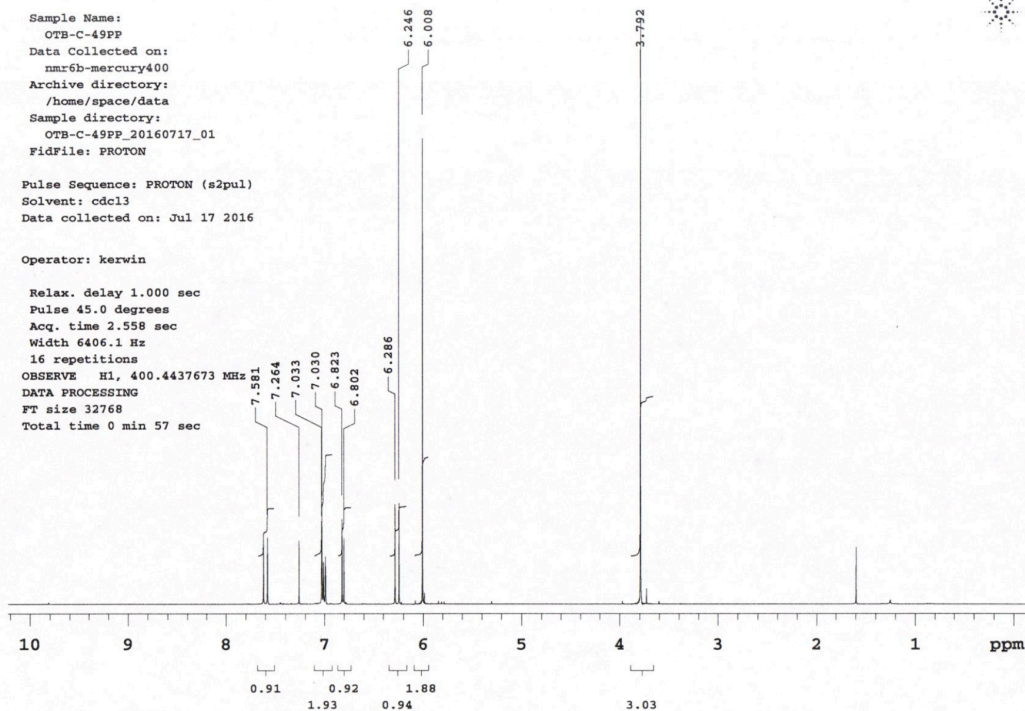

Agilent Technologies

OTB-C-49PF

Sample Name:  
OTB-C-49PF  
Data Collected on:  
nmr6b-mercury400  
Archive directory:  
/home/space/data  
Sample directory:  
OTB-C-49PF\_20160717\_01  
FidFile: CARBON\_01

Pulse Sequence: CARBON (s2pul)  
Solvent: cdcl3  
Data collected on: Jul 17 2016

Operator: kerwin

Relax. delay 2.000 sec  
Pulse 30.0 degrees  
Acq. time 1.301 sec  
Width 25188.9 Hz  
256 repetitions  
OBSERVE C13, 100.6916659 MHz  
DECOUPLE H1, 400.4458059 MHz  
Power 38 dB  
continuously on  
WALTZ-16 modulated  
DATA PROCESSING  
Line broadening 0.5 Hz  
FT size 65536  
Total time 14 min

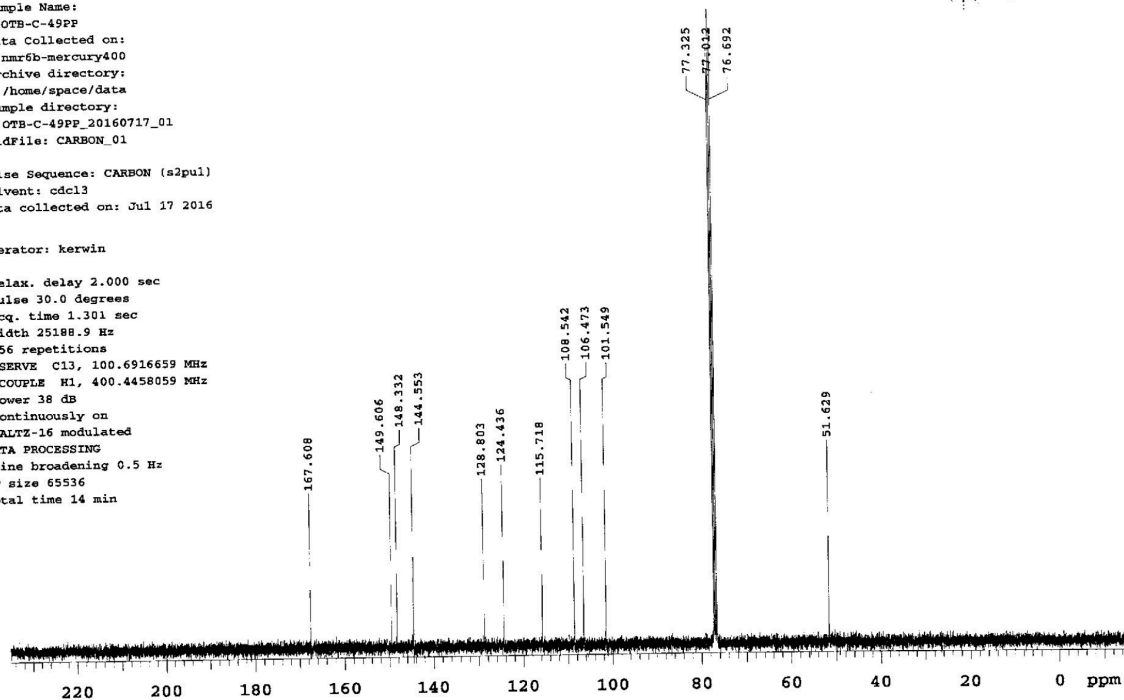

Agilent Technologies

Intensity

Background RT 1.07 - 1.28 {36 scans}  
SMK-4primeC5\_ESIpos\_inj1.datx 2021.12.09 14:10:11 ;  
ESI +

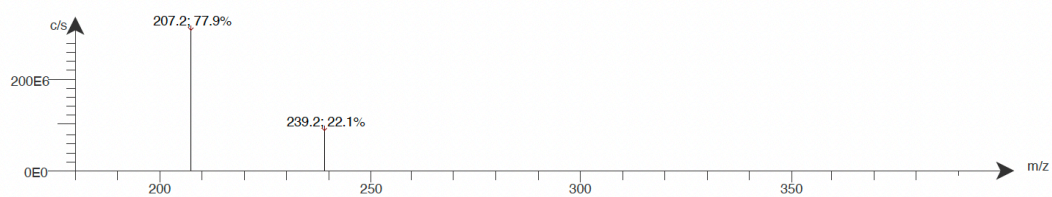

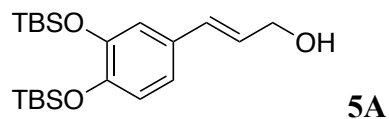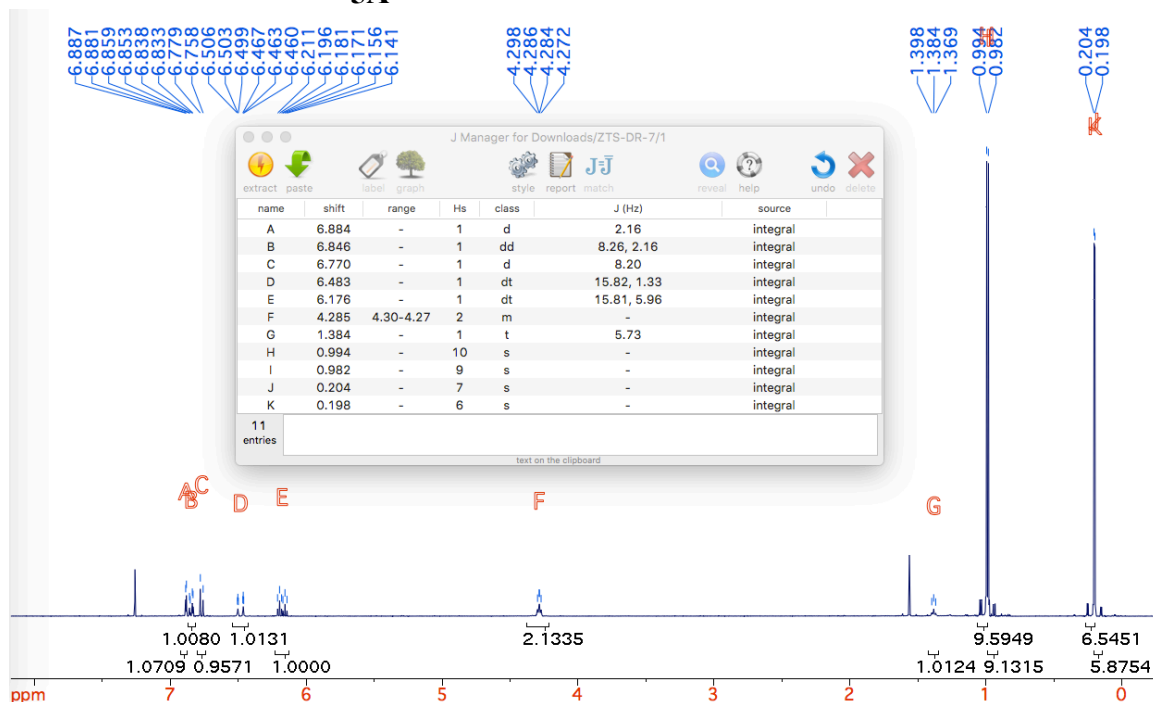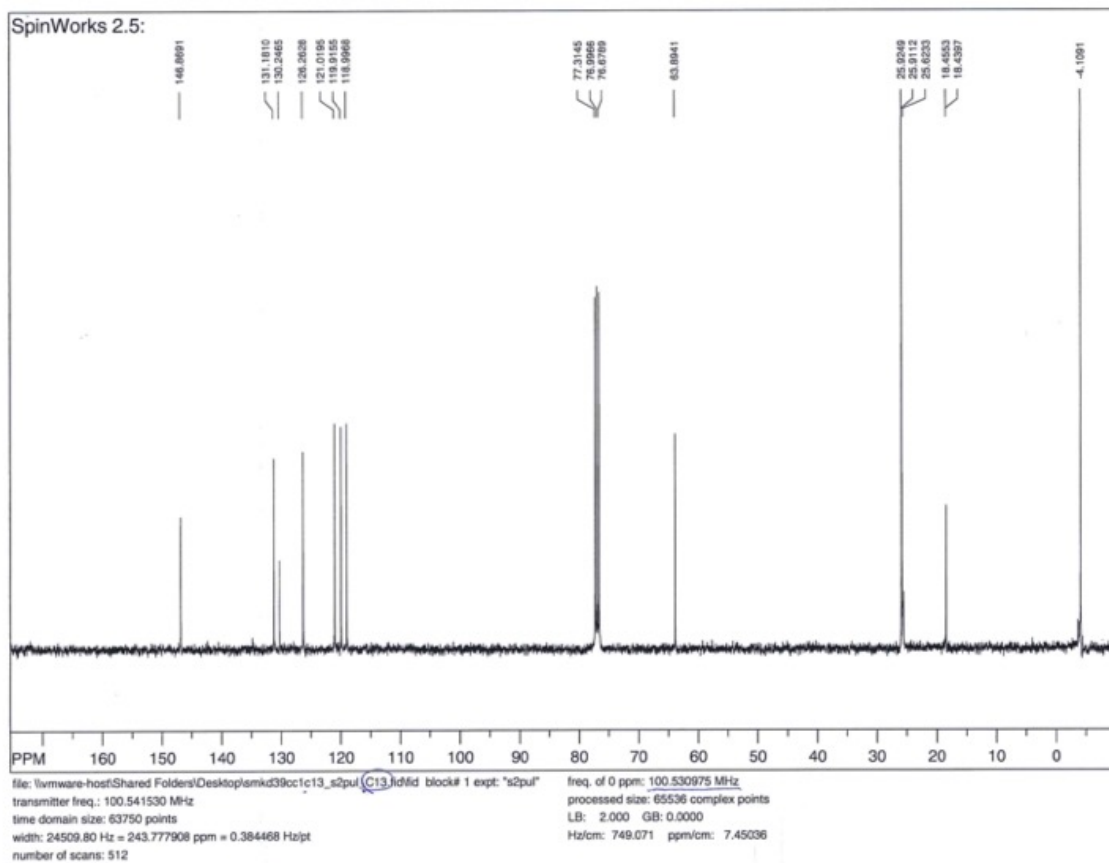

x10<sup>3</sup> +ESI Scan (0.197-0.230 min, 3 Scans) Frag=220.0V MSF13-1817\_SMKD111cp\_hfESIpoe2.d Subtract

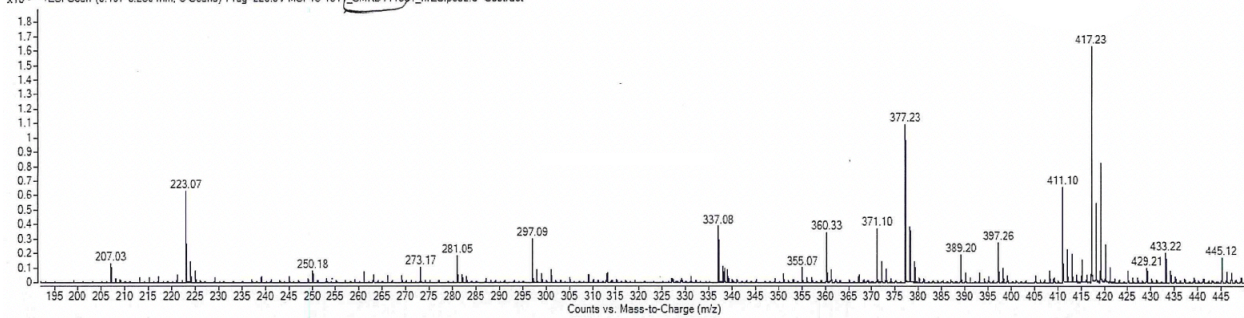

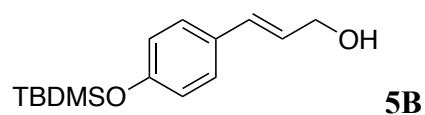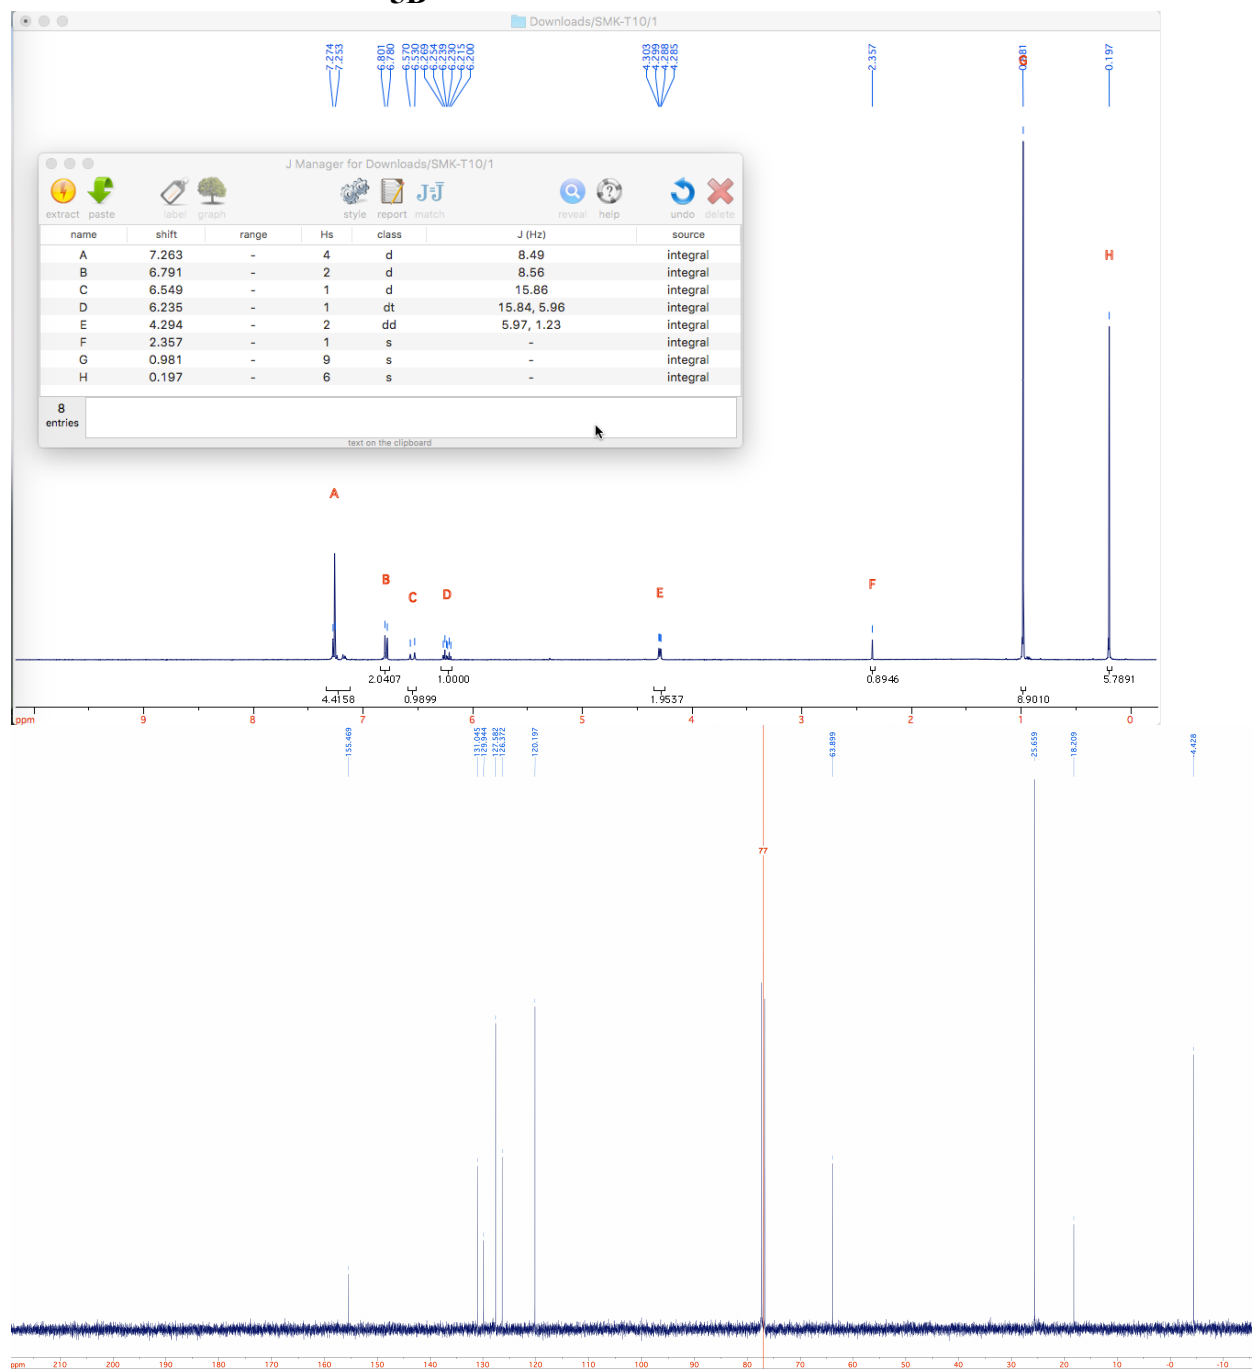

Background RT 1.03 - 1.40 (90 scans)  
SMK-4A1\_APCI\_Inj1.datx 2021.11.19 13:03:54 ;  
APCI + Max: 1.5E9

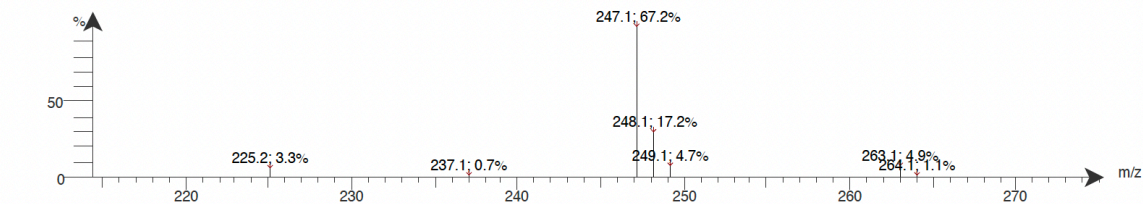

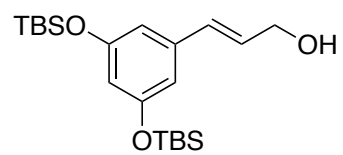

5C

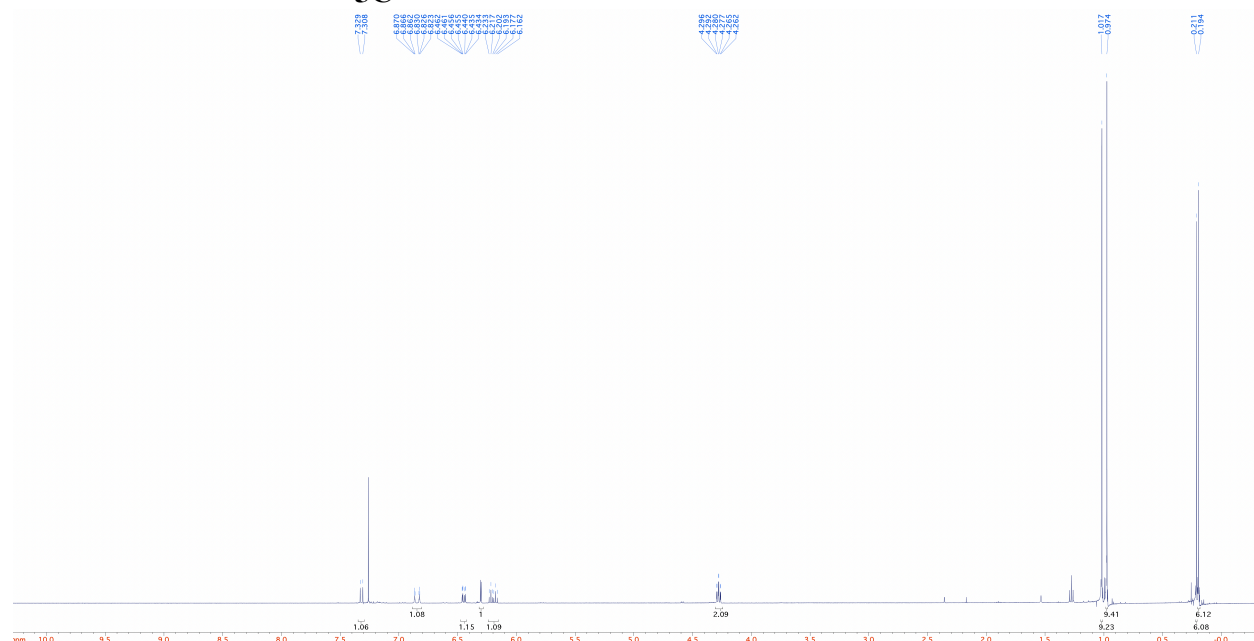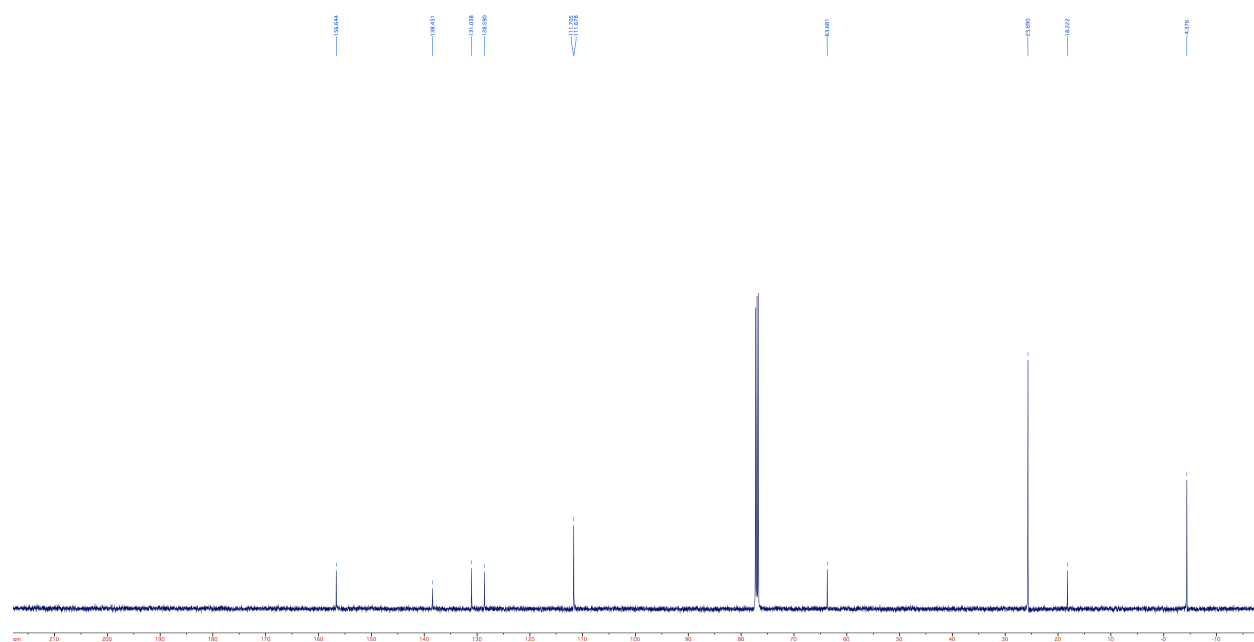

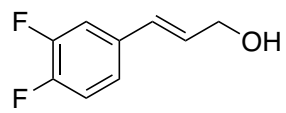

5D

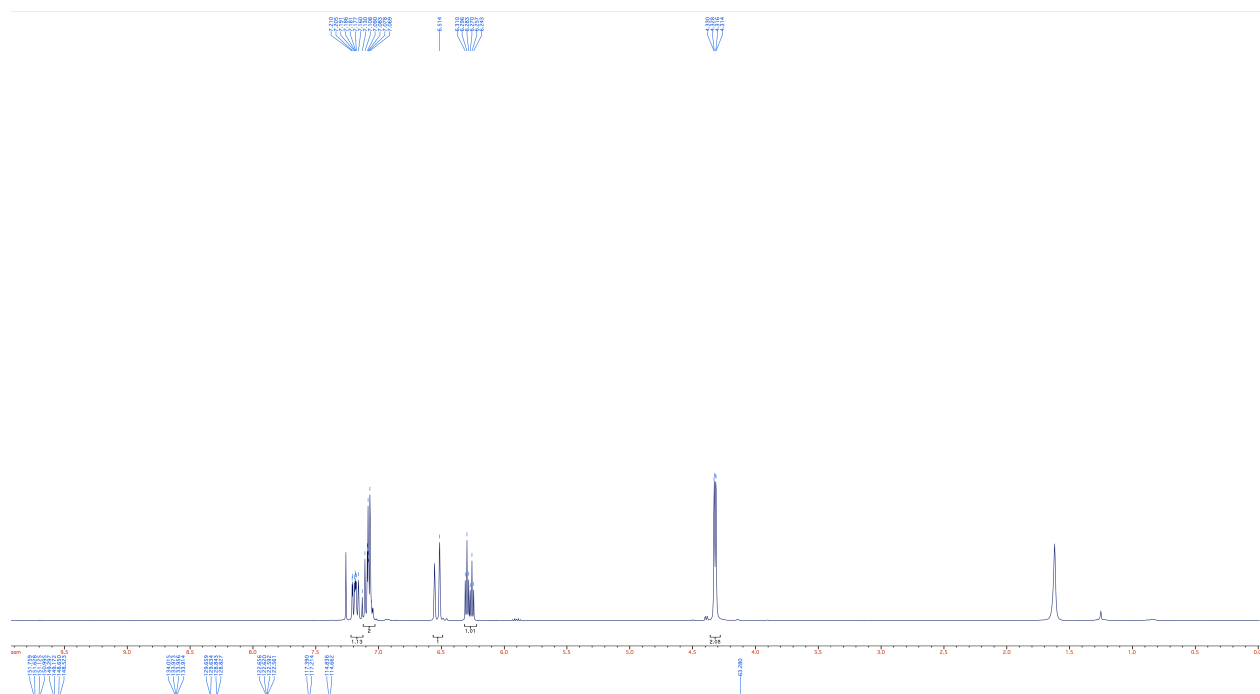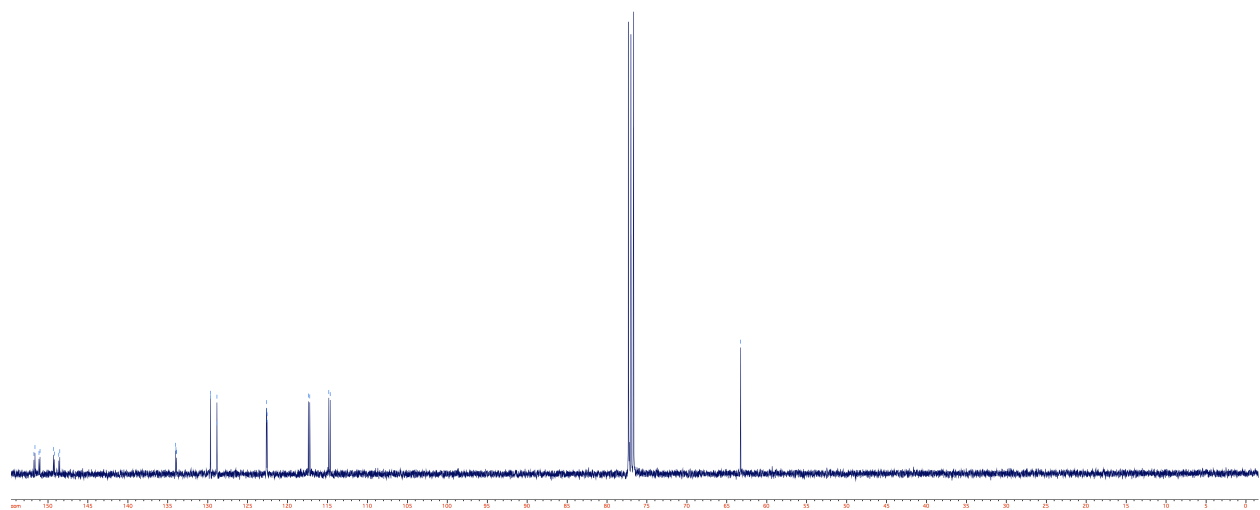

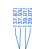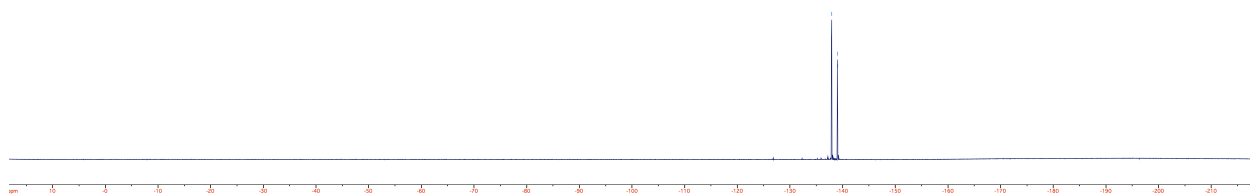

Background RT 1.10 - 1.24 (25 scans)  
OTB-C-96p-4B4\_inj1.datx 2021.10.26 17:24:37 ;  
ESI +

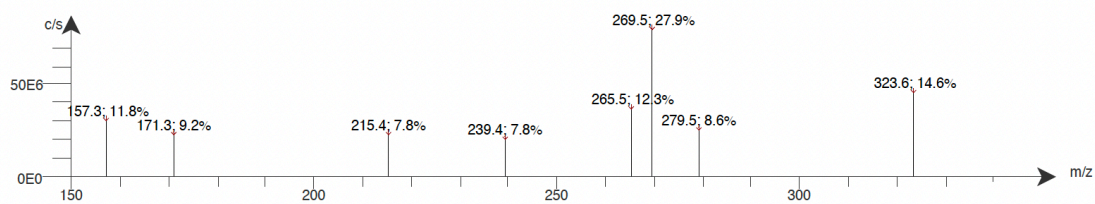

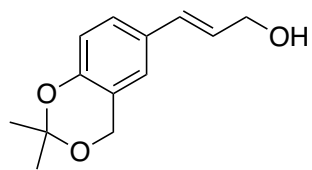

**5F**

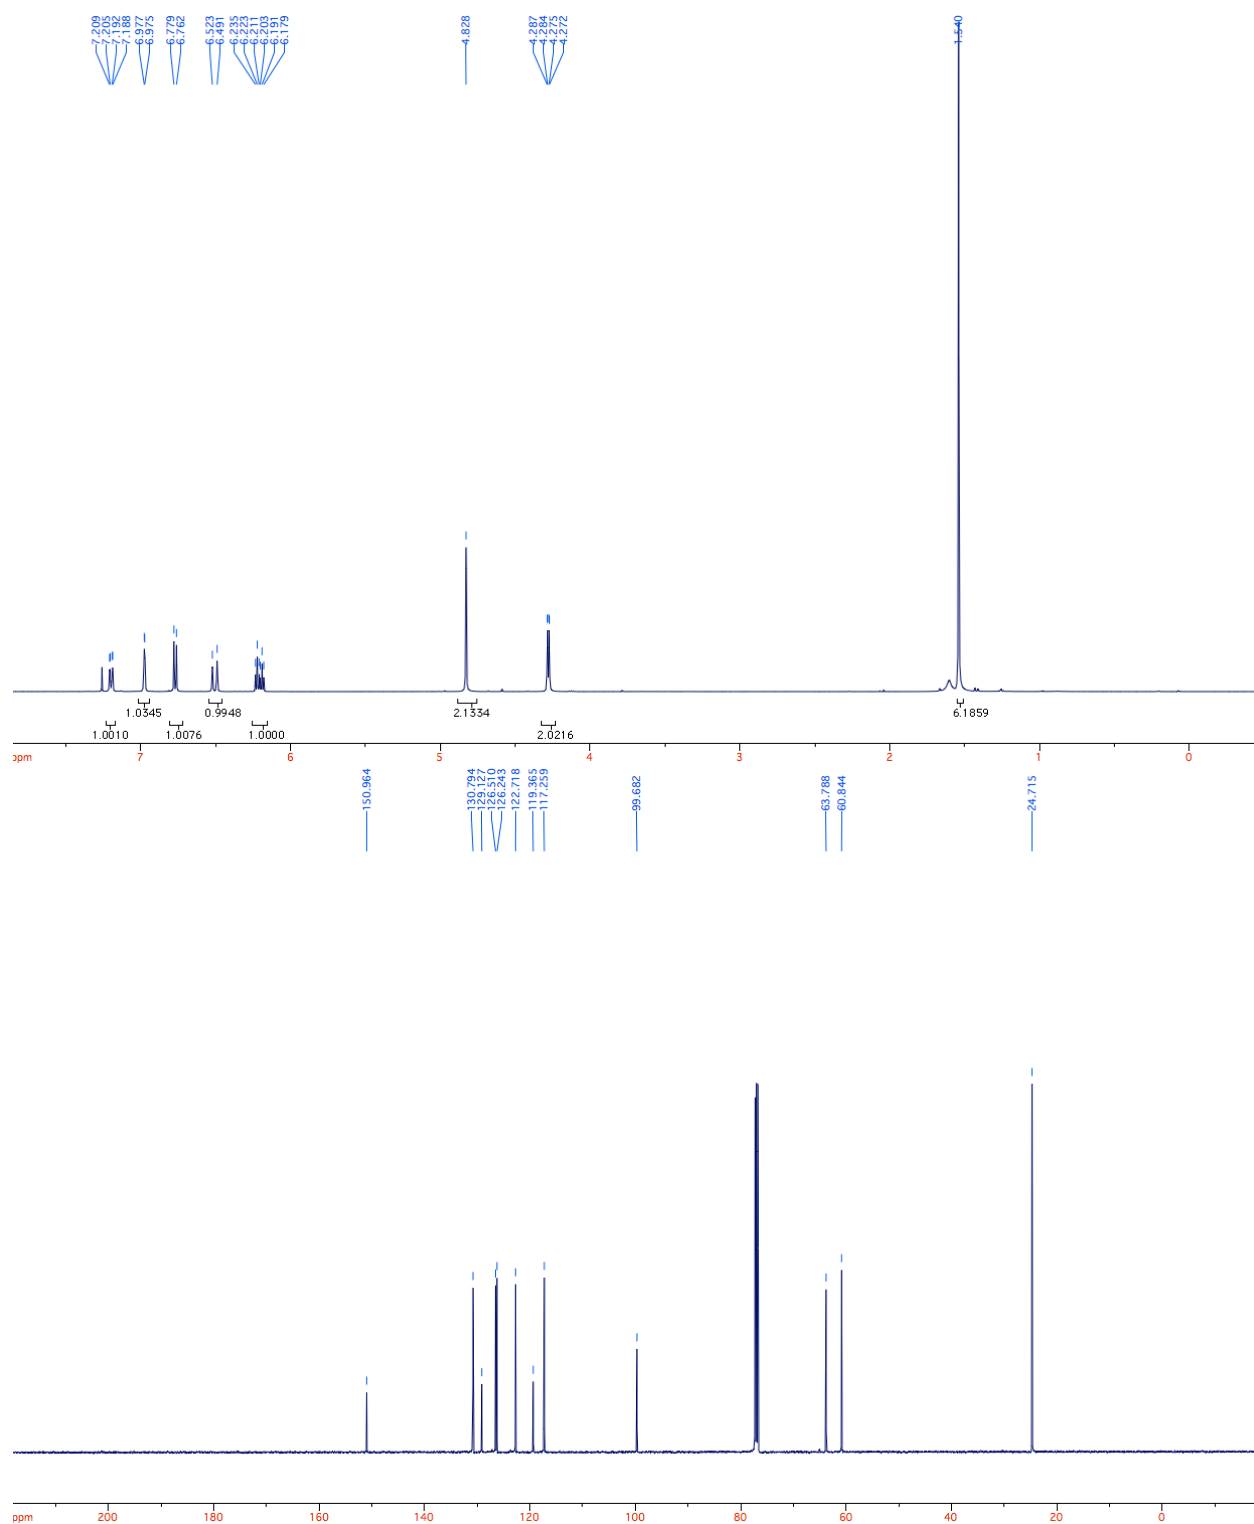

Background RT 1.04 - 1.25 (32 scans)  
SMK-4C3\_new\_inj5.datx 2021.11.11 14:05:46 ;  
APCI +

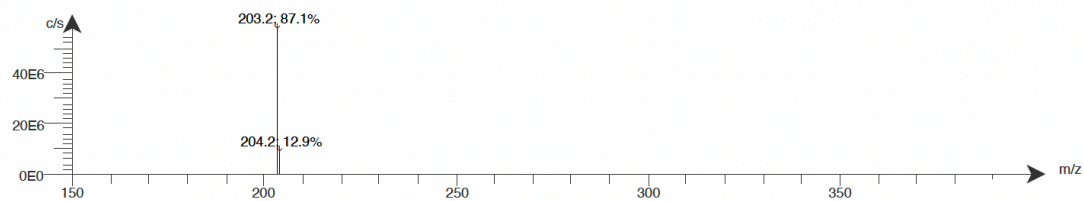

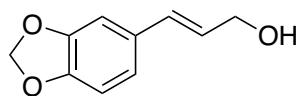

5E

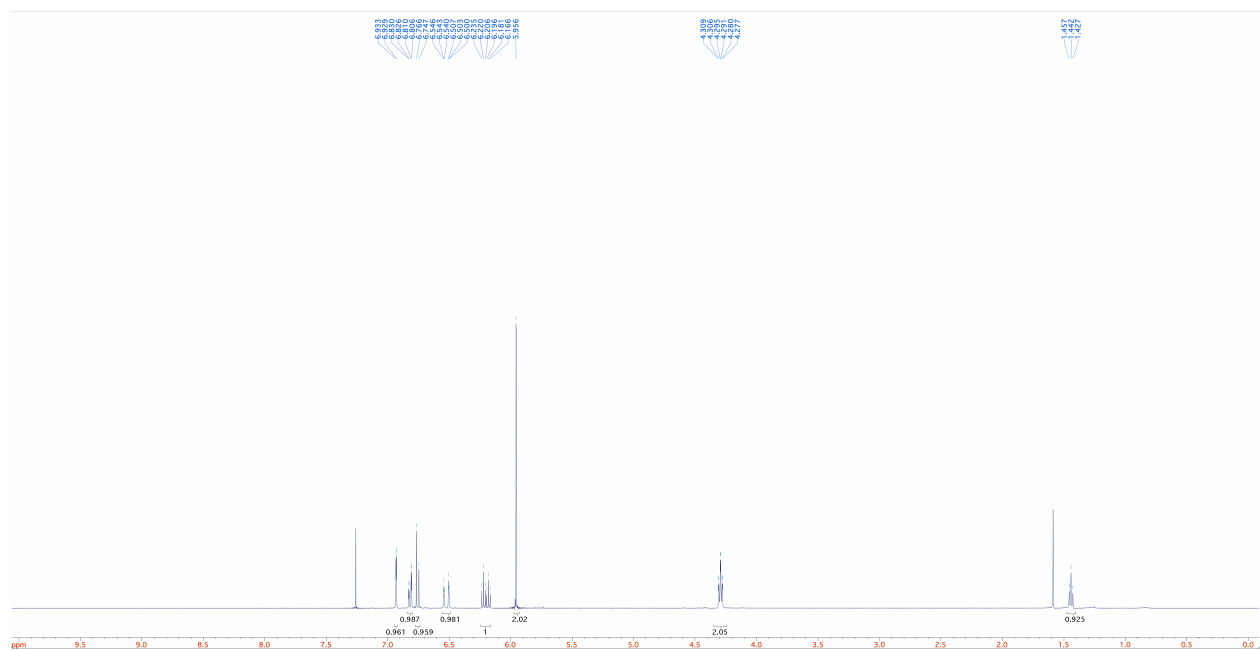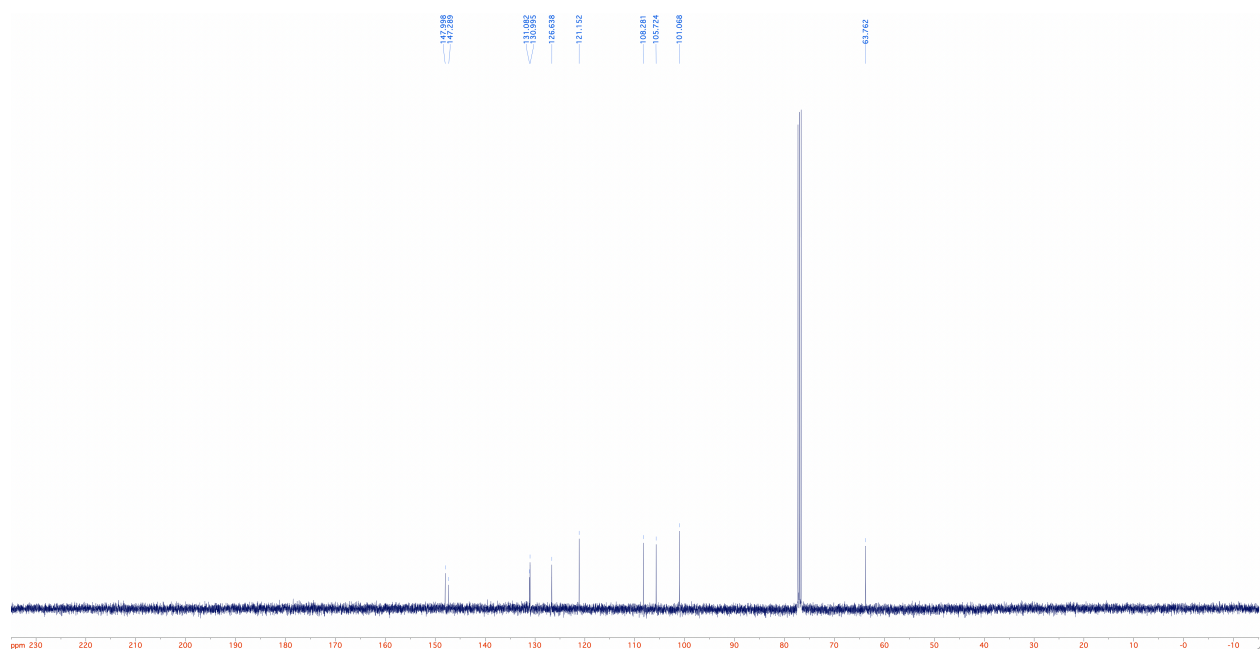

Background RT 1.14 - 1.29 (52 scans)  
SMK-4C5\_ESIpos\_inj1.datx 2021.12.07 17:00:54 ;  
ESI + Max: 5.8E7

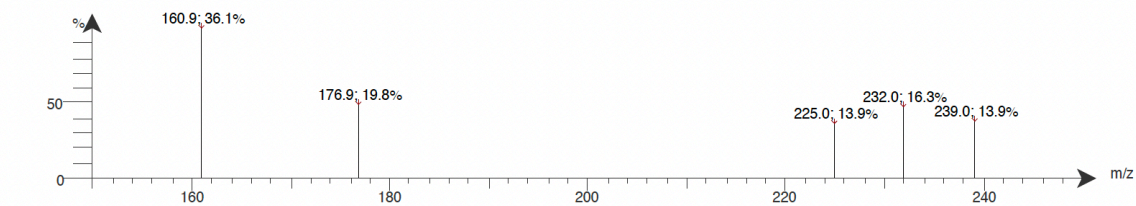

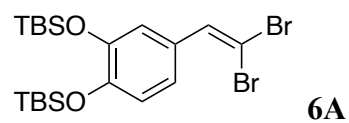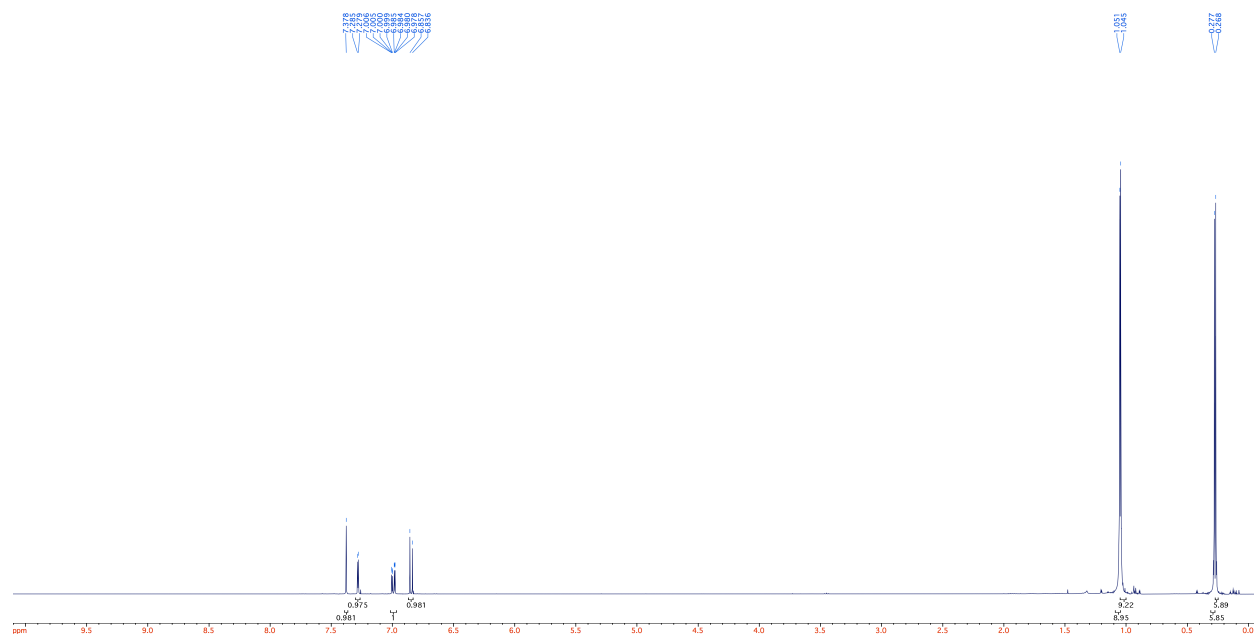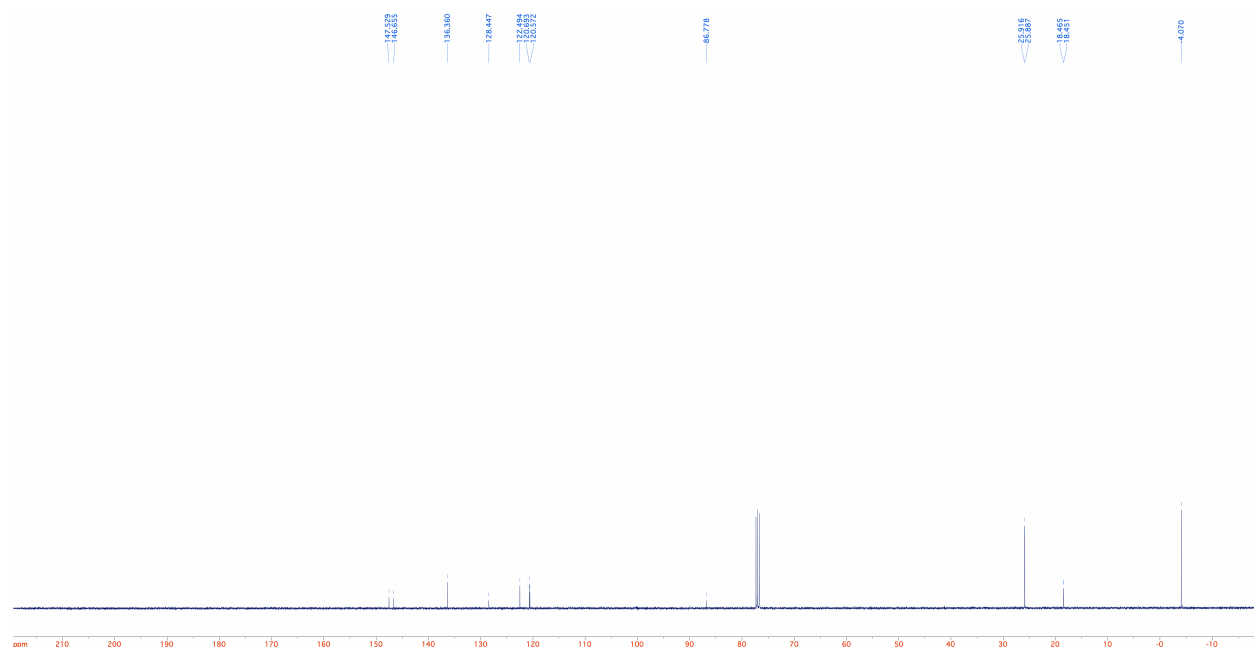

Background RT 1.05 - 1.32 (27 scans)  
 SMK-T-44c\_1\_A0\_inj4.datx 2021.11.11 12:54:41 ;  
 ESI - Max: 2.4E5

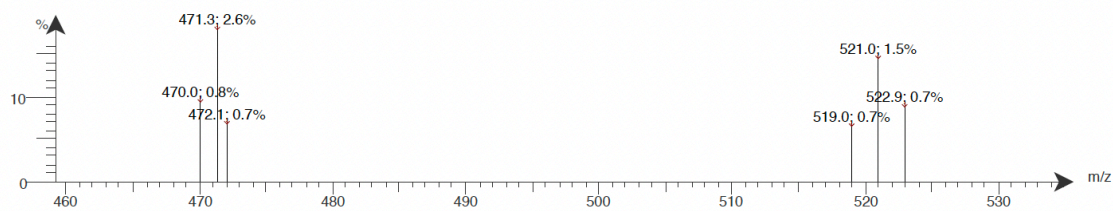

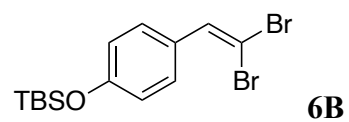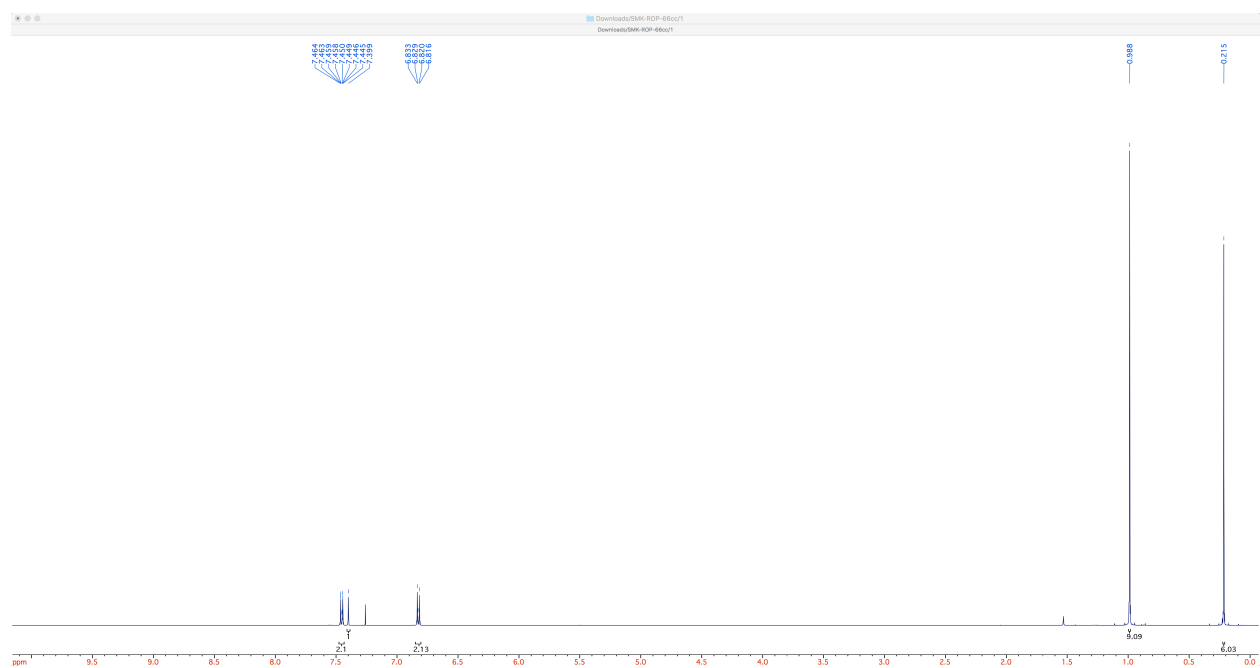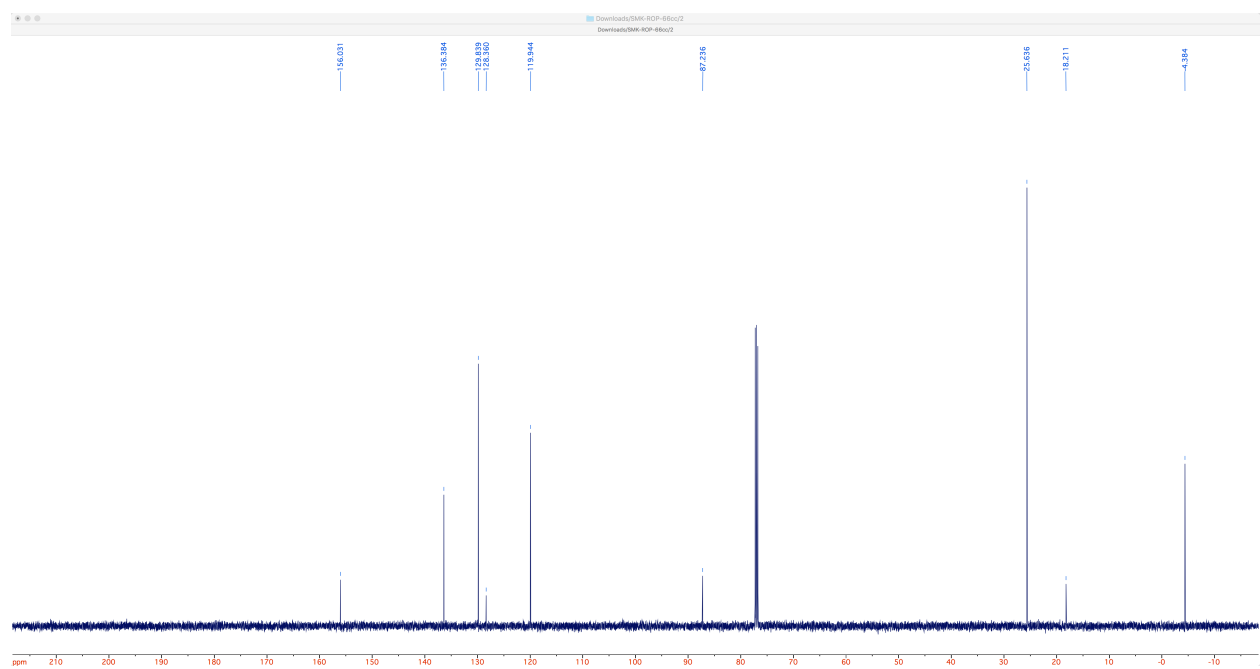

Background RT 1.02 - 1.14 (13 scans)  
KeMIS-194A\_1\_A1\_inj3.datx 2021.10.28 17:27:24 ;  
ESI - Max: 2.3E6

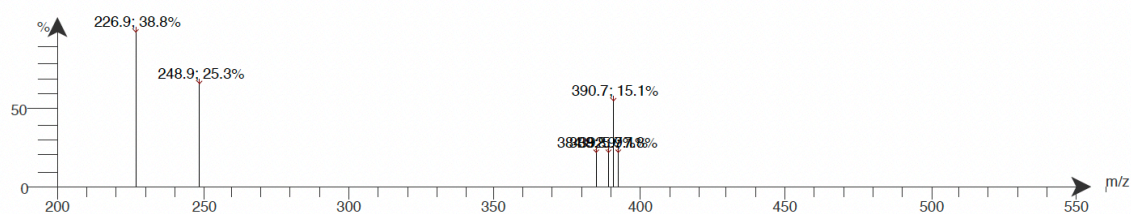

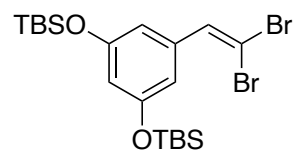

6C

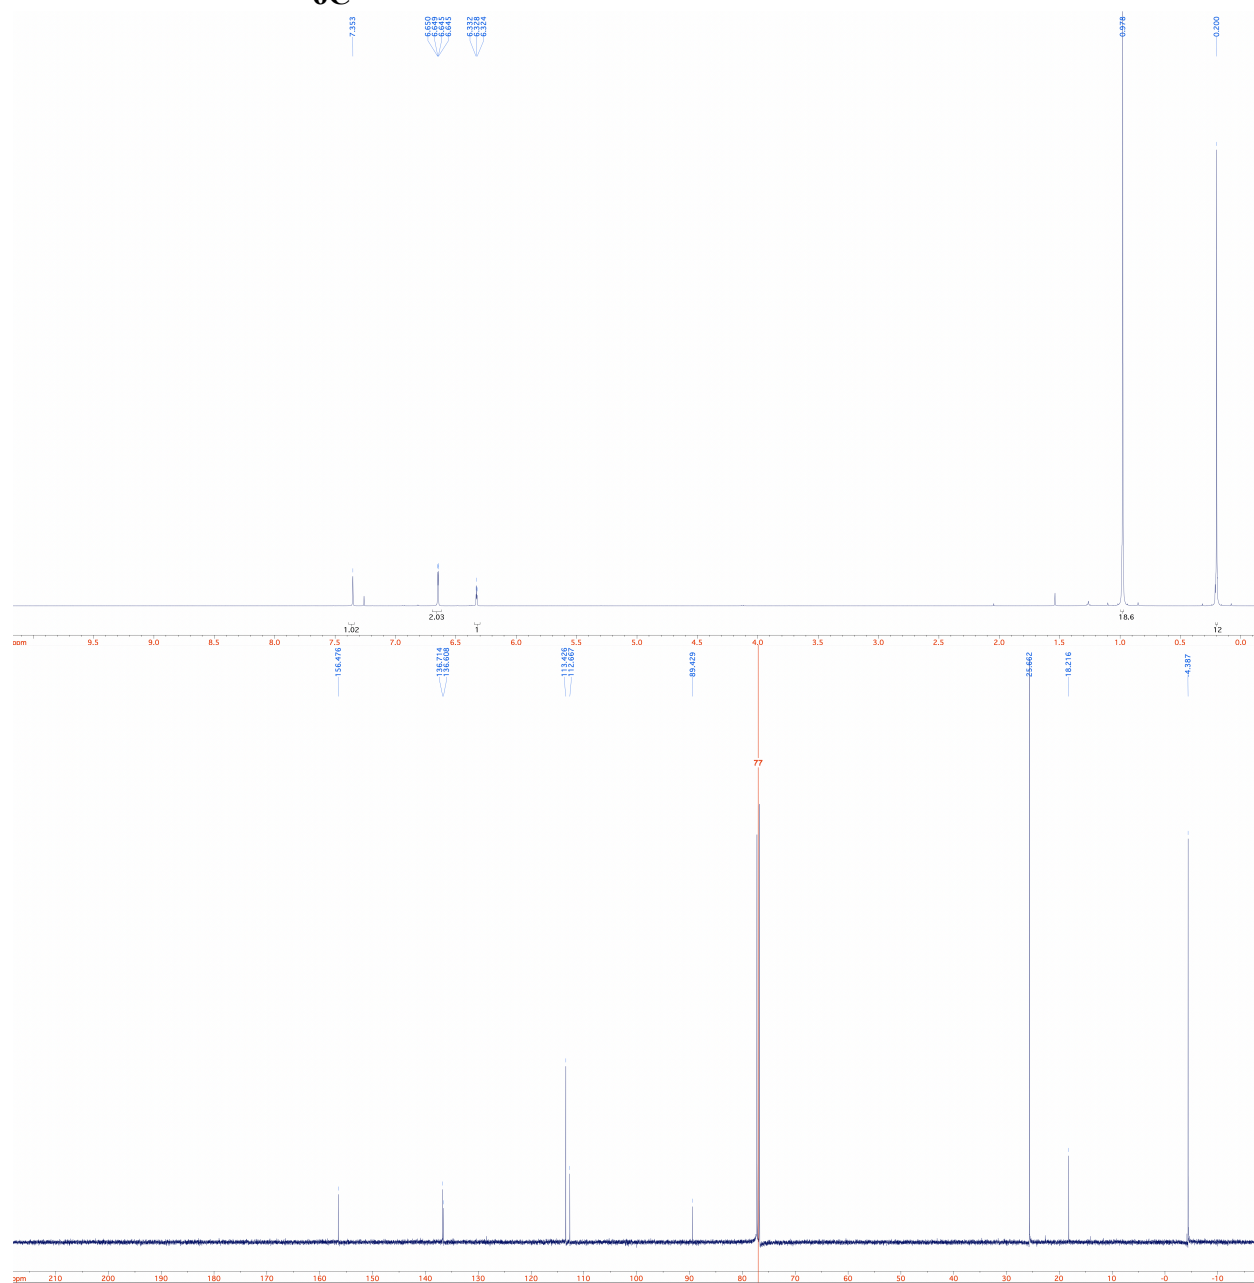

Background RT 1.14 - 1.34 {18 scans}  
RC-ROP-6\_1\_A4\_inj1.datx 2021.10.29 09:56:30 ;  
ESI - Max: 1.4E6

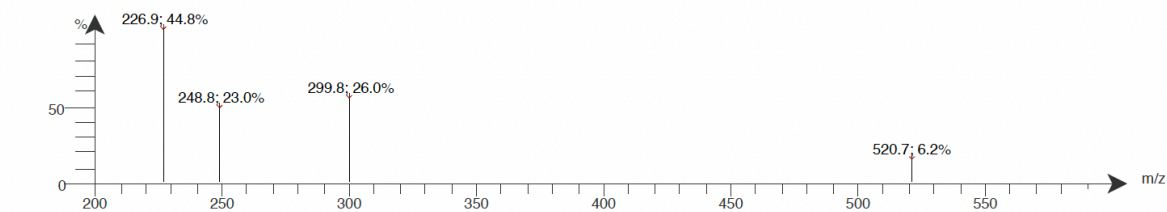

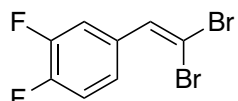

6D

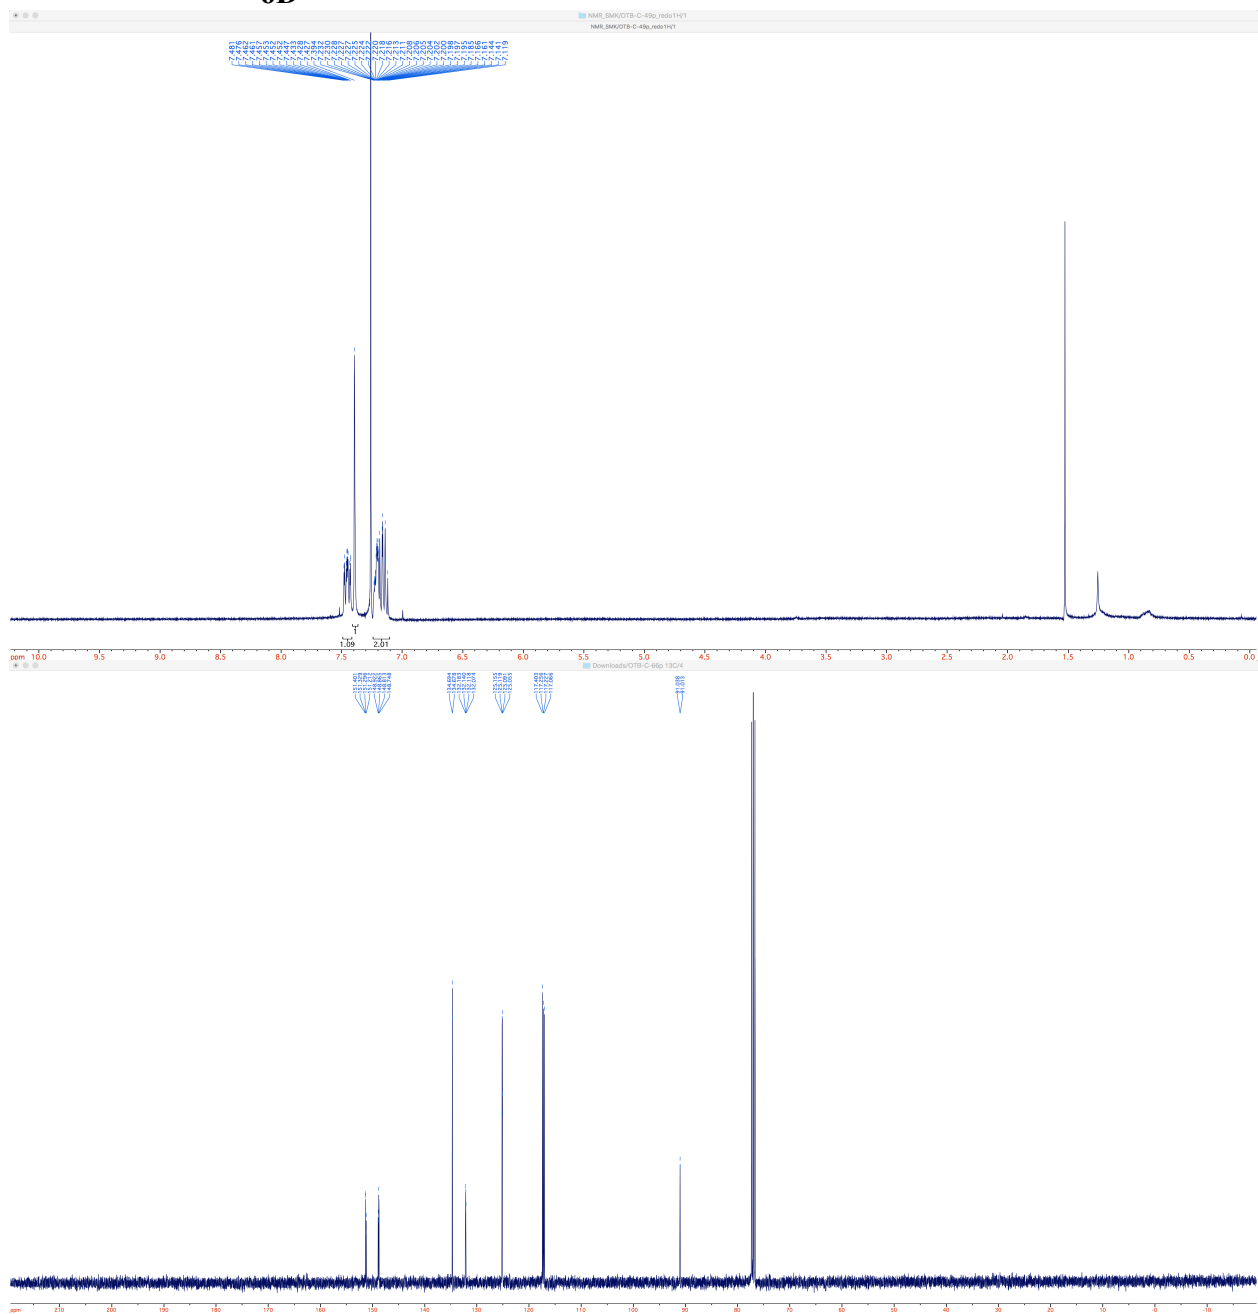

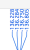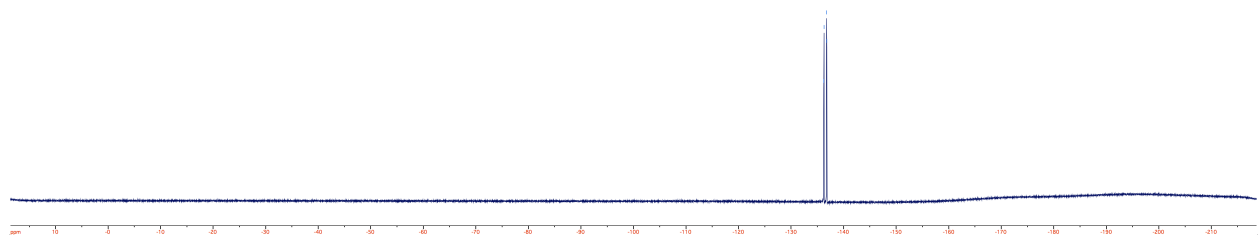

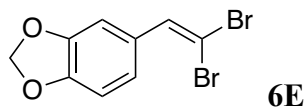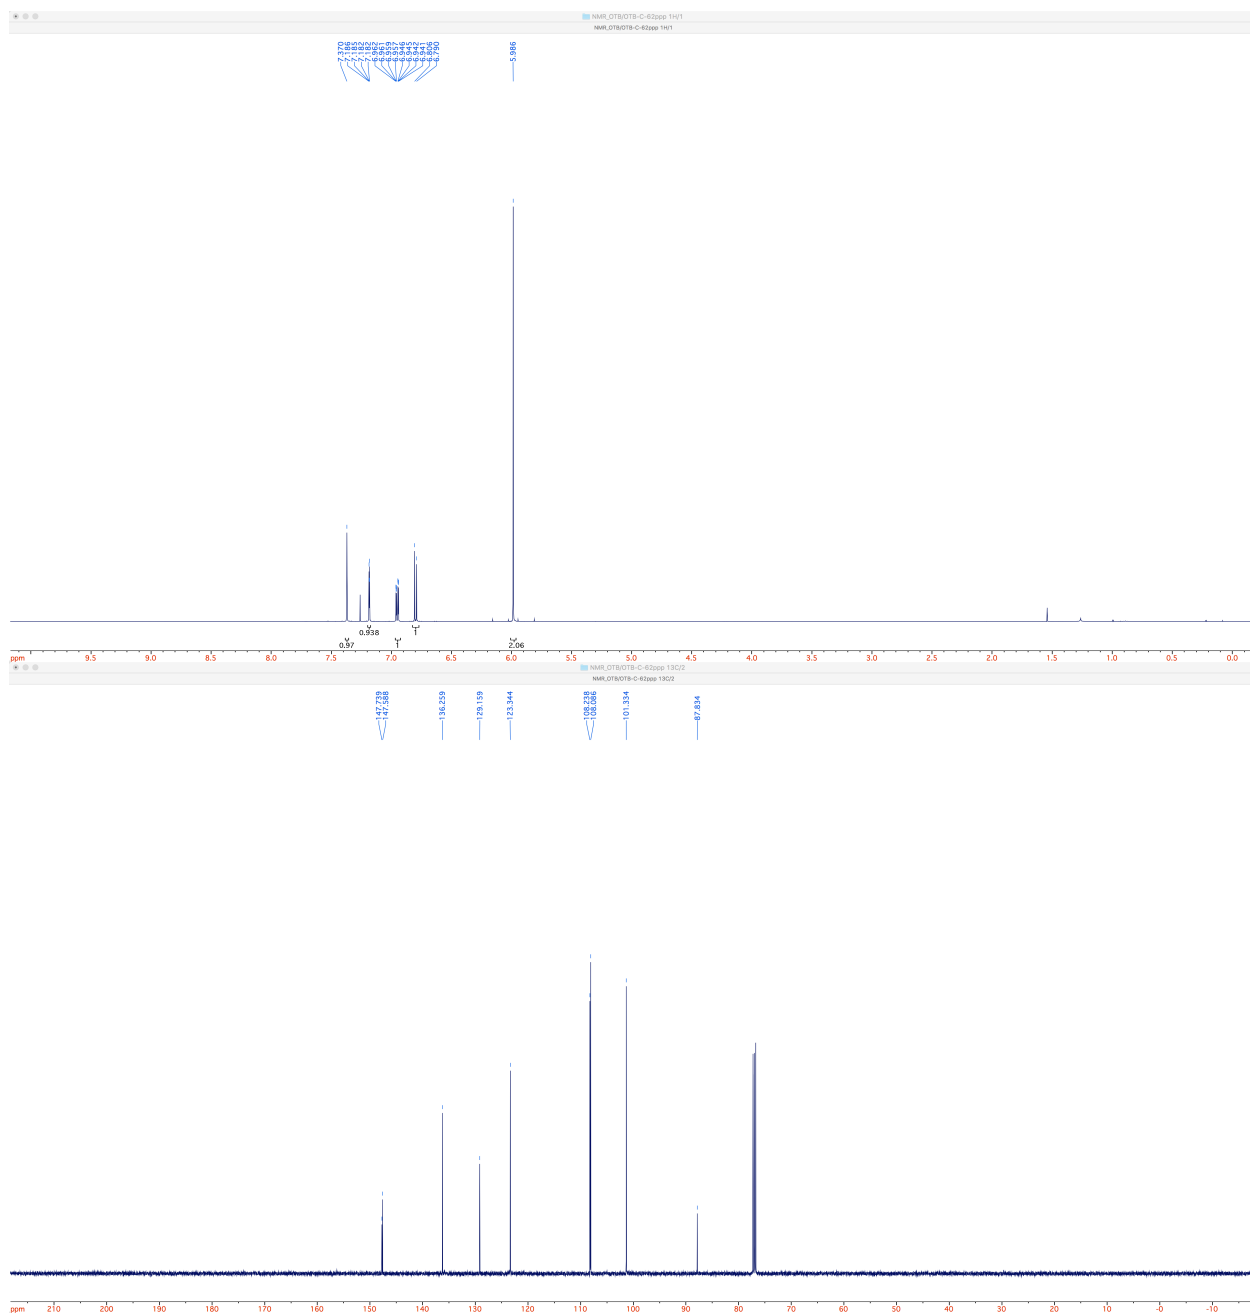

Spectrum RT 1.05 - 1.15 (8 scans)  
PC-ROP-5\_1\_C5\_APCI\_inj1.datx 2021.11.12 14:37:08 ;  
Intensity APCI + Max: 1E7

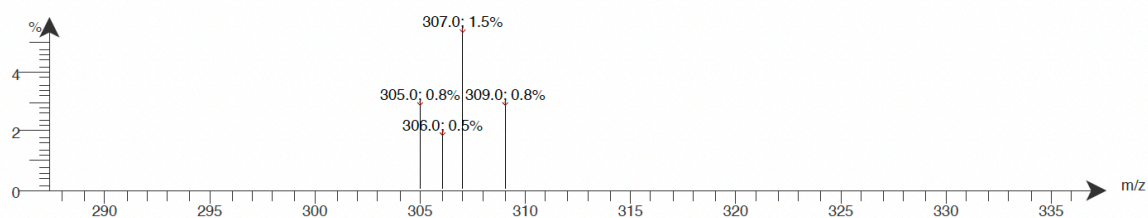

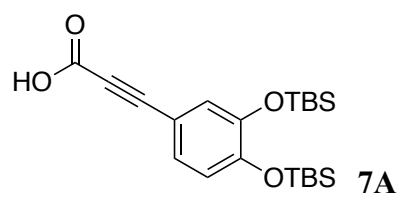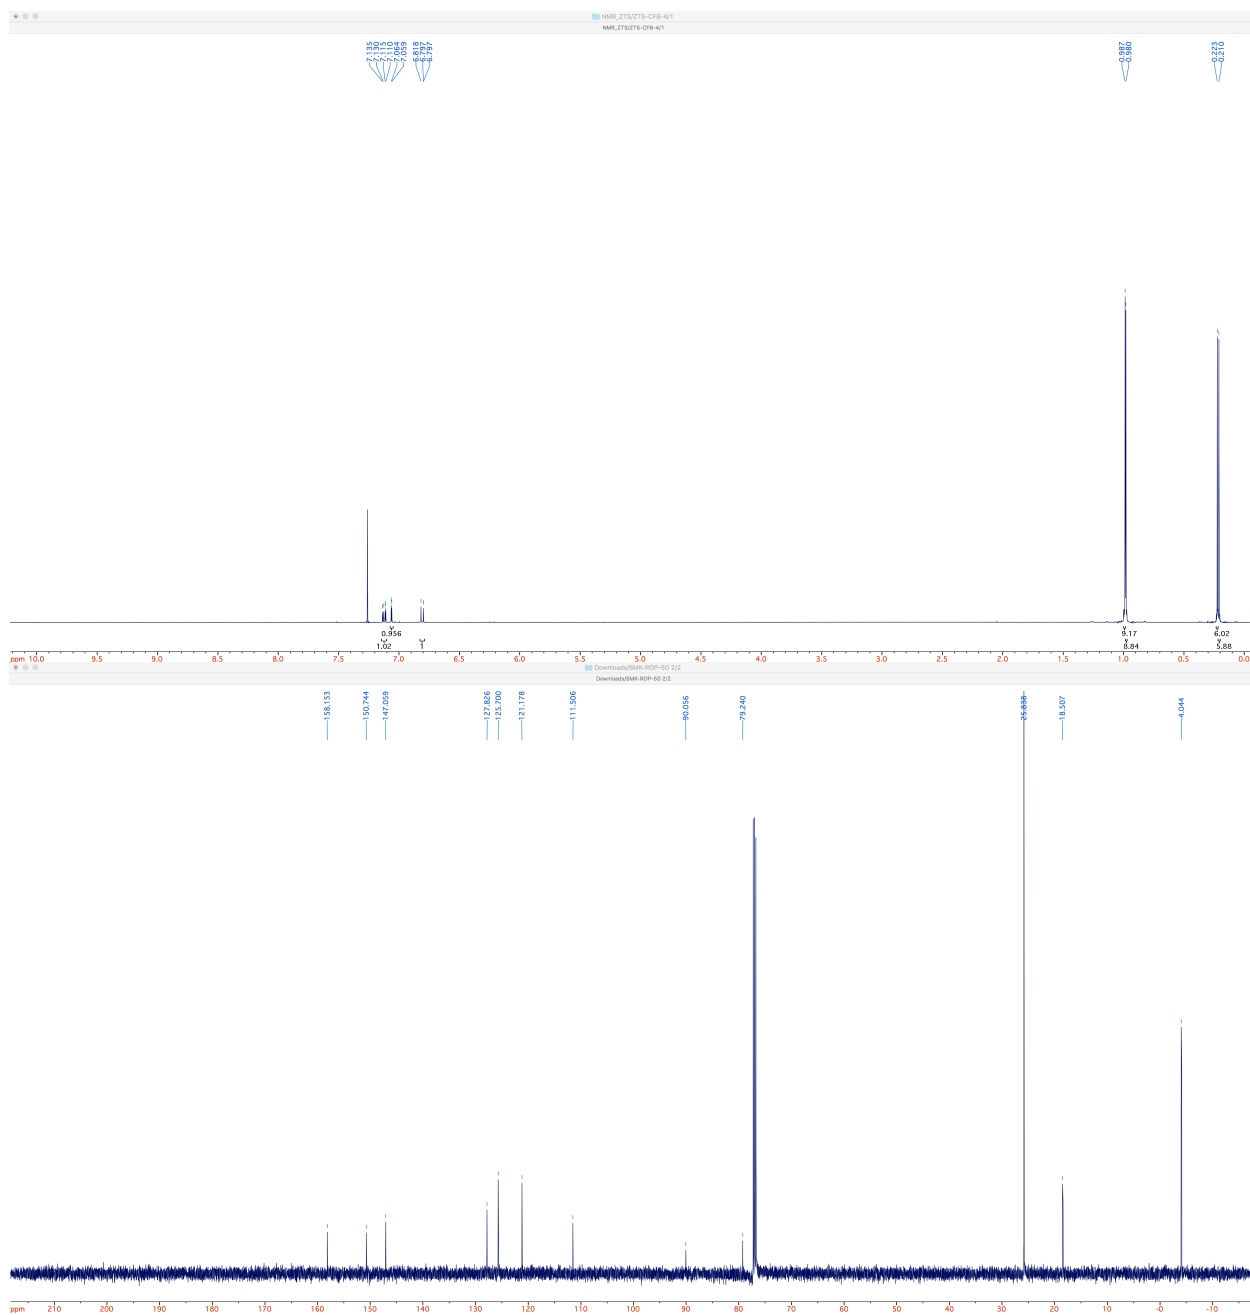

# User Spectra

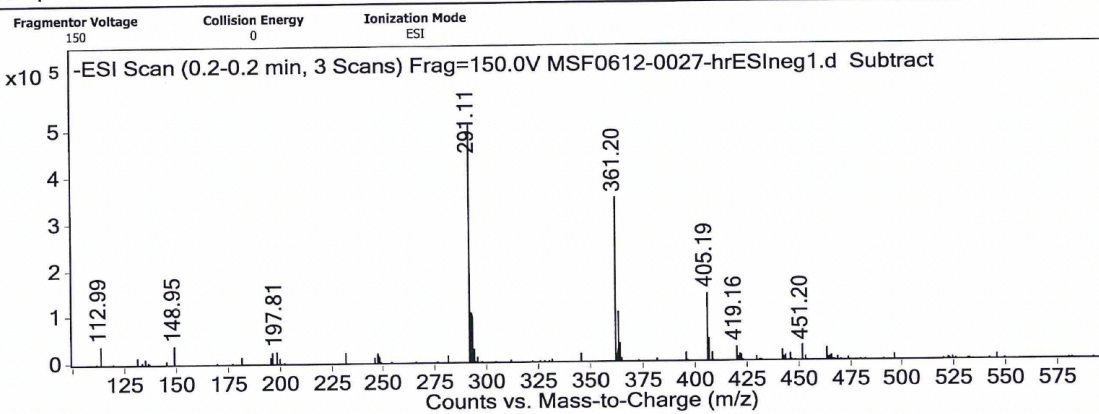

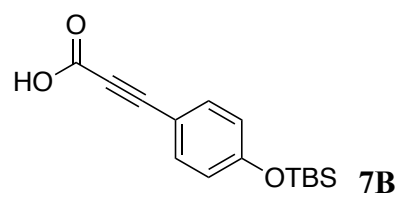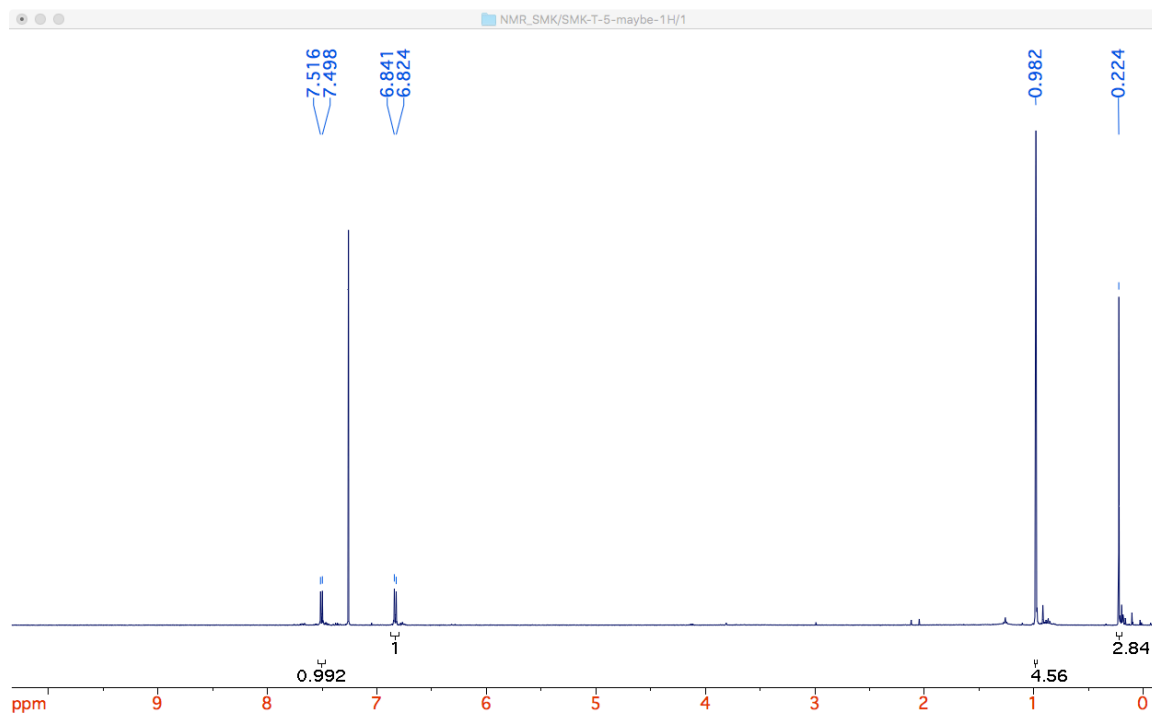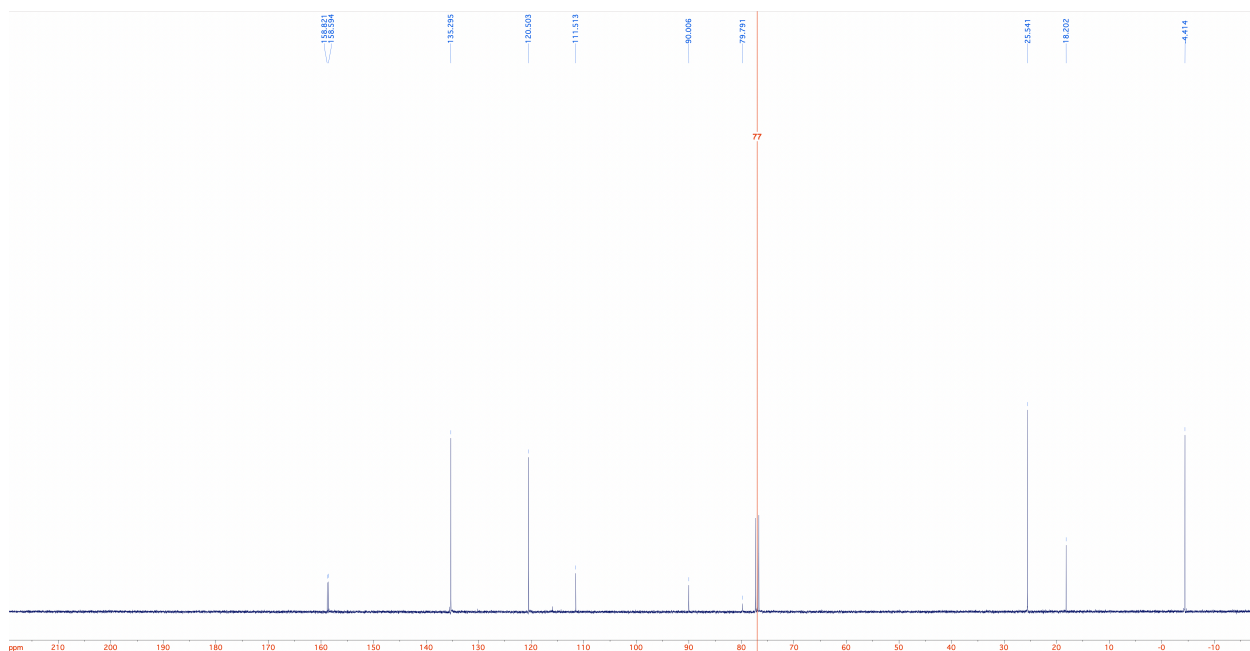

Background RT 0.97 - 1.13 {13 scans}  
SMK-T-5\_inj1.datx 2021.07.27 15:27:19 ;  
ESI - Max: 3E8

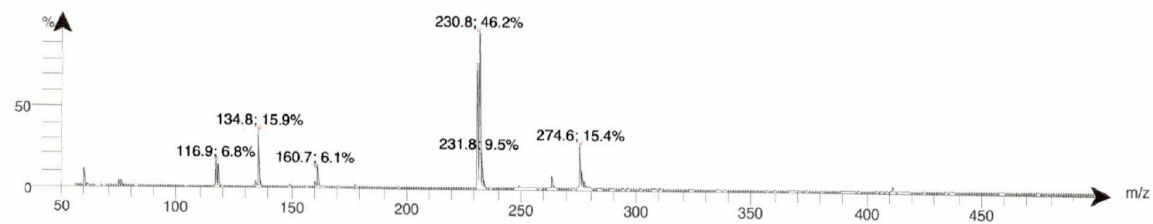

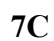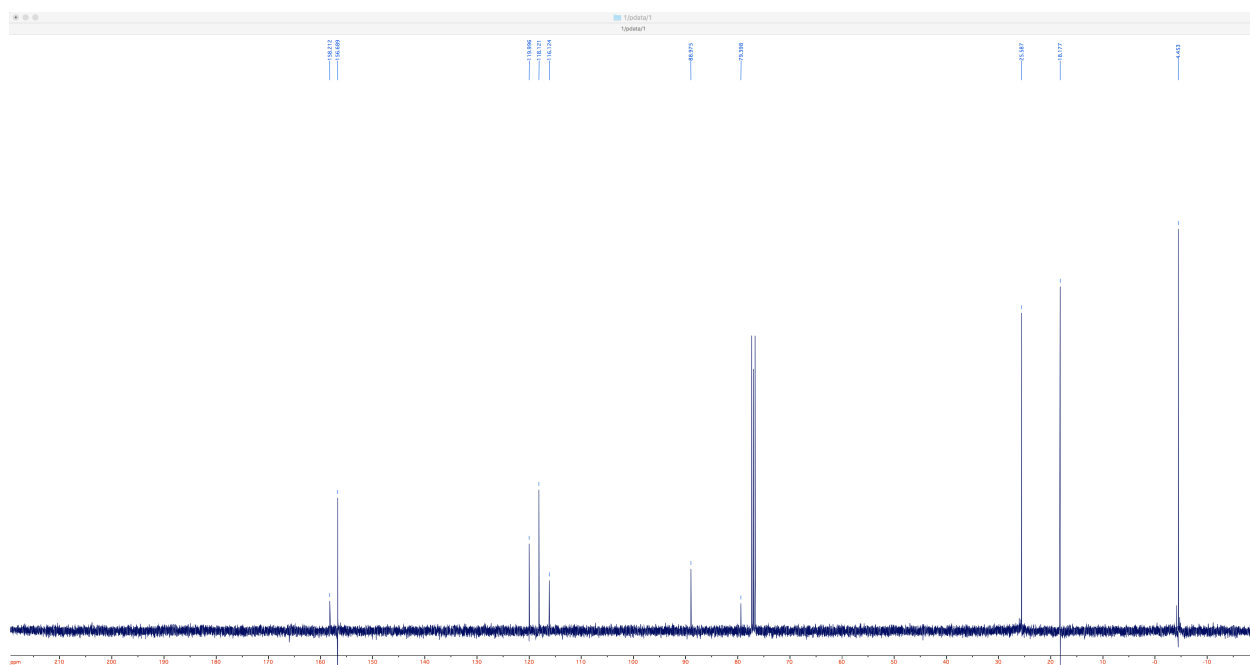

Background RT 1.63 - 1.91 (22 scans)  
KeMIS-180A\_inj1.datx 2021.07.26 15:46:12 ;  
ESI - Max: 2.7E8

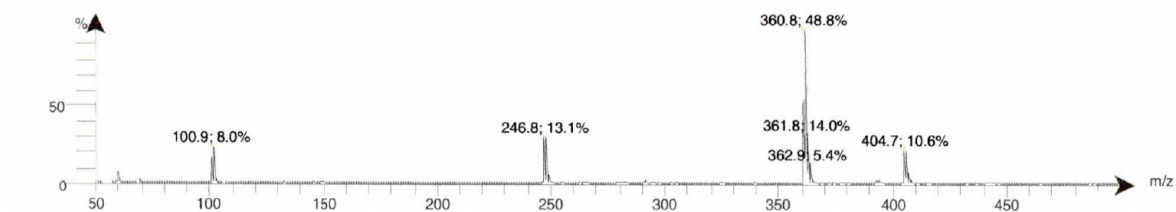

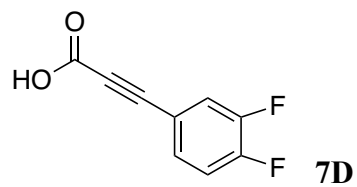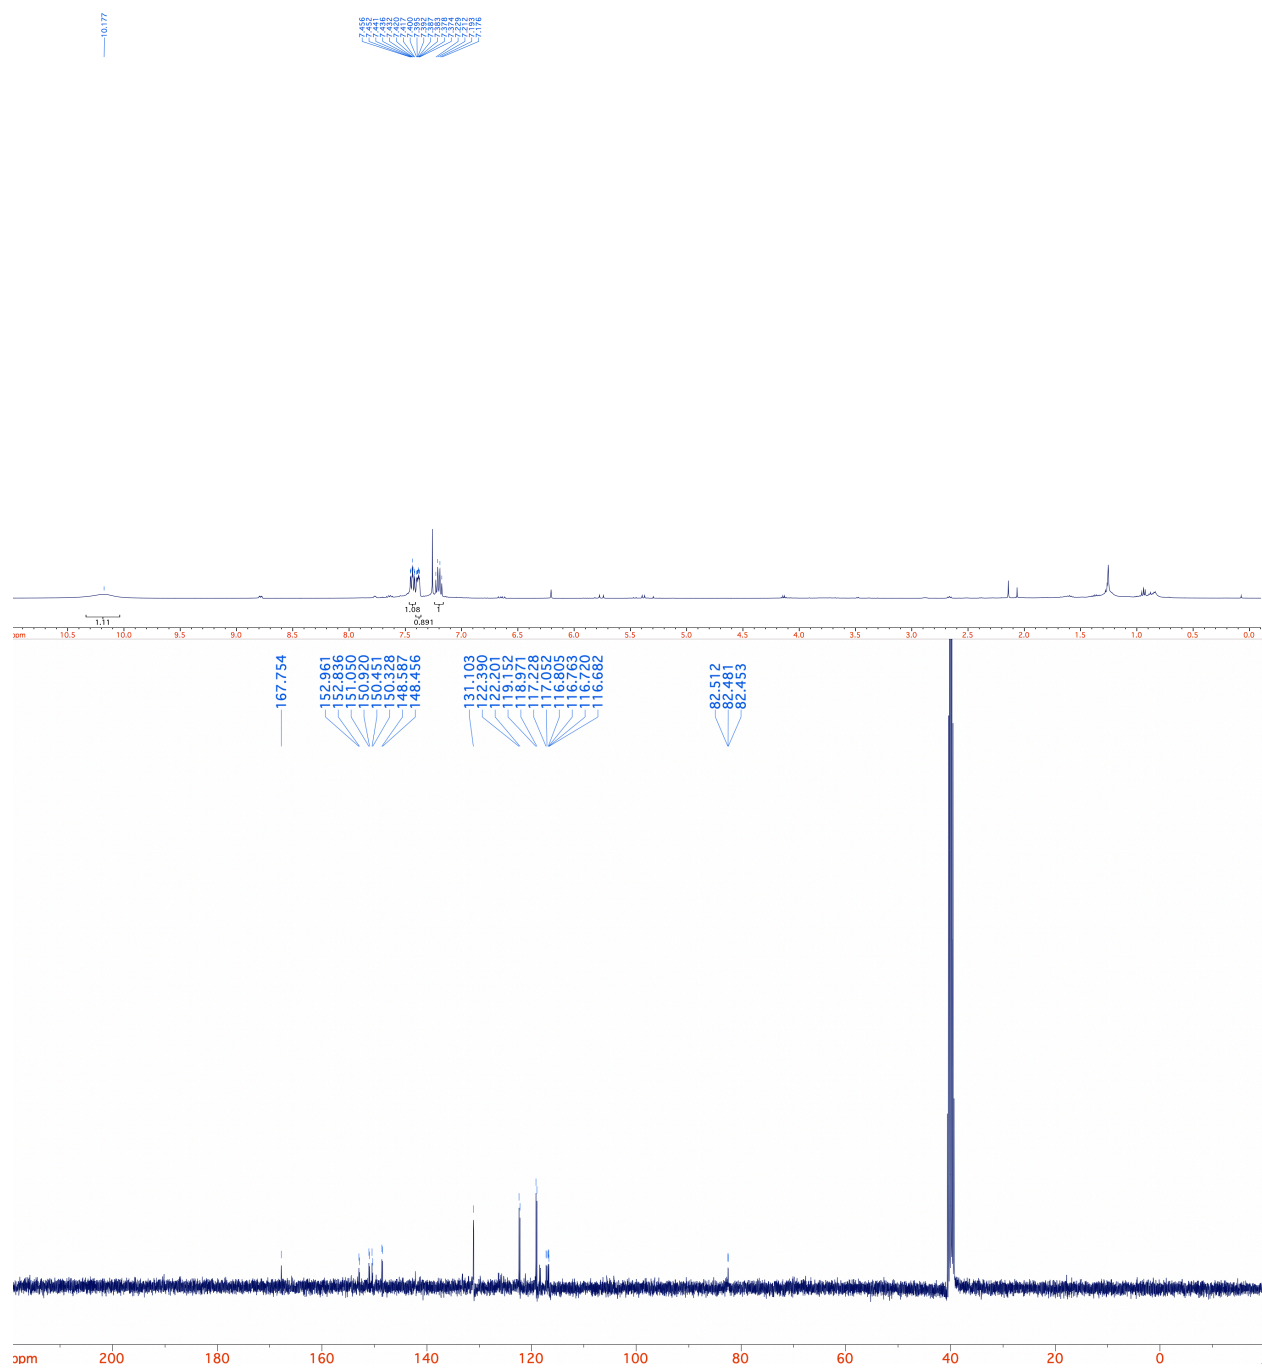

Background RT 1.09 - 1.25 (13 scans)  
OTB-C-71\_inj1.datx 2021.08.03 16:04:08 ;  
ESI - Max: 1.9E8

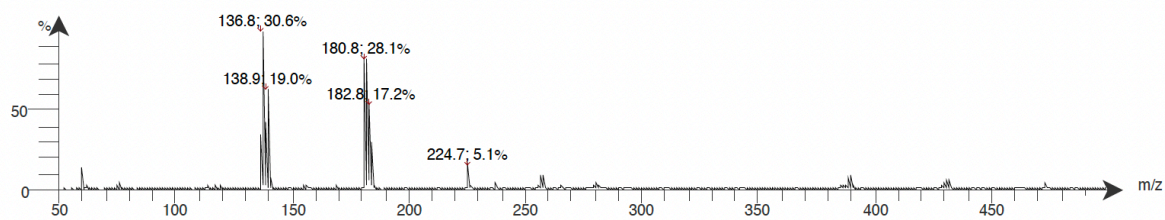

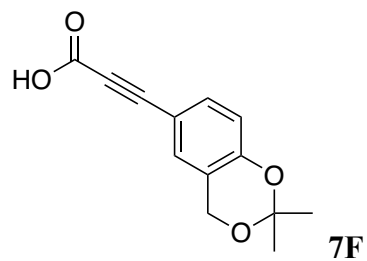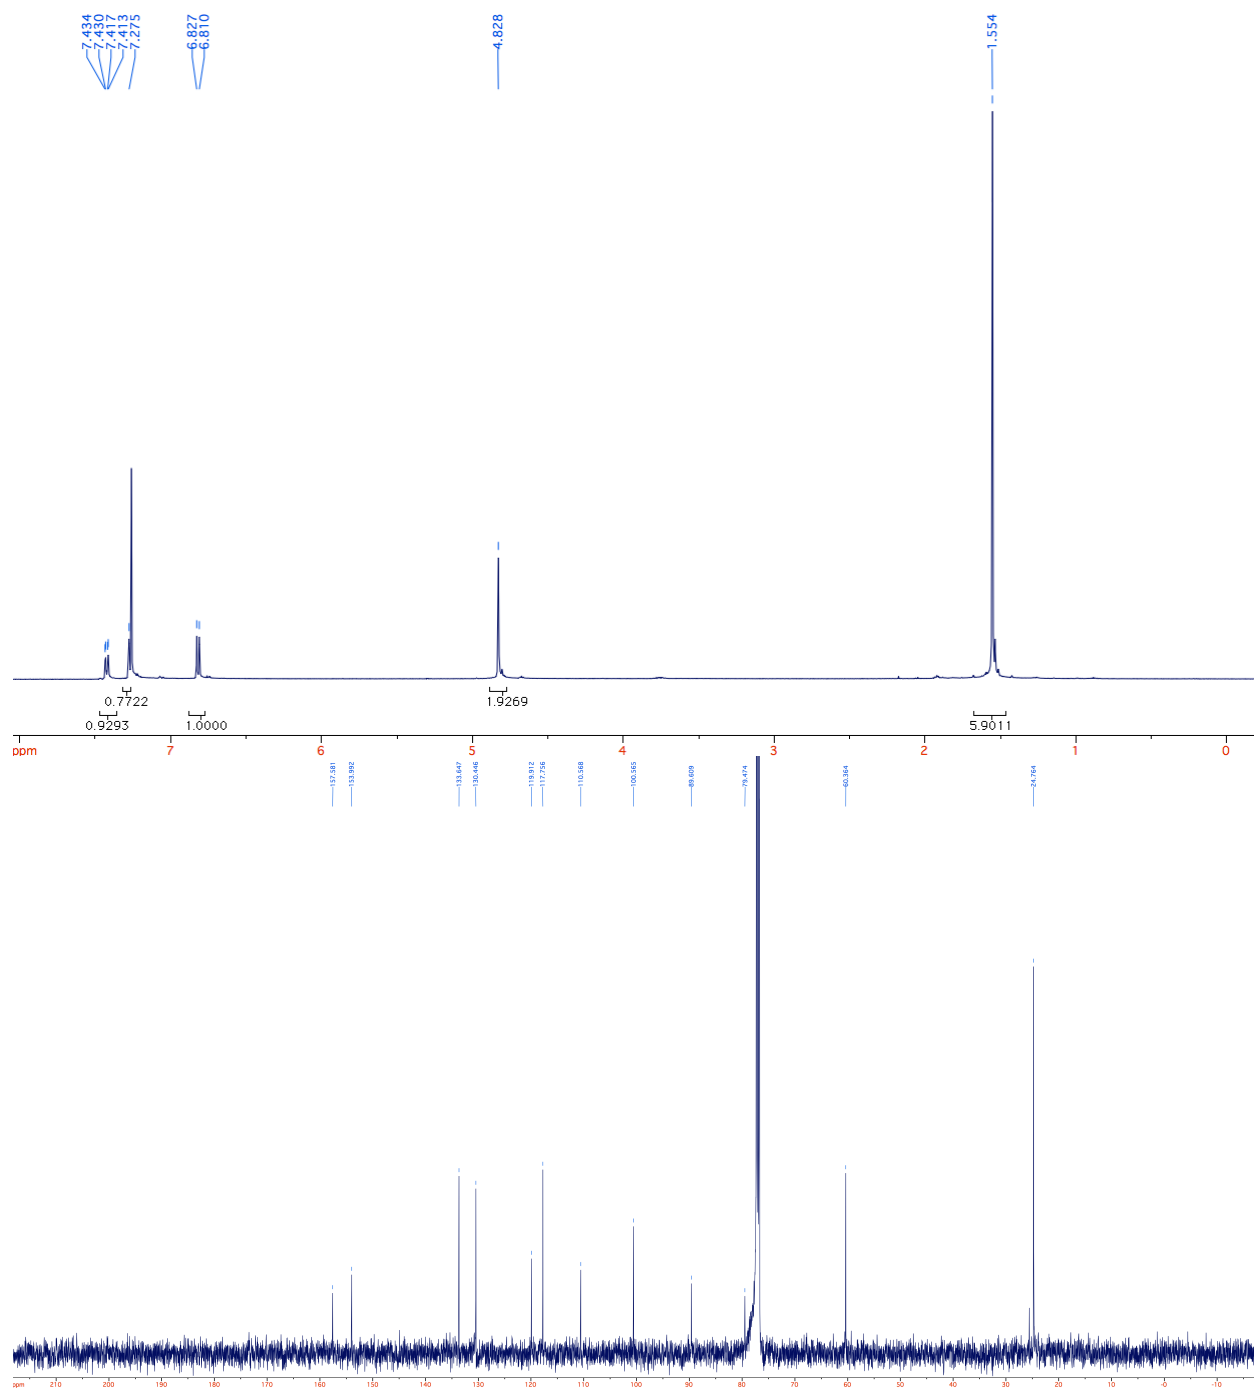

Background RT 0.97 - 1.14 (14 scans)  
SMK-PT-94X1\_inj1.datx 2021.07.26 17:33:03 ;  
ESI - Max: 3.6E7

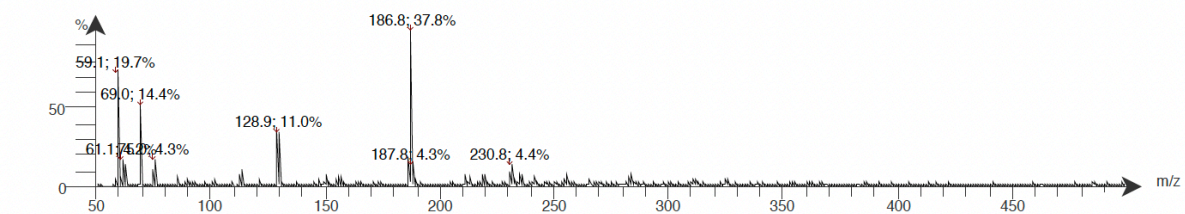

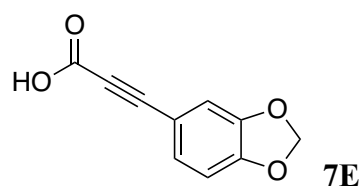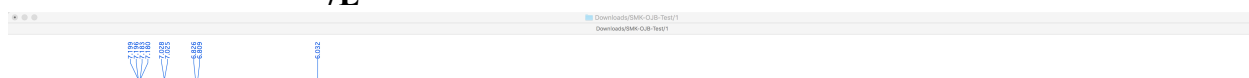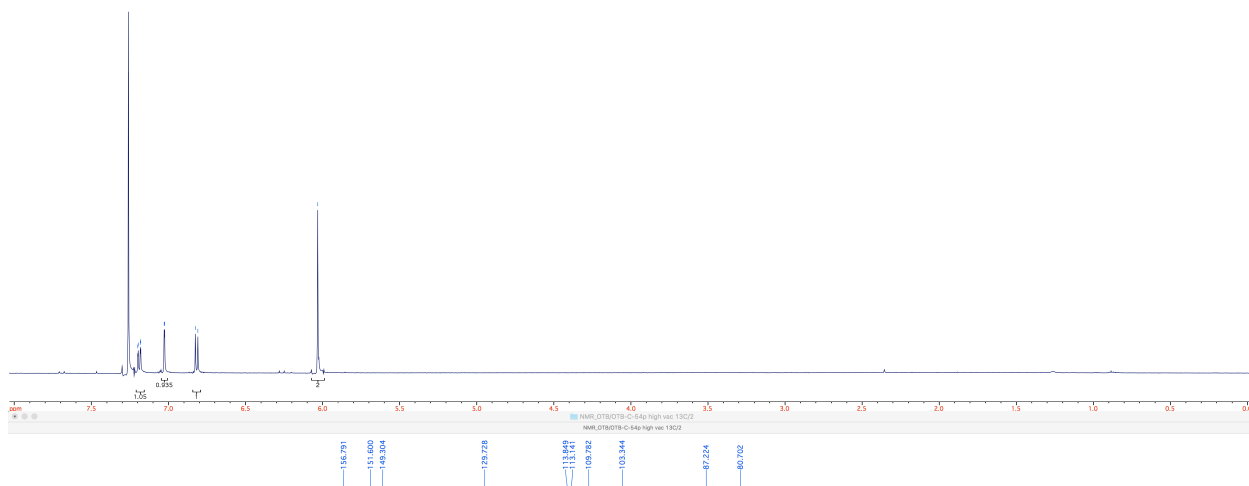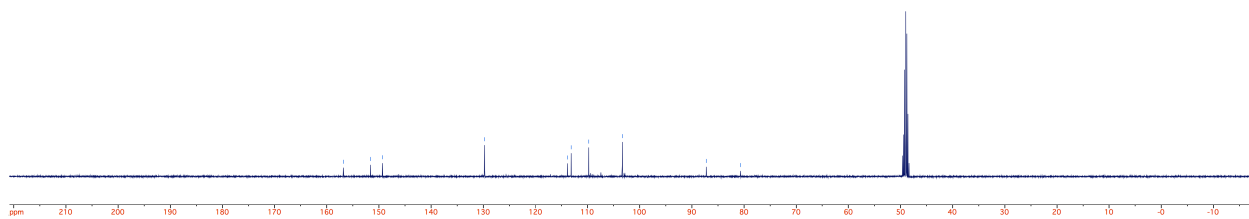

Background RT 0.80 - 0.94 (12 scans)  
OTB-C-54\_inj4.datx 2021.08.05 12:47:15 ;  
ESI - Max: 7.7E7

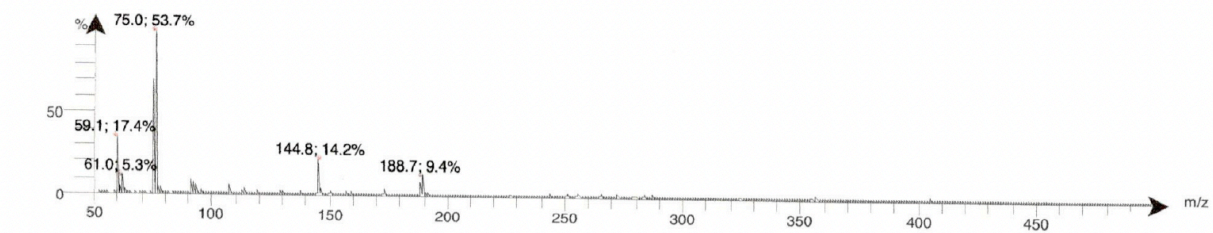

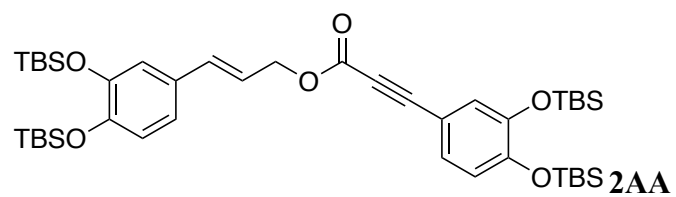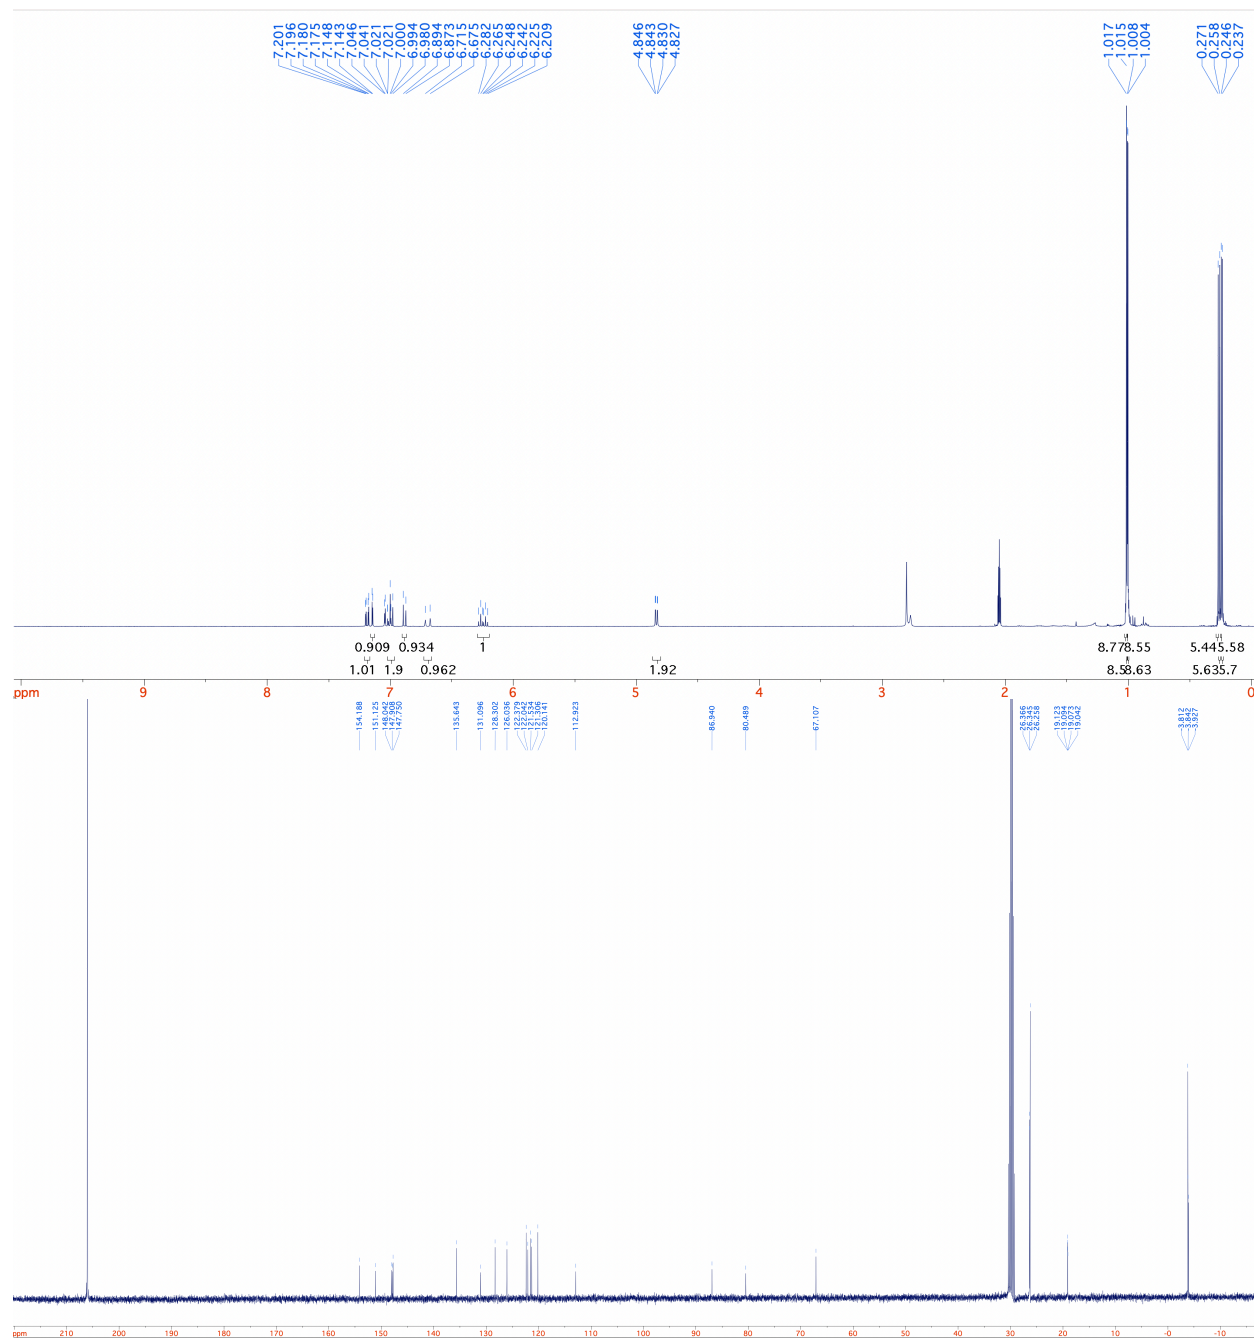

# User Spectra

Fragmentor Voltage 220 Collision Energy 0 Ionization Mode ESI

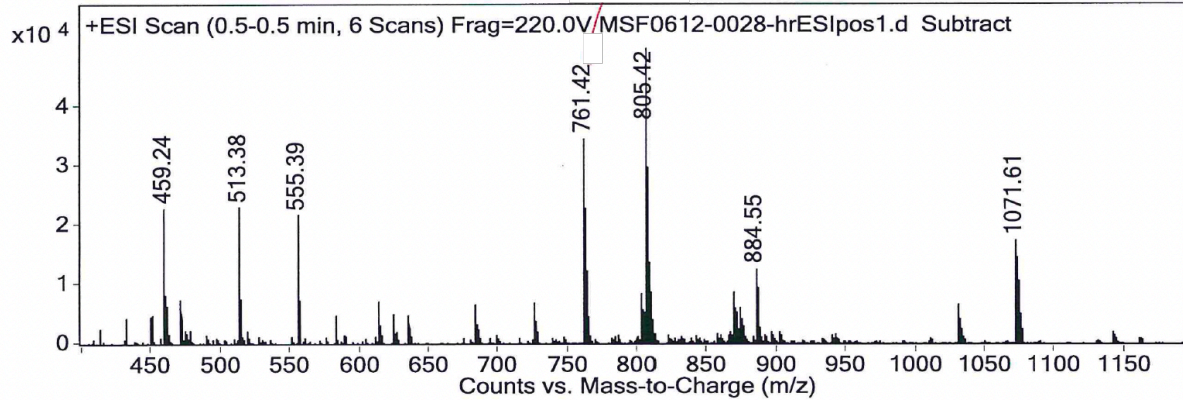

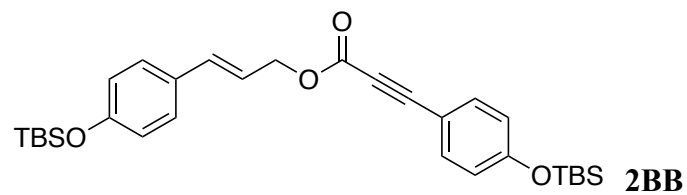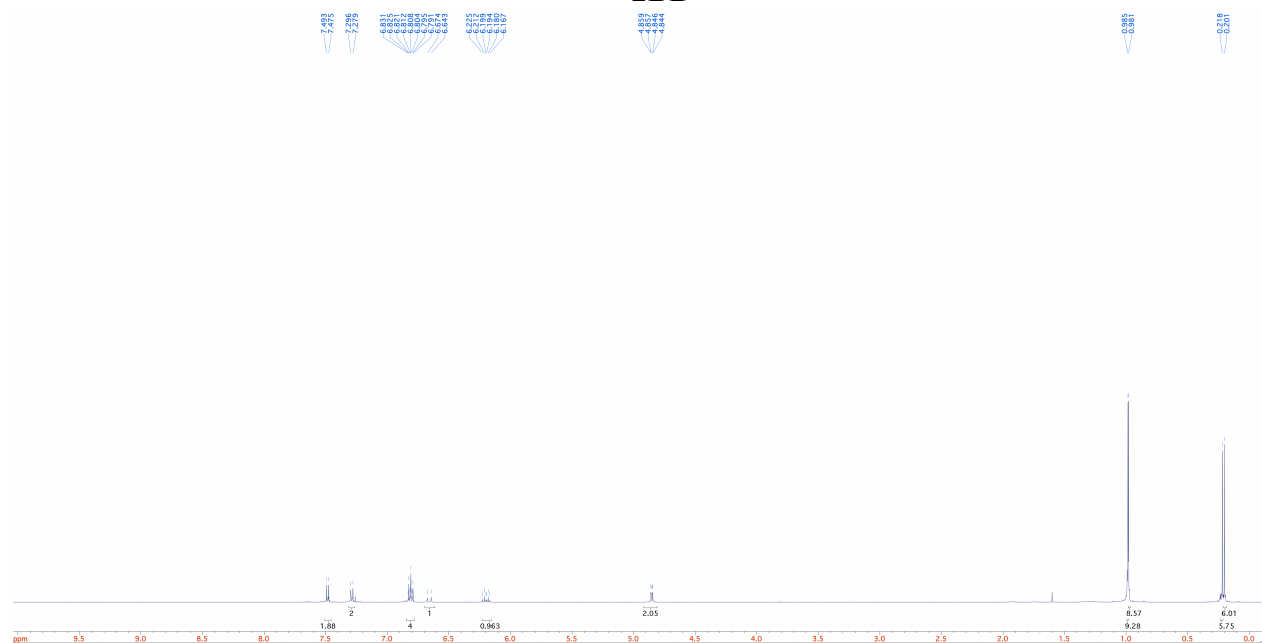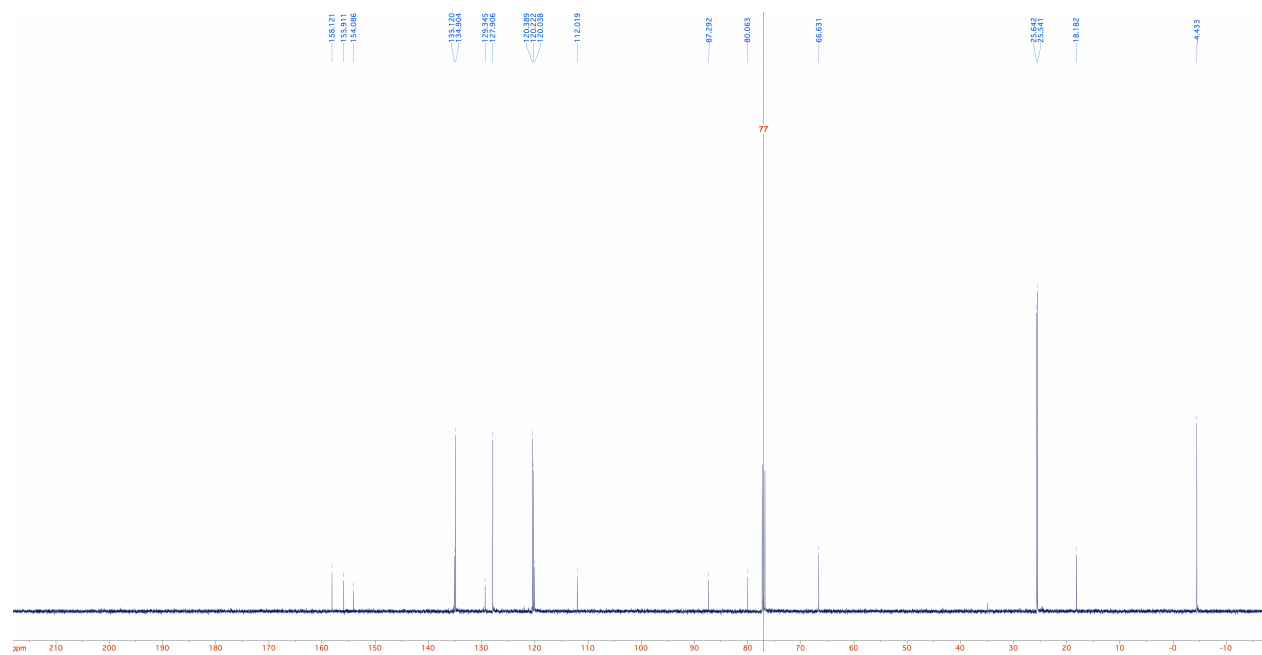

Background RT 0.88 - 0.99 (14 scans)  
SMK-T60\_ESIpos\_inj2.datx 2021.12.08 12:13:24 ;  
ESI + Max: 3E6

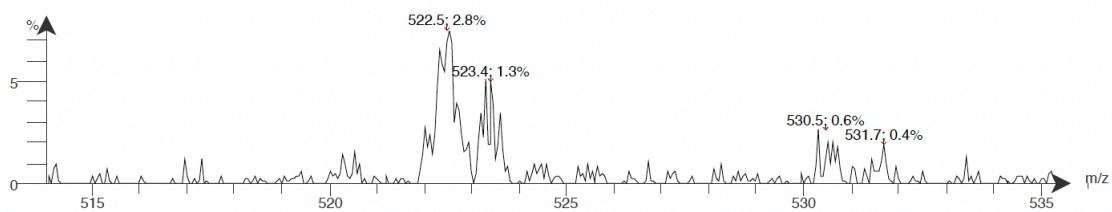

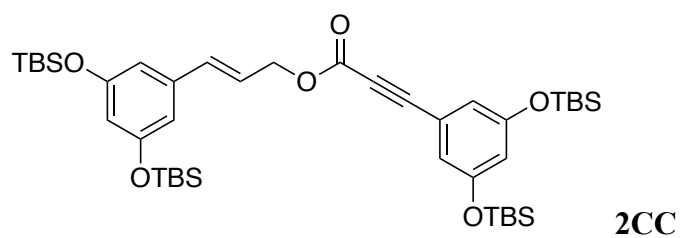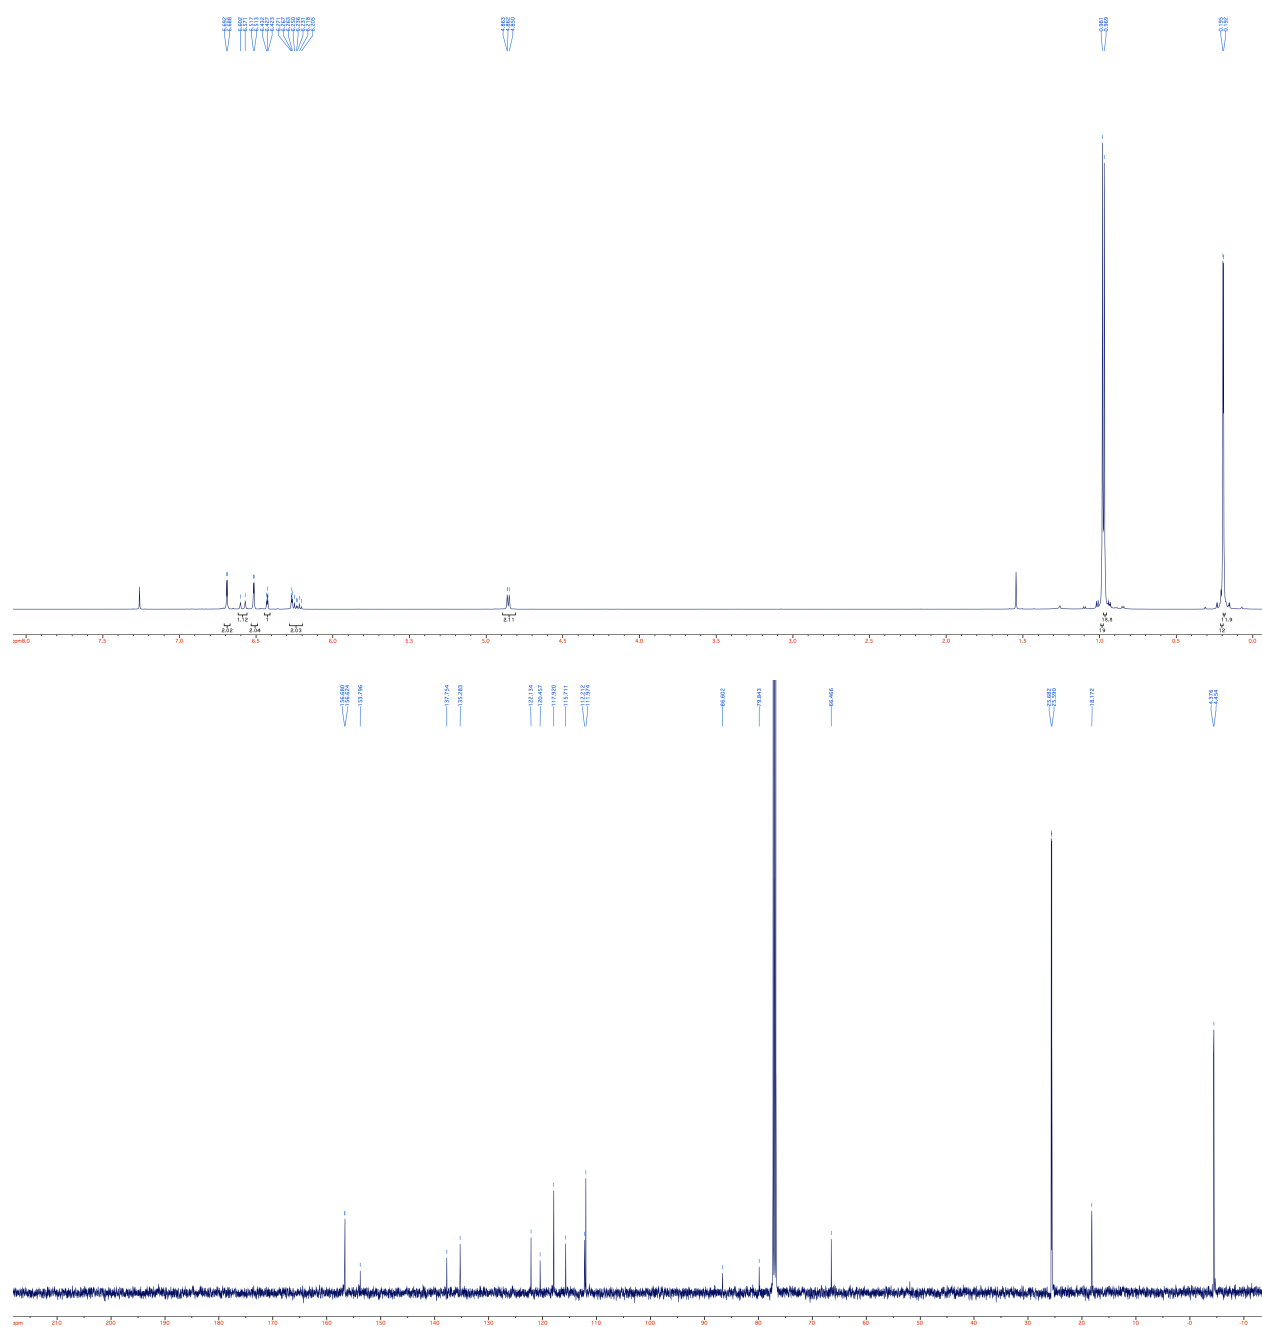

Intensity

Background RT 0.87 - 1.12 {31 scans}  
SMK-T-82cc2\_ESIpos\_inj1.datx 2021.12.09 10:38:29 ;  
ESI + Max: 4.2E6

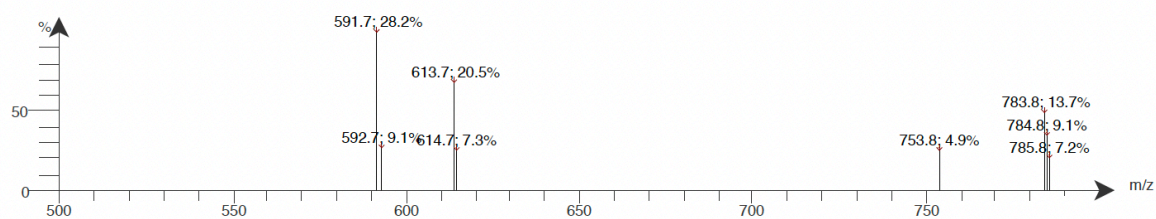

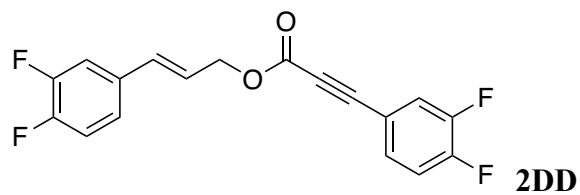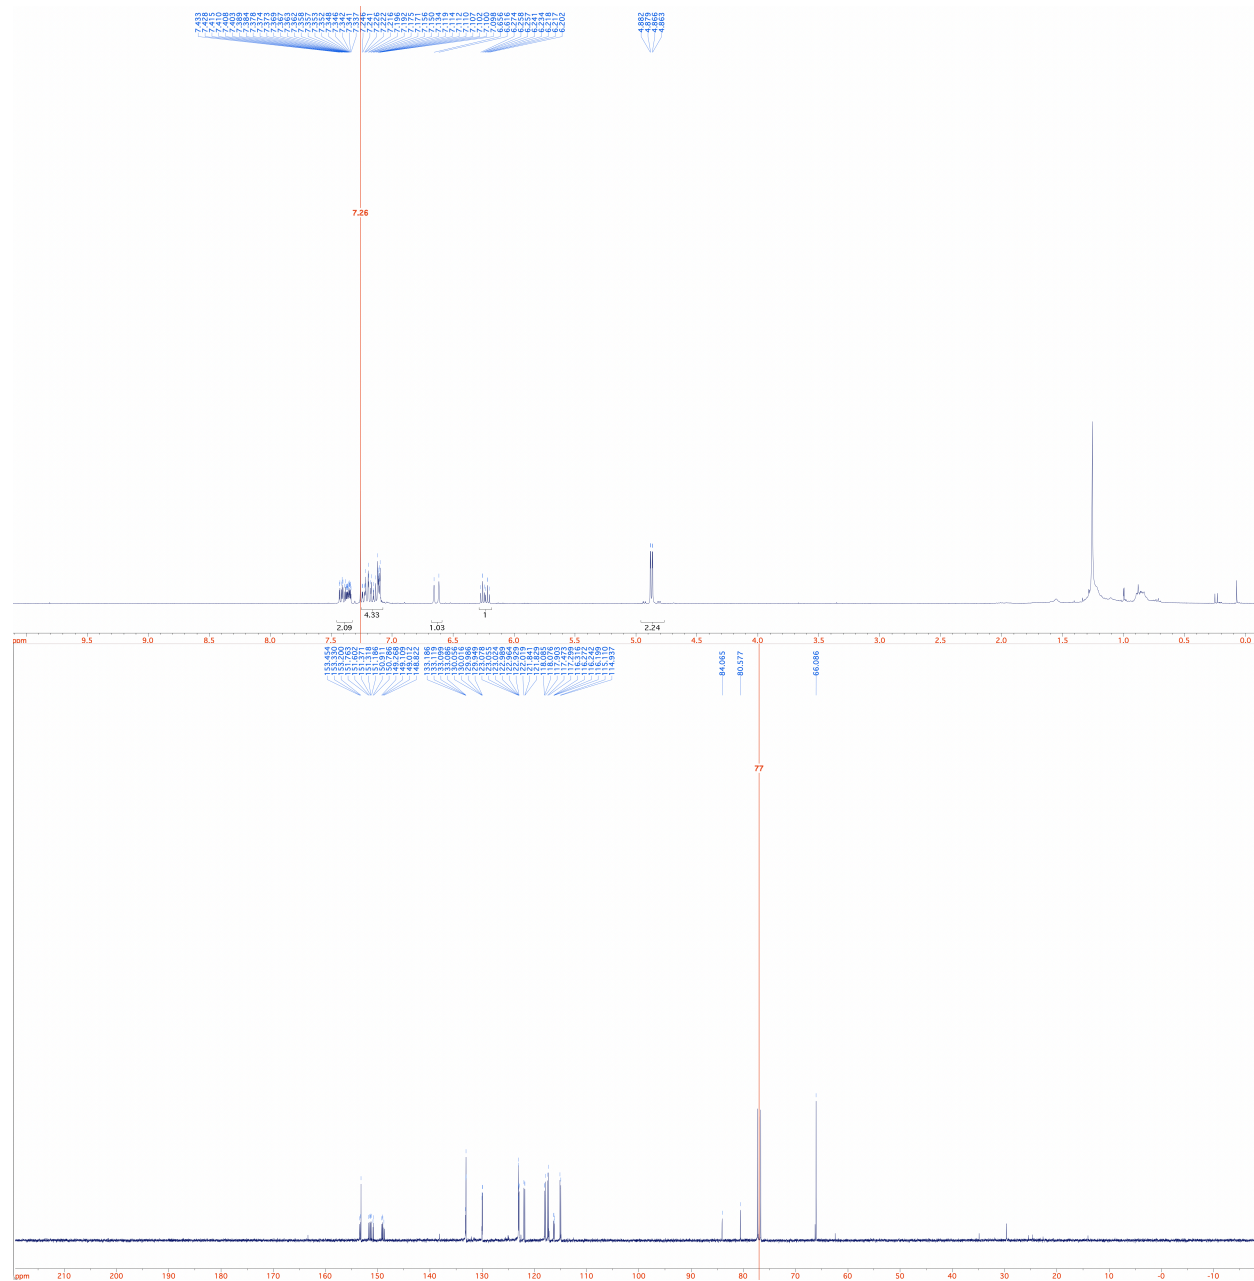

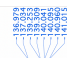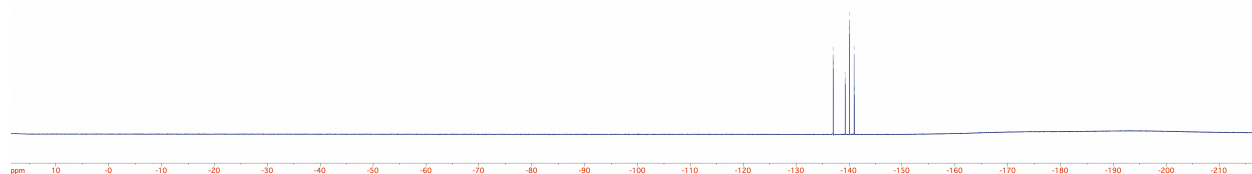

Background RT 0.75 - 1.01 (64 scans)  
SMK-2B4B4\_APCIpos\_inj3.datx 2021.12.07 18:41:32 ;  
APCI + Max: 2.8E6

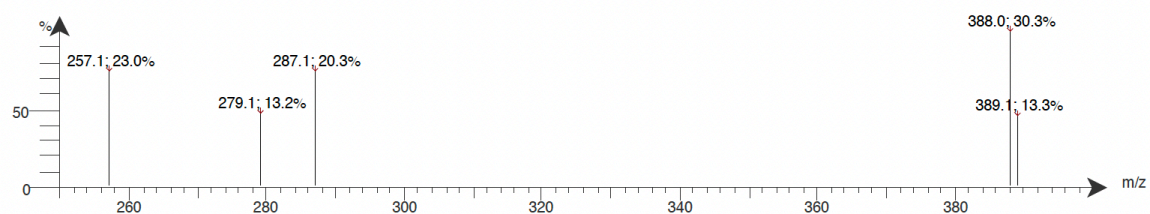

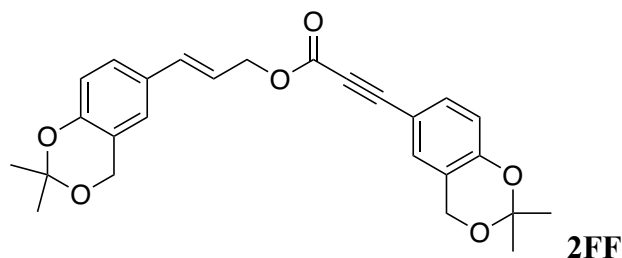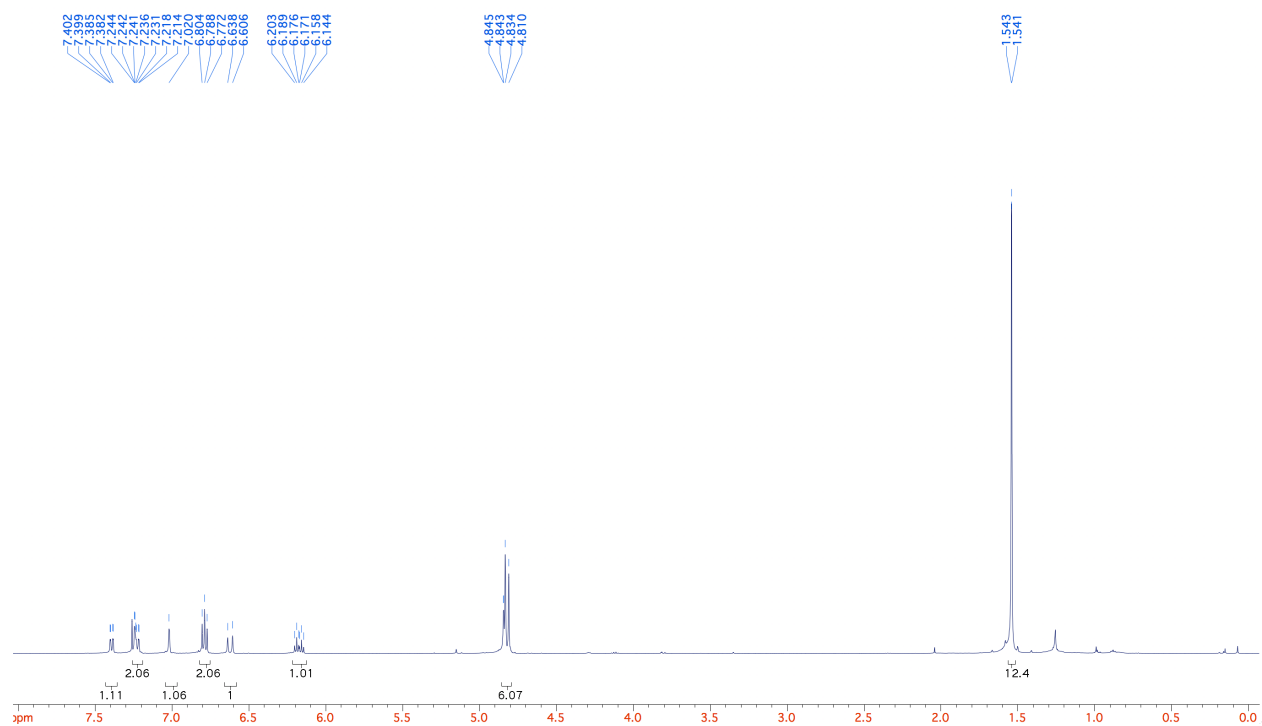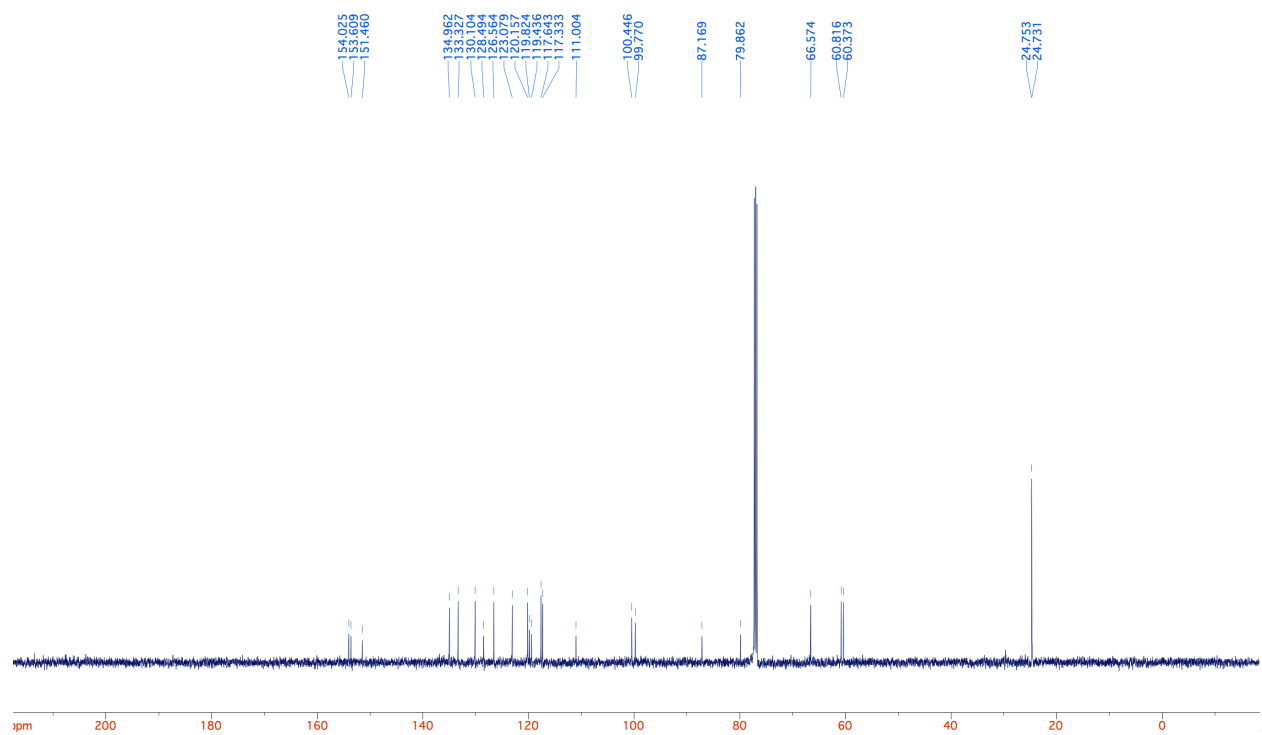

Intensity  
Background RT 0.90 - 1.03 (25 scans)  
SMK-T-88\_ESIpos\_inj1.datx 2021.12.09 11:20:47 ;  
ESI +

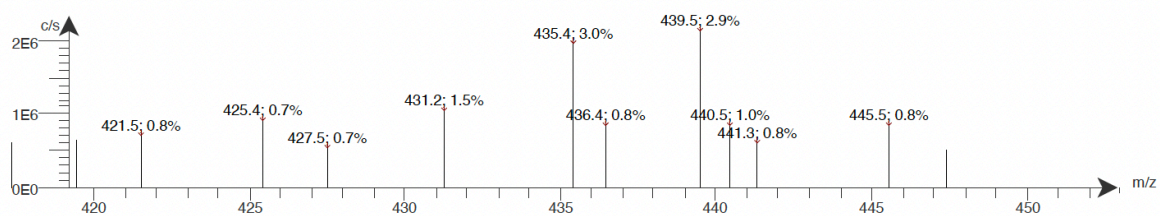

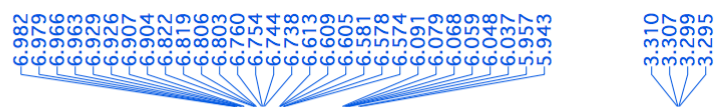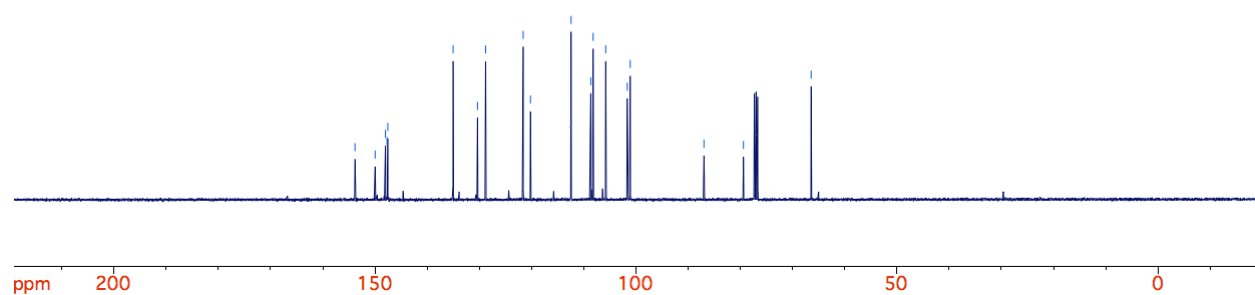

Background RT 1.07 - 1.32 {36 scans}  
OTB-C81p\_ESIpos\_inj2.datx 2021.12.09 14:21:13 ;  
ESI +

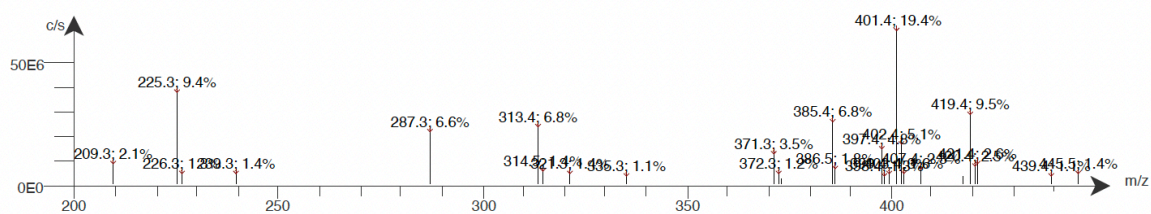

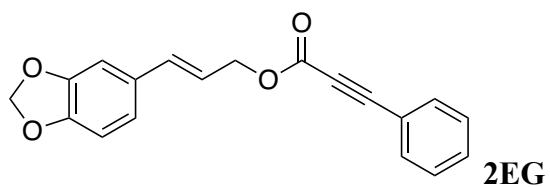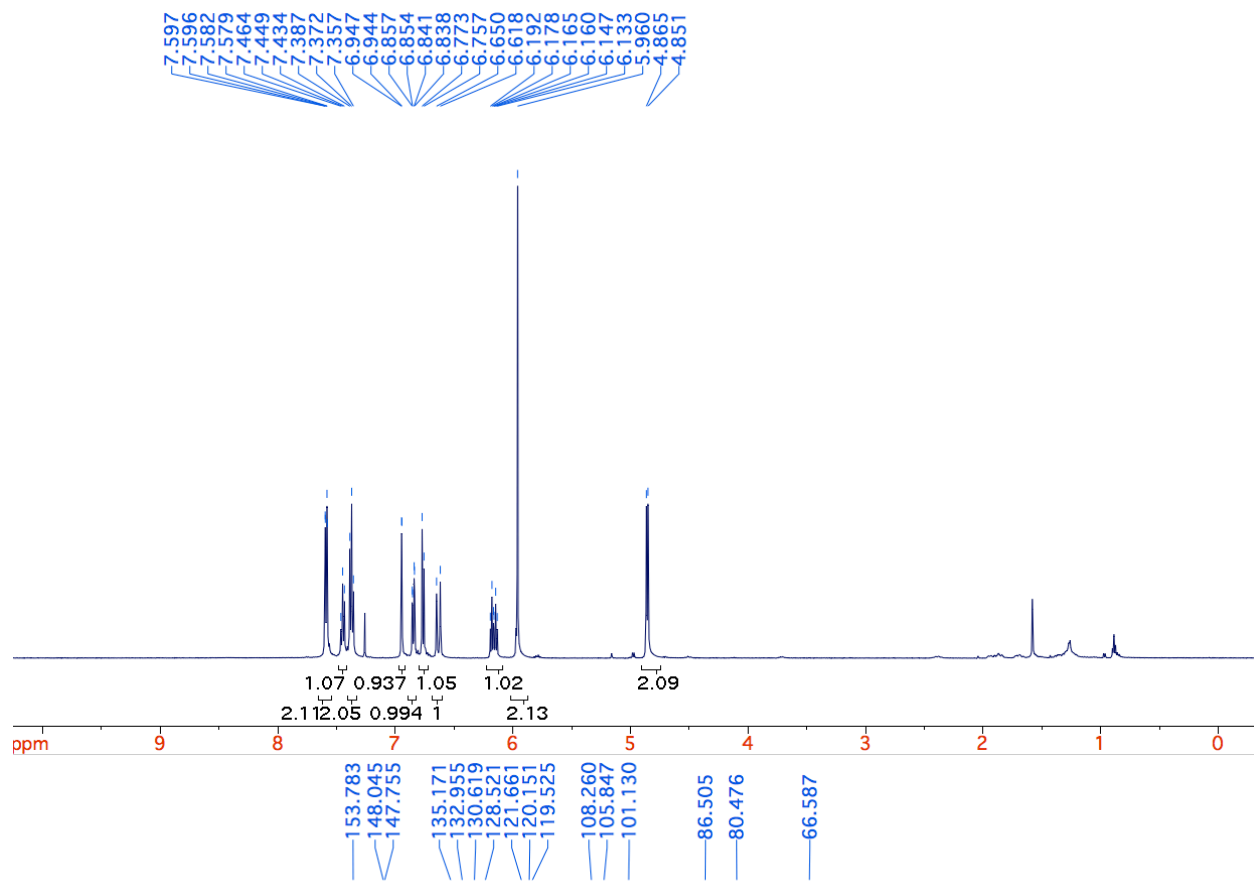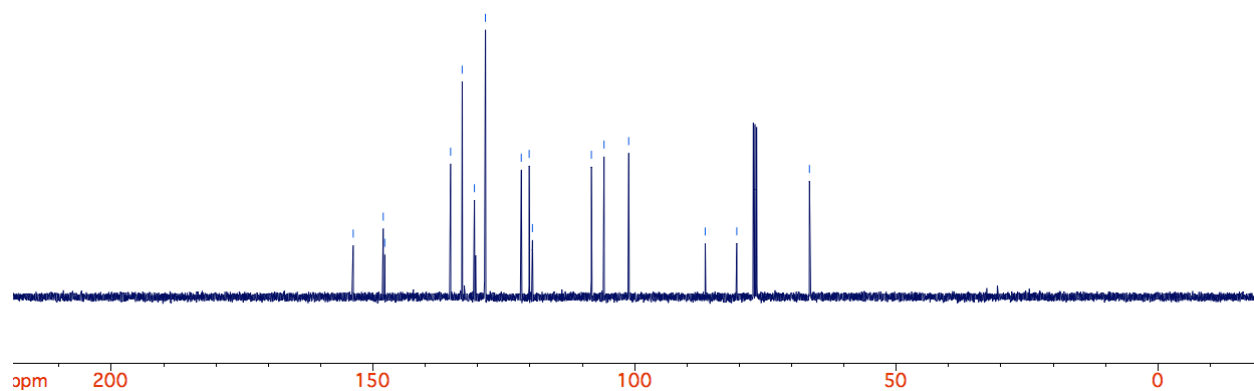

Background RT 1.07 - 1.28 (51 scans)  
ZTS-PDC-5\_ESIpos\_inj2.datx 2021.12.13 16:53:07 ;  
ESI + Max: 4.2E7

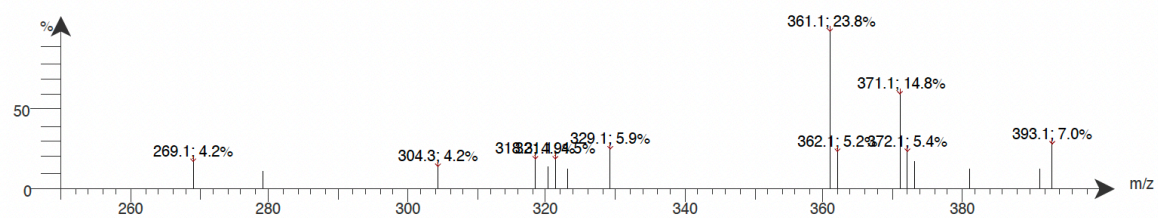

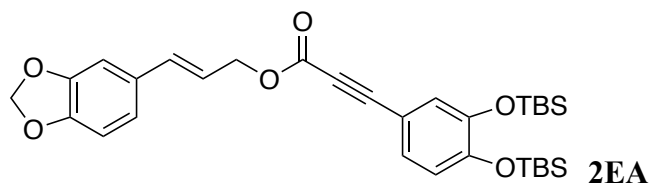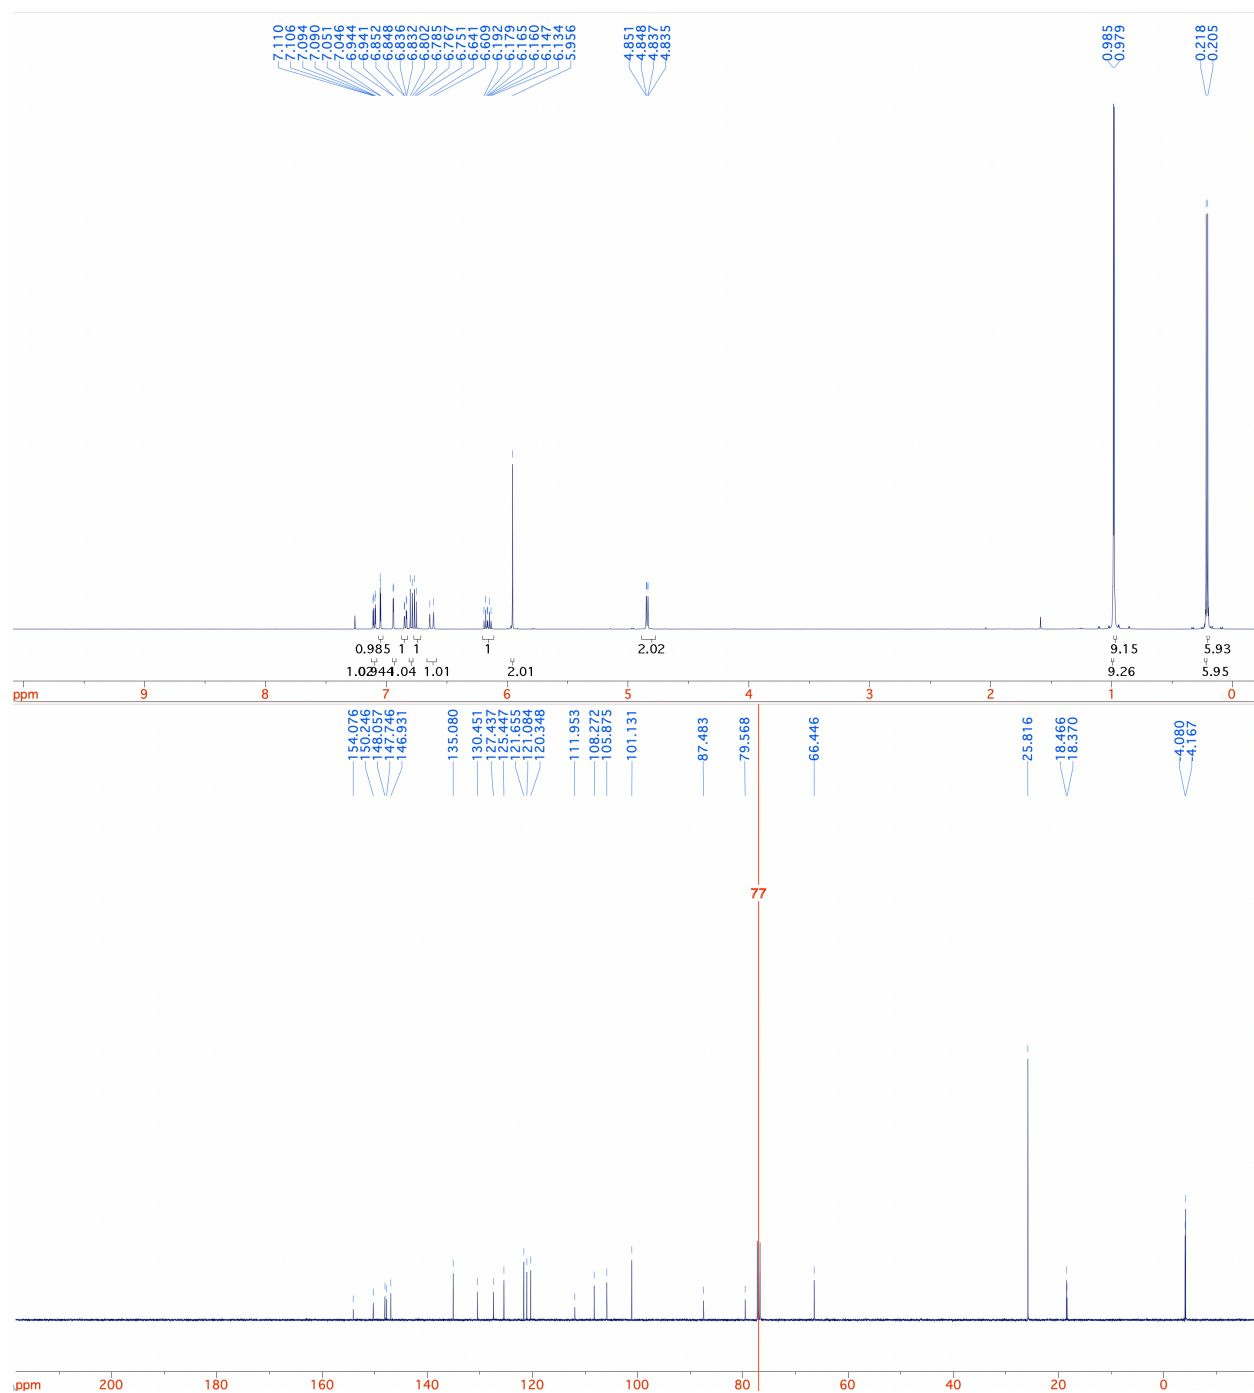

TIC  
SMK-T-58\_ESIpos\_inj2.datx 2021.12.09 10:27:08 ;  
Intensity ESI +

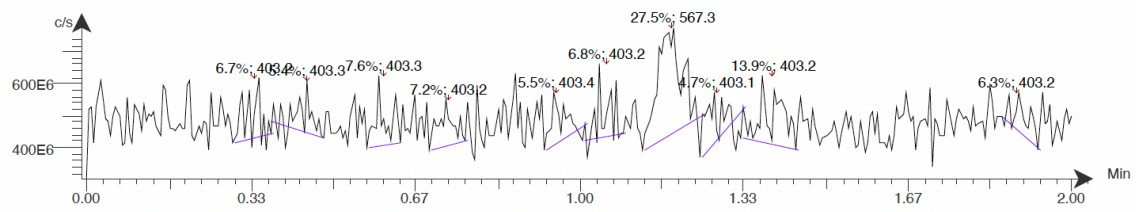

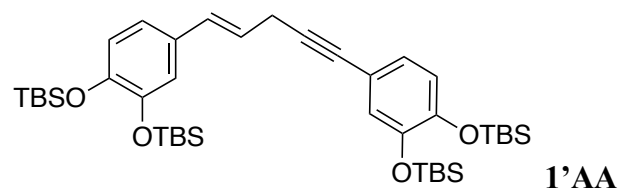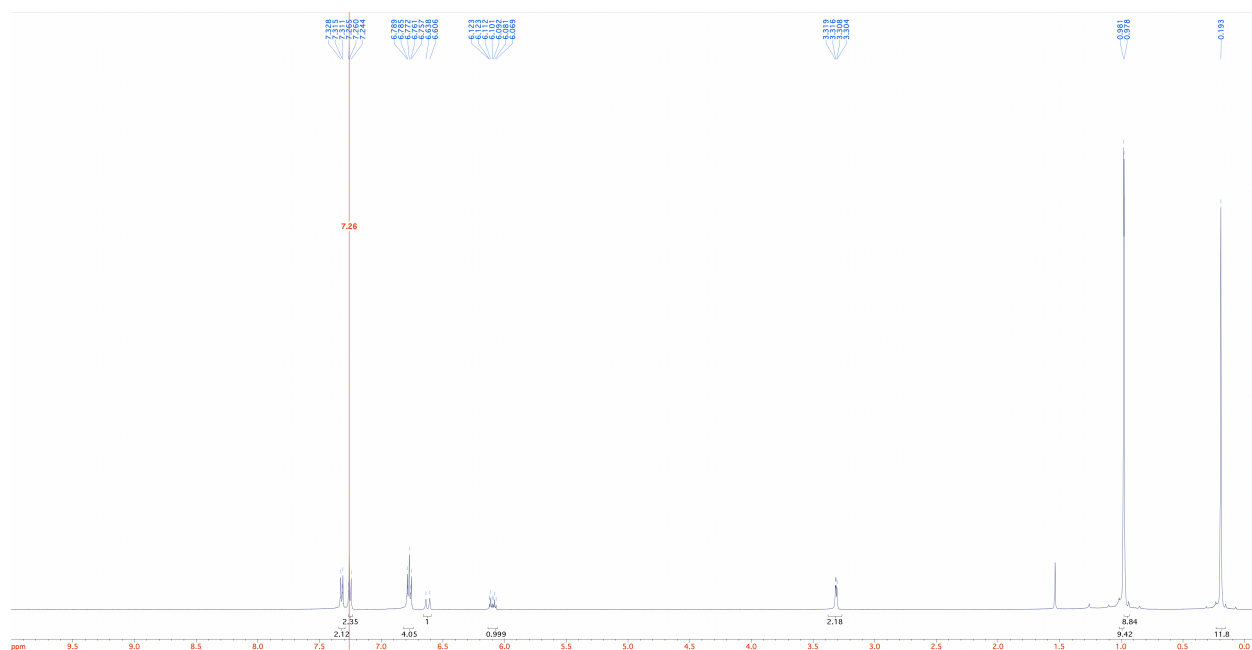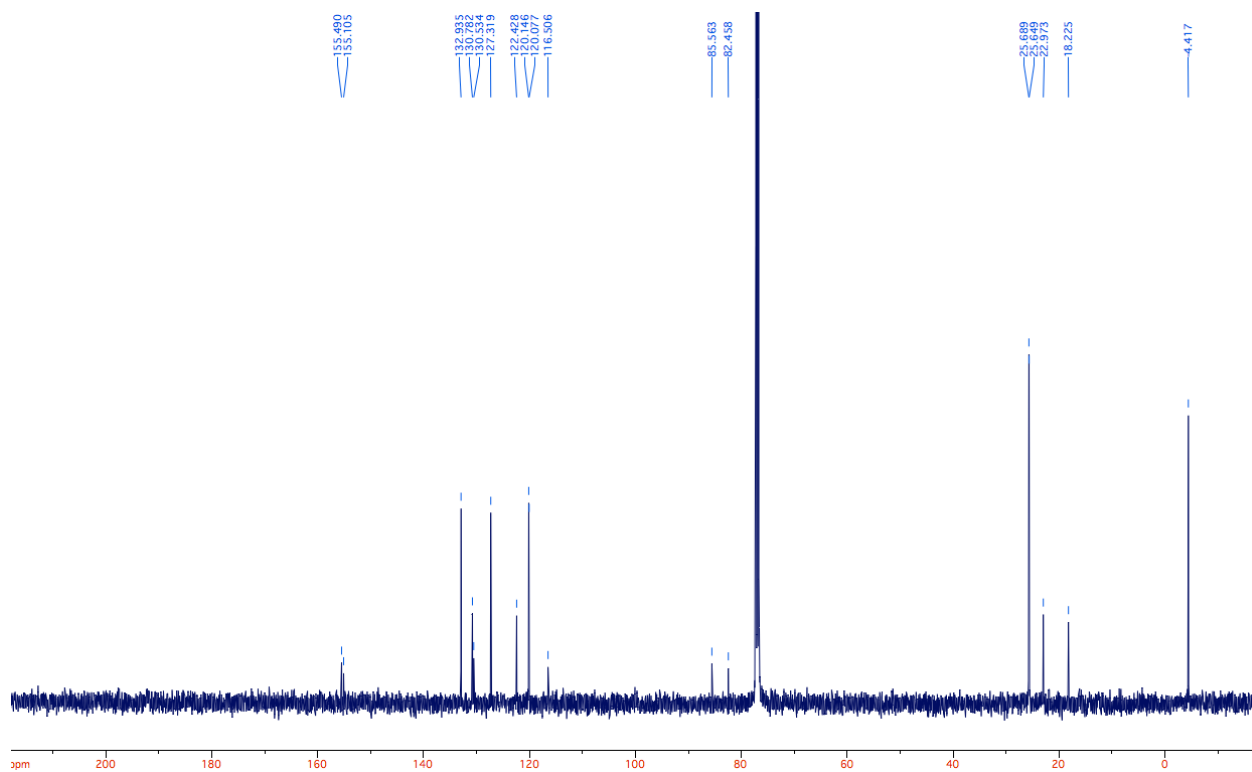

# User Spectra

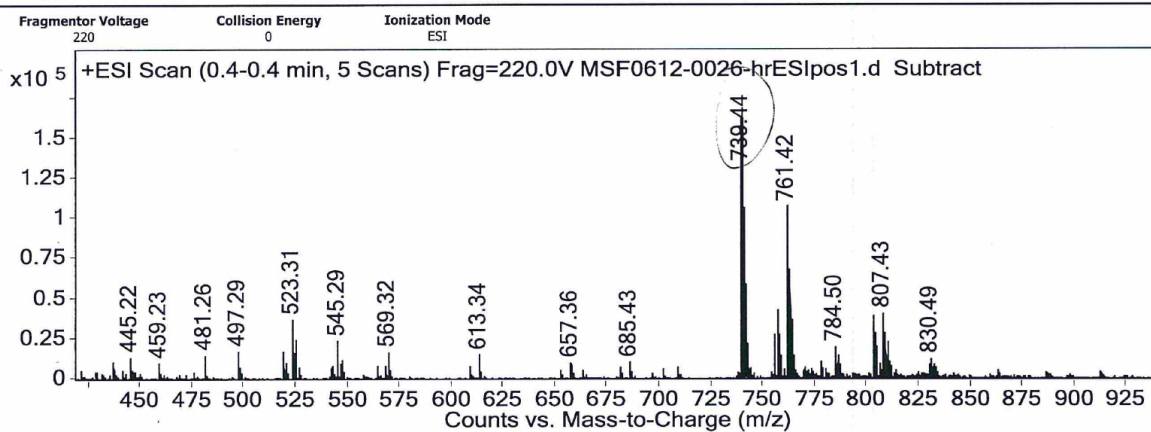

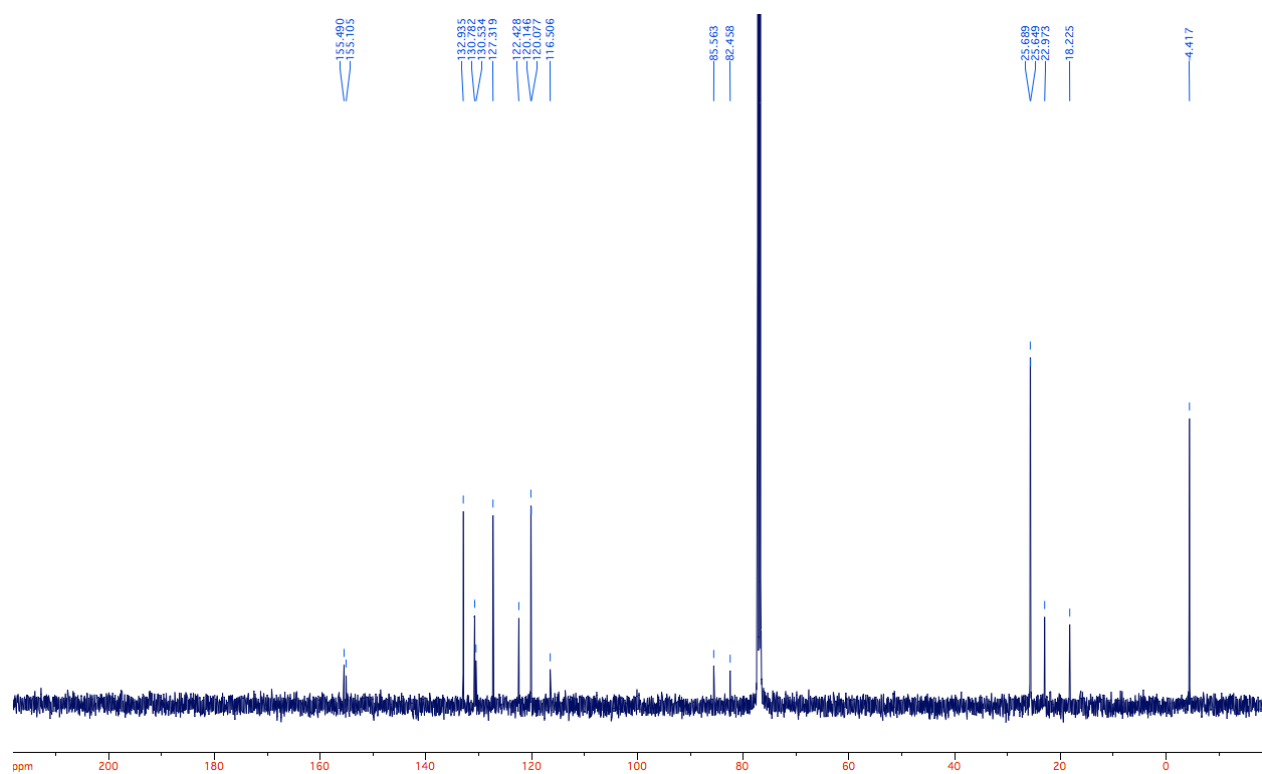

Background RT 0.90 - 1.09 (24 scans)  
SMK-T-81\_APCIpos\_inj1.datx 2021.12.07 18:08:47 ;  
APCI + Max: 4.5E7

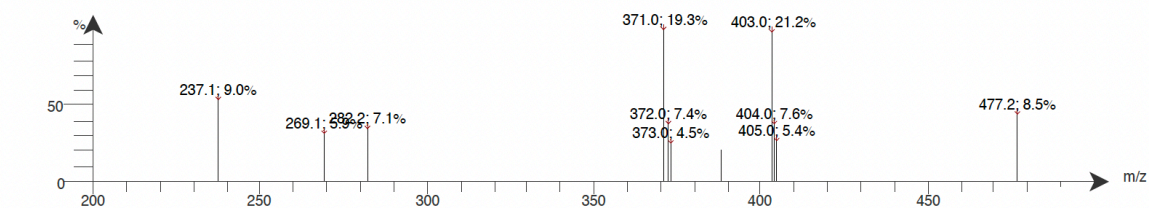

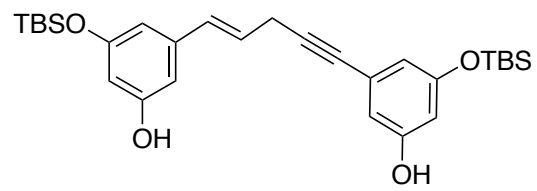

1'CC

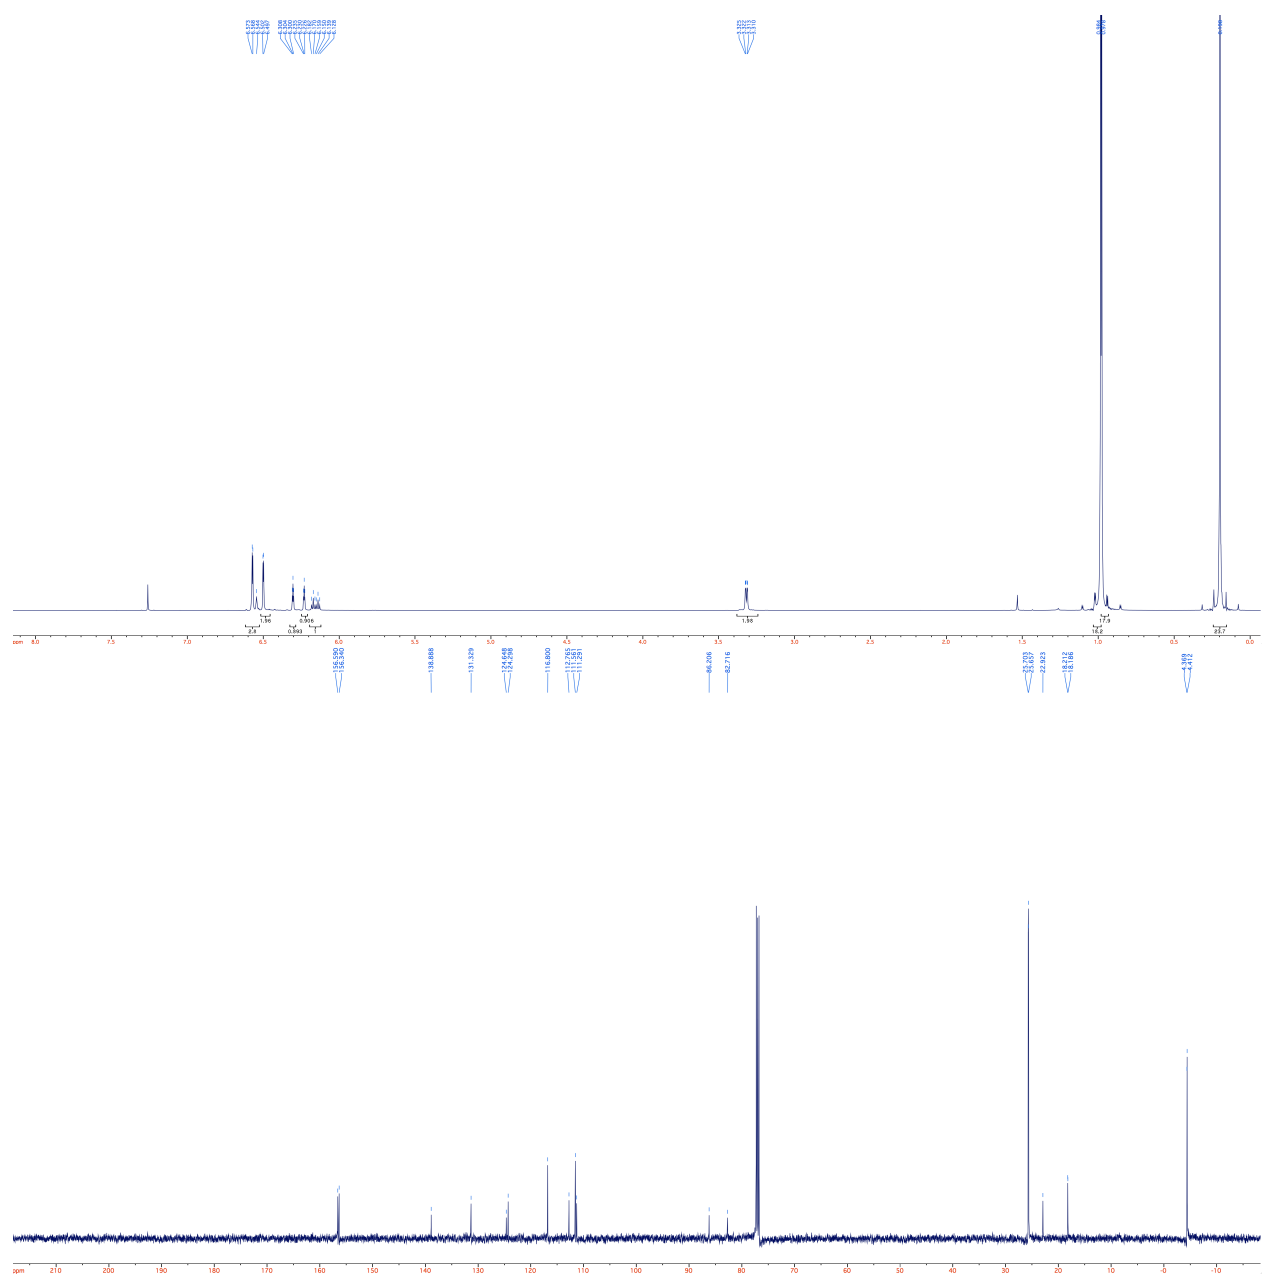

Background RT 1.12 - 1.28 {15 scans}  
SMK-T-83cc3\_3A4A4\_APCI\_inj1.datx 2021.11.30 14:21:32 ;  
Intensity APCI + Max: 2.7E7

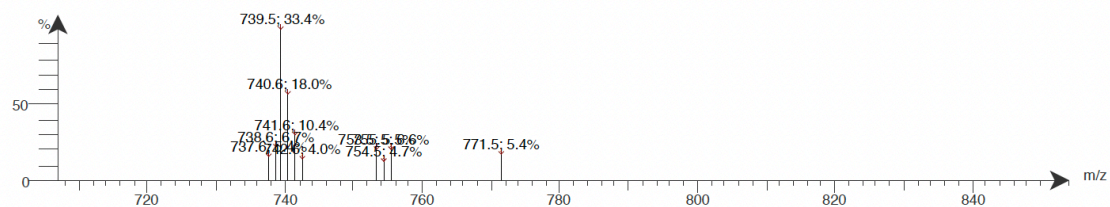

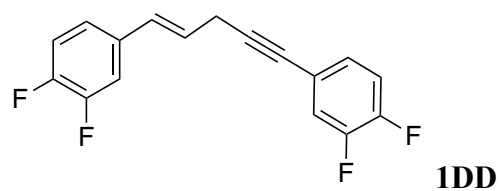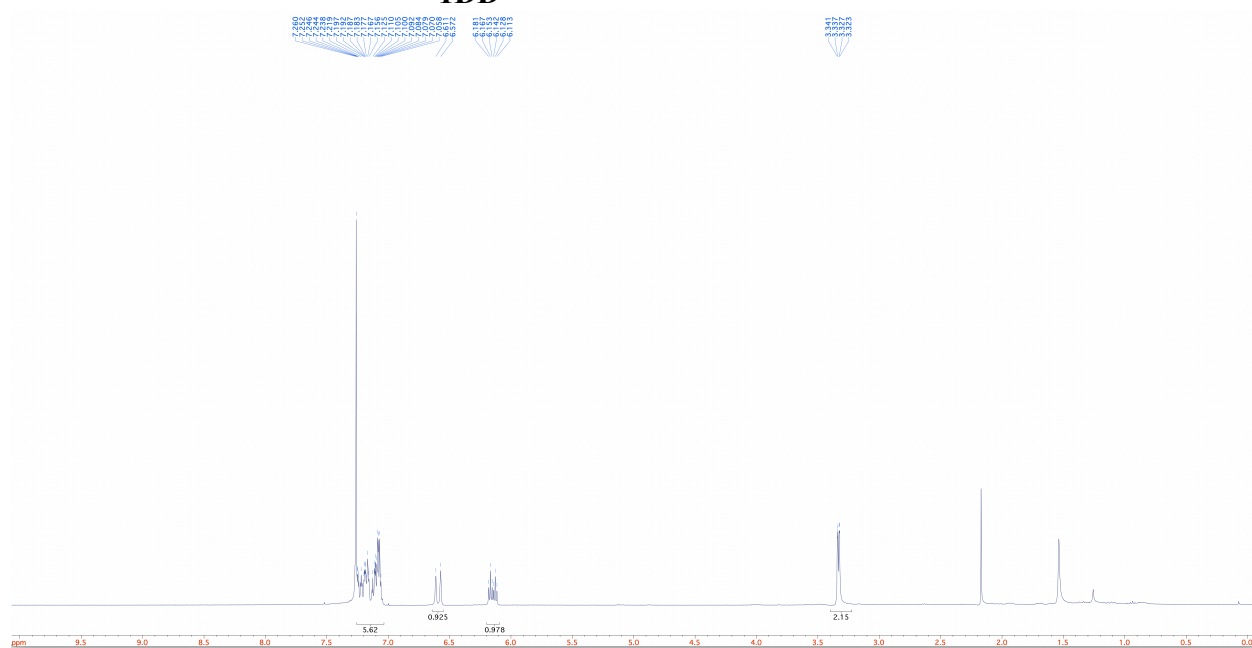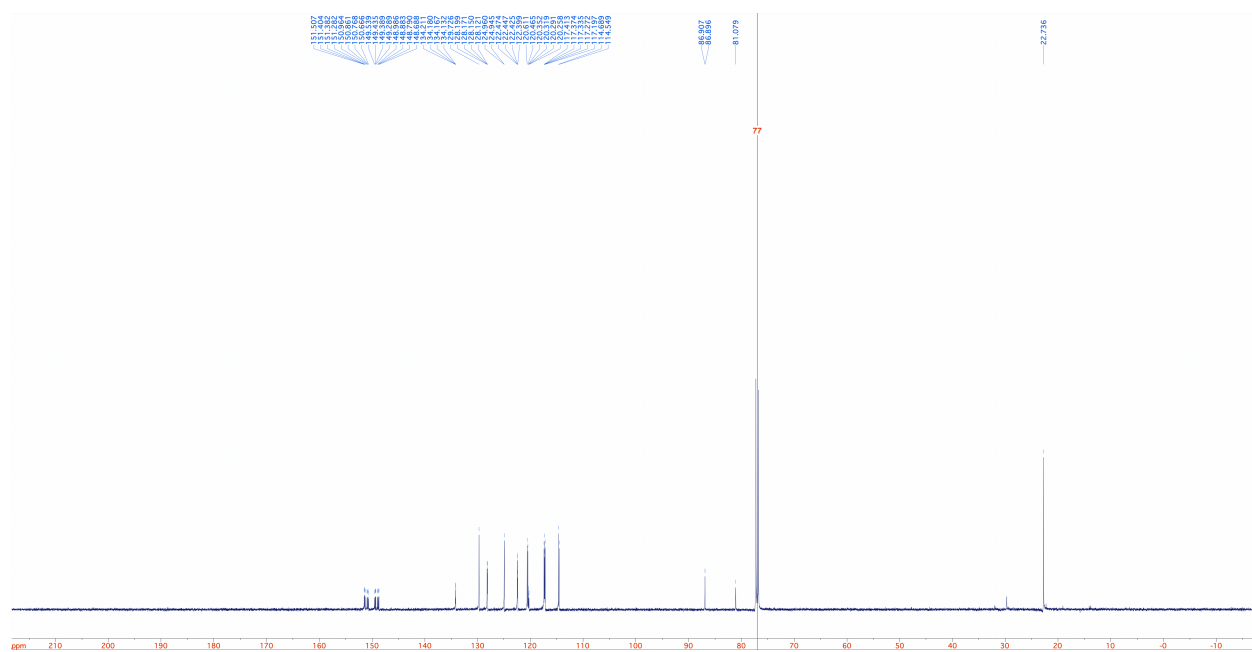

Background RT 1.56 - 1.73 {28 scans}  
SMK-ROPB4B4\_ESIpos\_inj2.dabx 2021.12.09 12:14:17 ;  
ESI +

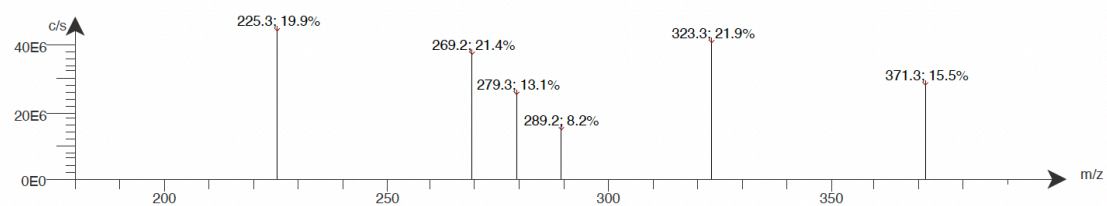

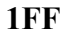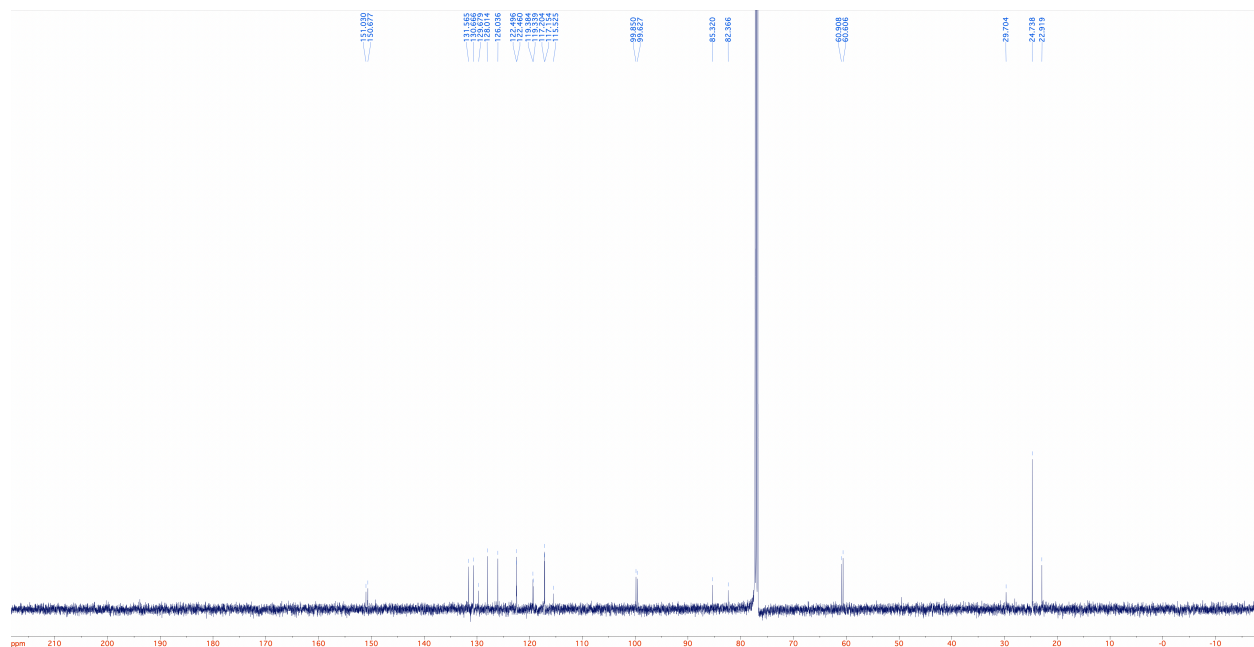

Background RT 0.93 - 1.16 (29 scans)  
SMK-T-93\_3C3C3\_APCI\_inj3.datx 2021.11.30 19:06:18 ;  
Intensity APCI + Max: 2.5E7

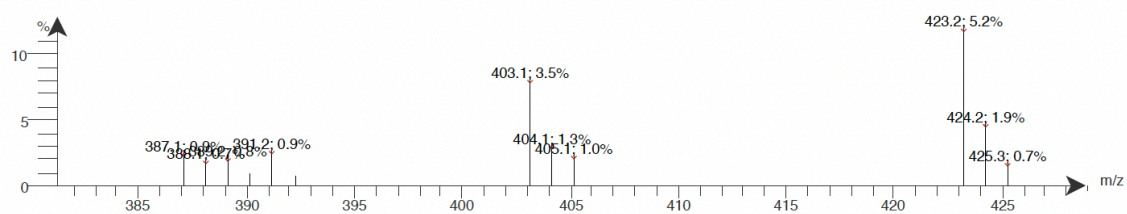

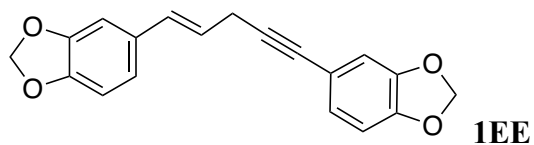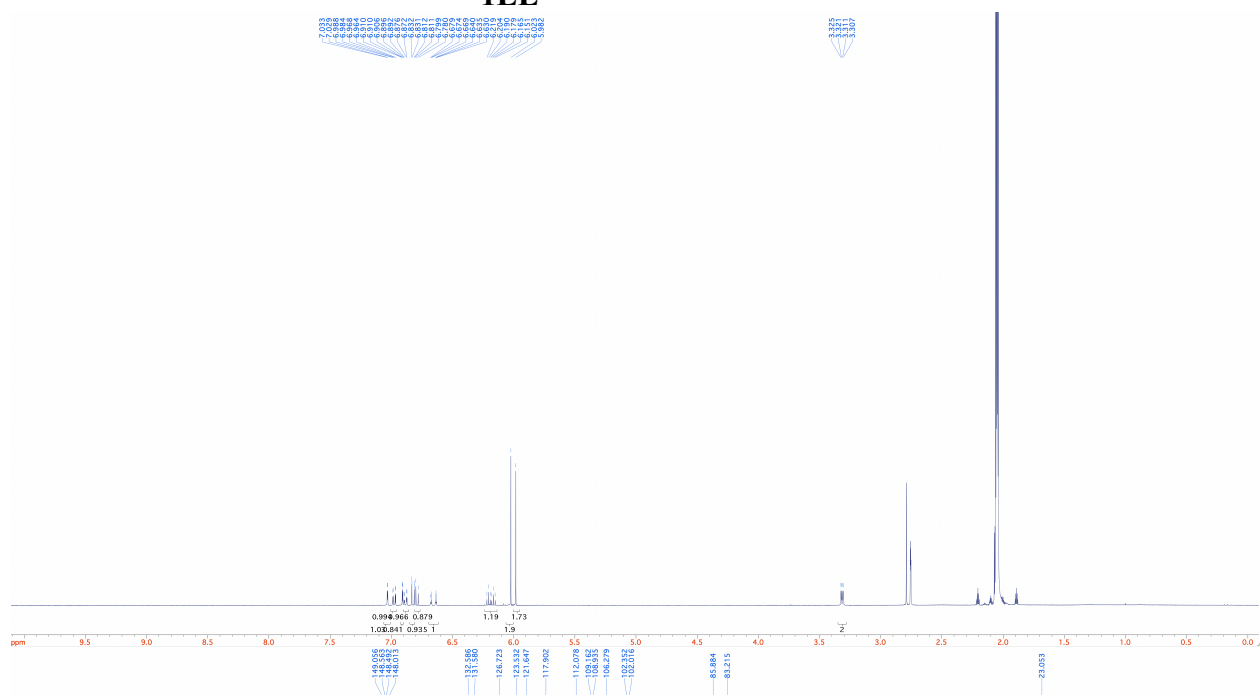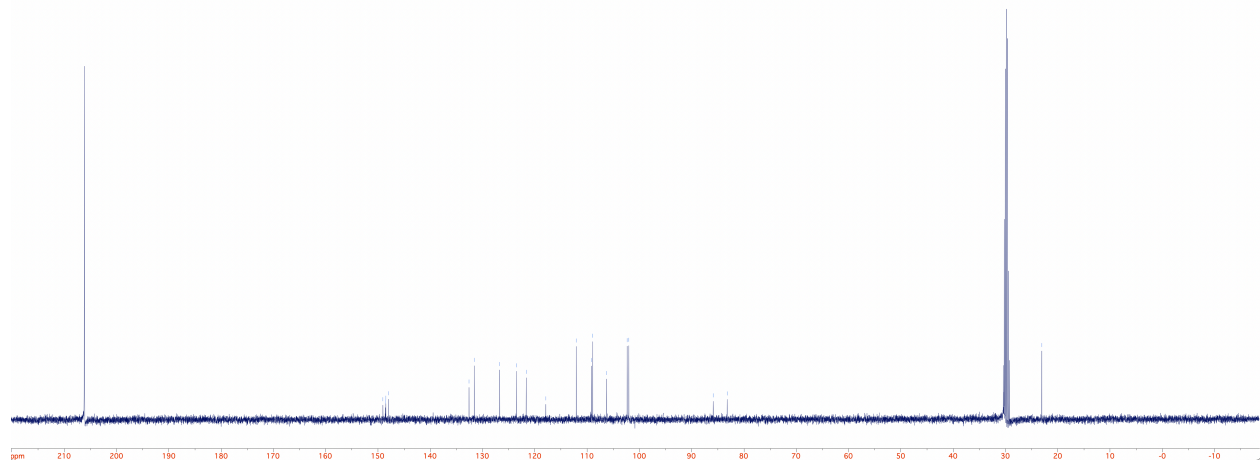

Background RT 1.09 - 1.24 (19 scans)  
 OTB-C-92\_APCipos\_inj1.datx 2021.12.07 18:03:18 ;  
 APCI + Max: 3.9E7

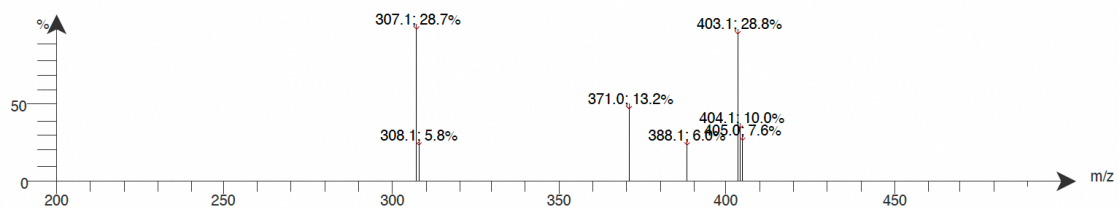

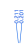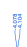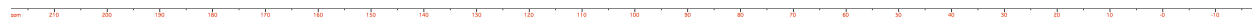

ESI + Max: 5.8E7

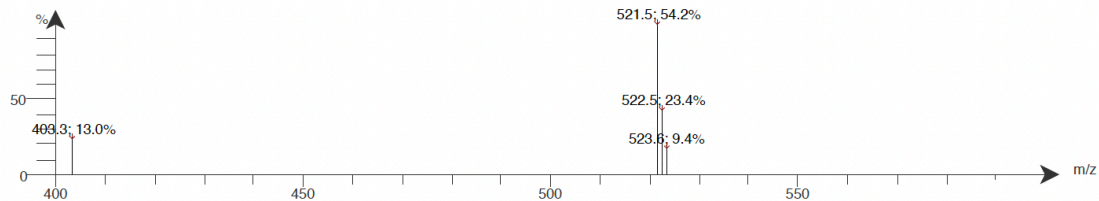

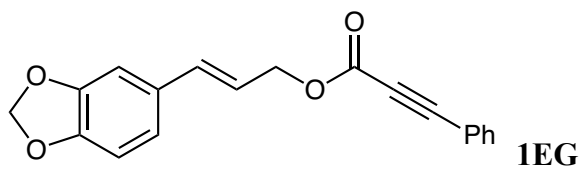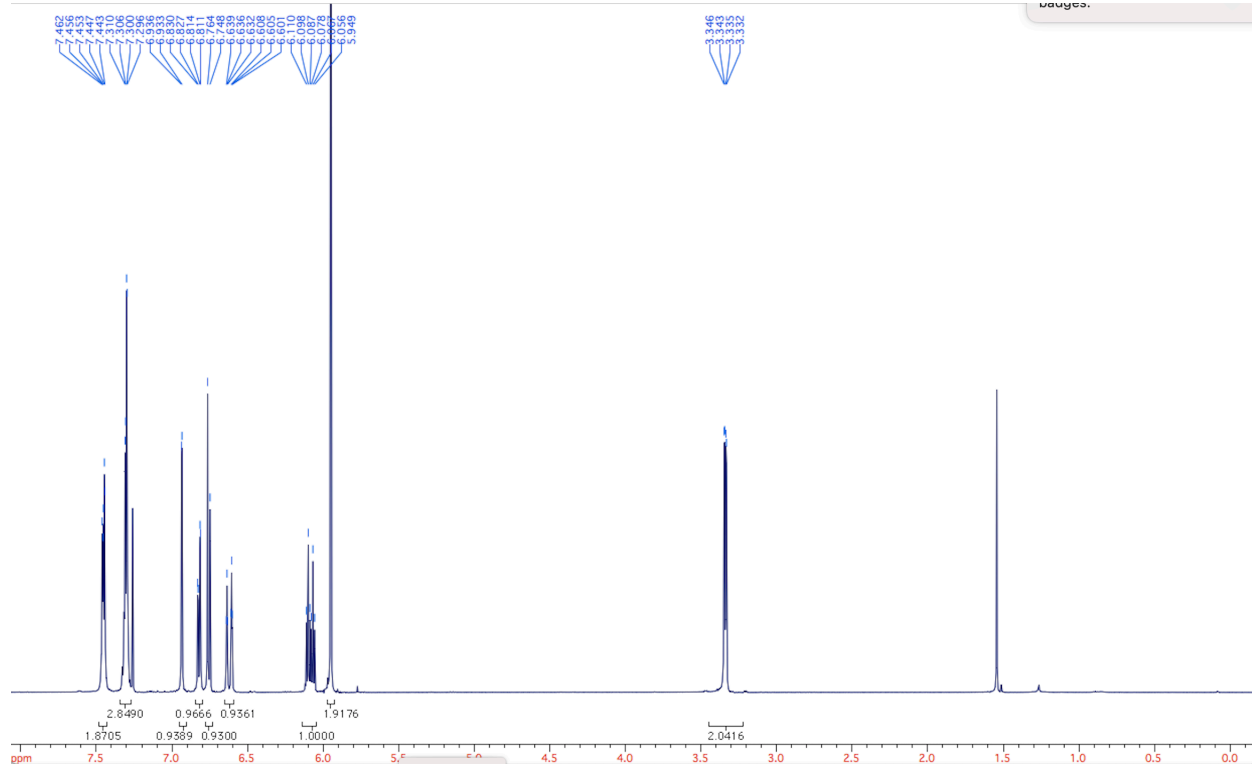

Background RT 1.06 - 1.26 (60 scans)  
ZTS-PDC-16\_ESIpos\_inj1.datx 2021.12.13 17:36:59 ;  
ESI + Max: 3.9E7

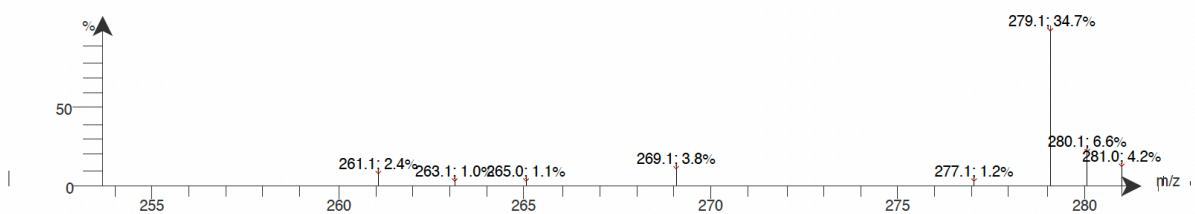

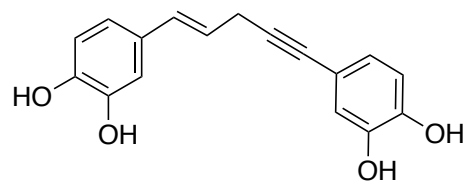

rooperol

1AA

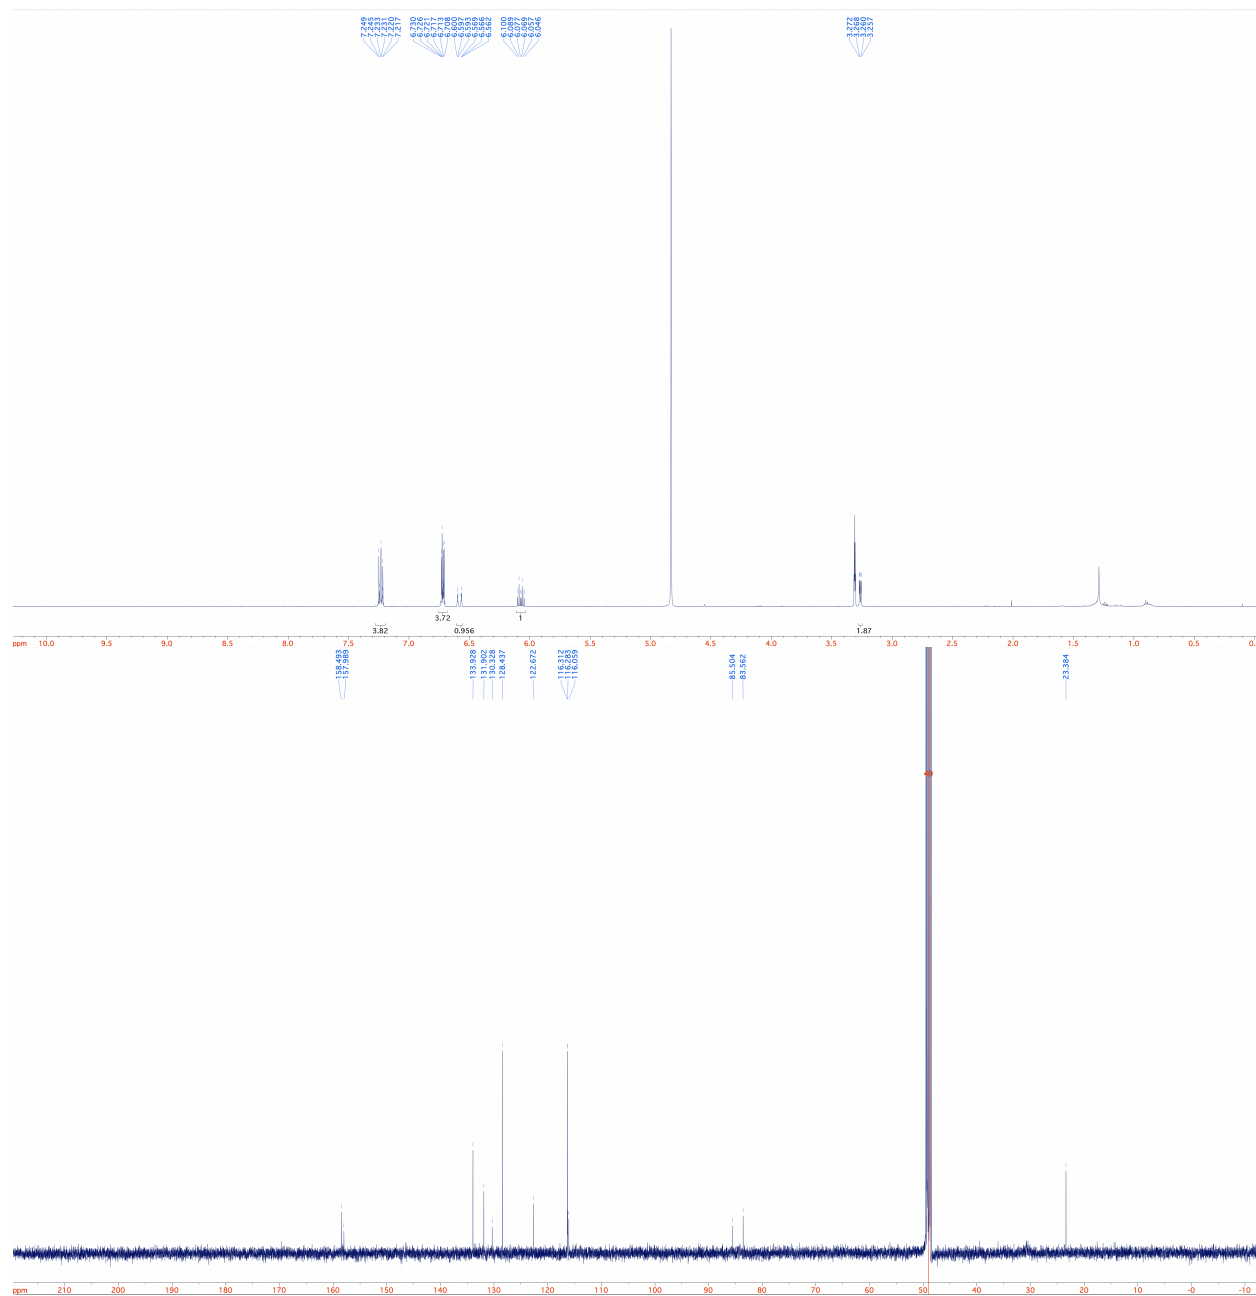

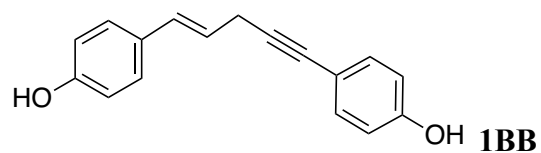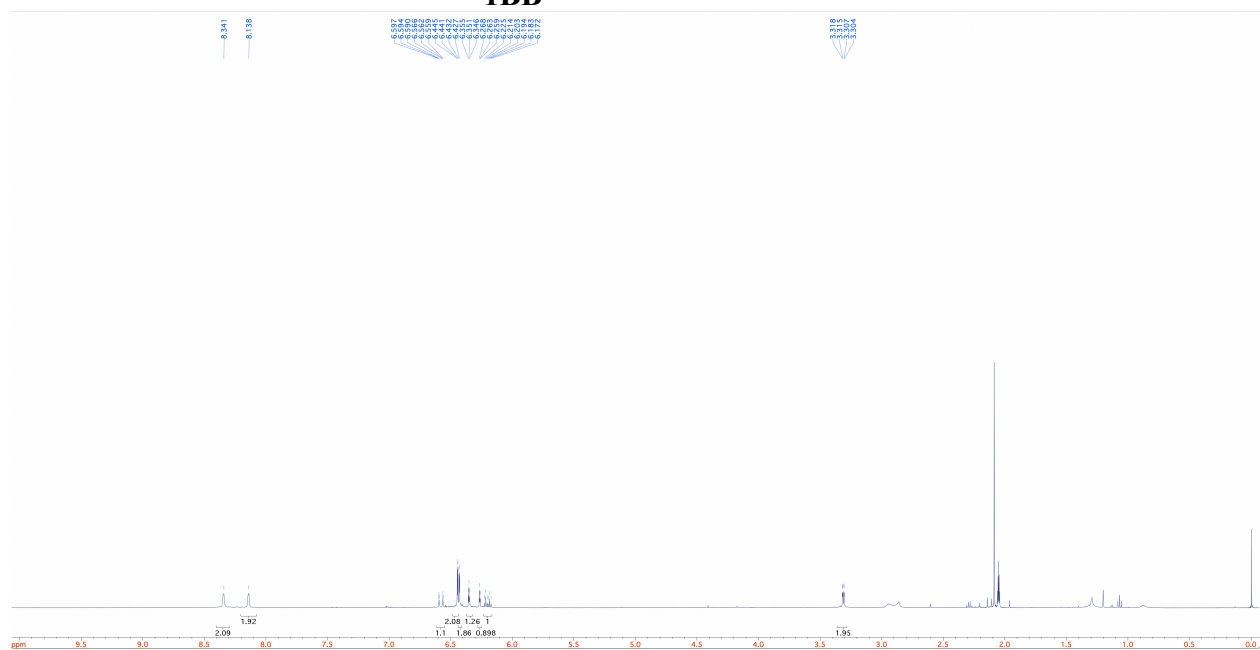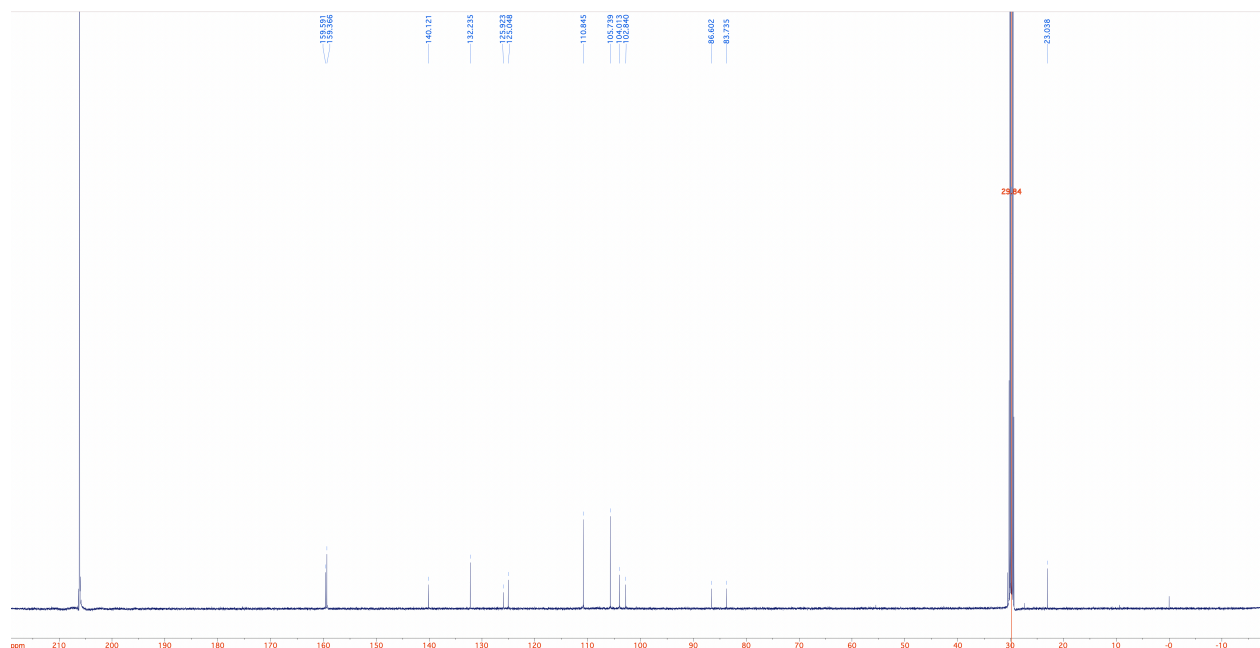

Spectrum RT 1.10 - 1.26 (35 scans) - Background Subtracted 1.09 - 1.10  
 SMK-T-101ESIneg\_inj4.datx 2021.12.13 16:19:35 ;  
 ESI - Max: 1.2E7

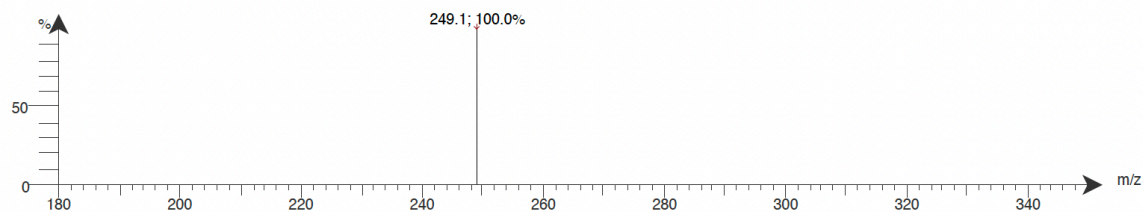

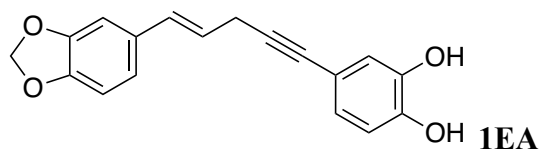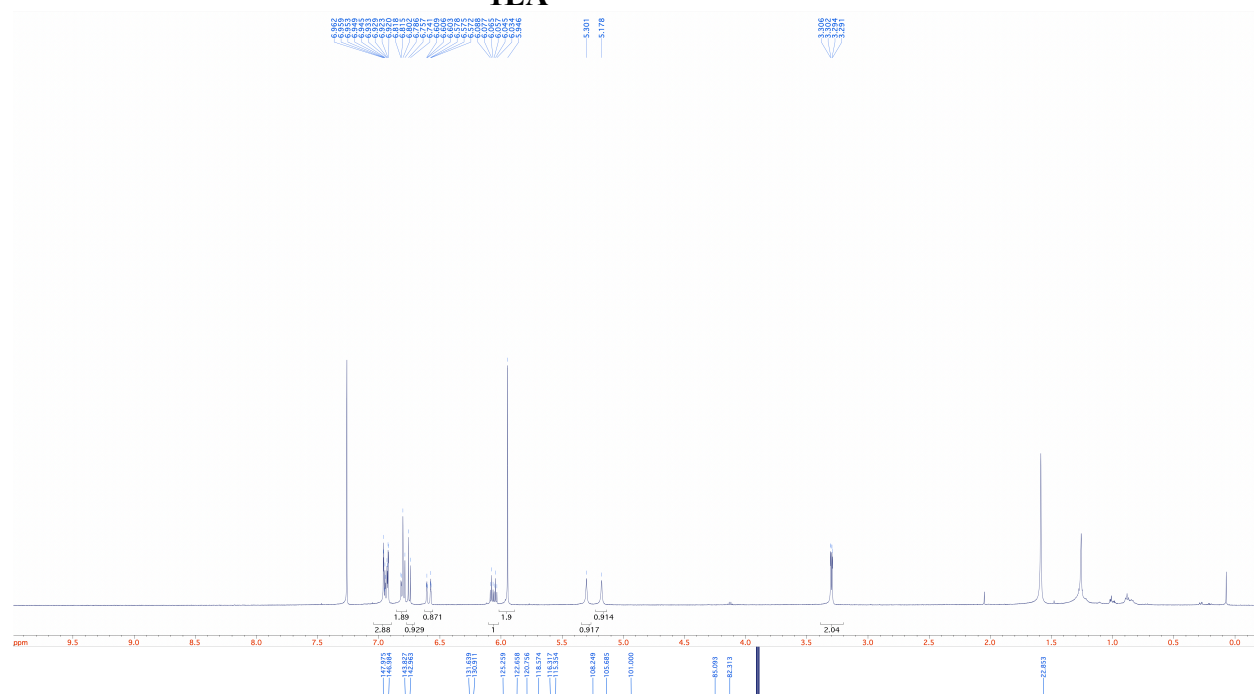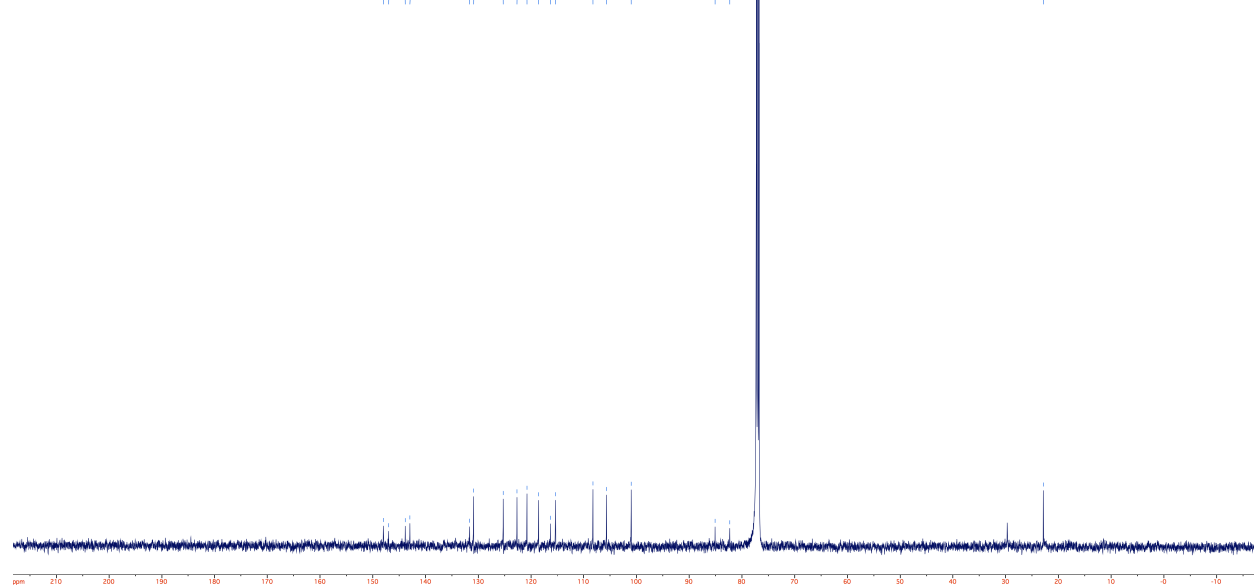

Background RT 0.83 - 1.03 {37 scans}  
 SMK-T-97cc1\_ESIpos\_inj1.datx 2021.12.09 10:52:42 ;  
 ESI + Max: 3.6E6

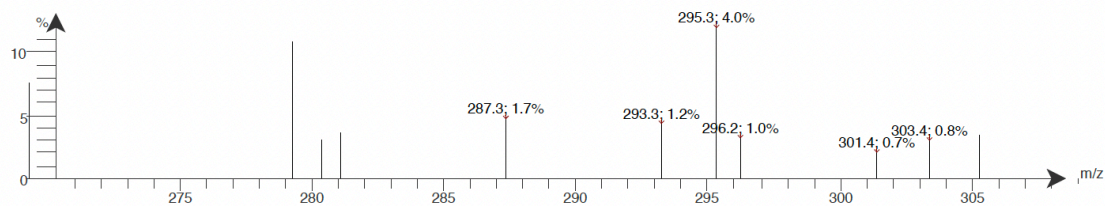

**Supplemental Figure 1. Dose-dependent cytotoxicity of rooperol and analogs in cancer cell lines.** Cells were treated with a serial of dilutions of each compound in three replicates in 96-well plates for 96 h, and cell viability was measured using MTT assay. Shown in each figure is dose-dependent response of the indicated cells to the indicated compound, with the dotted line signifying the  $IC_{50}$ .

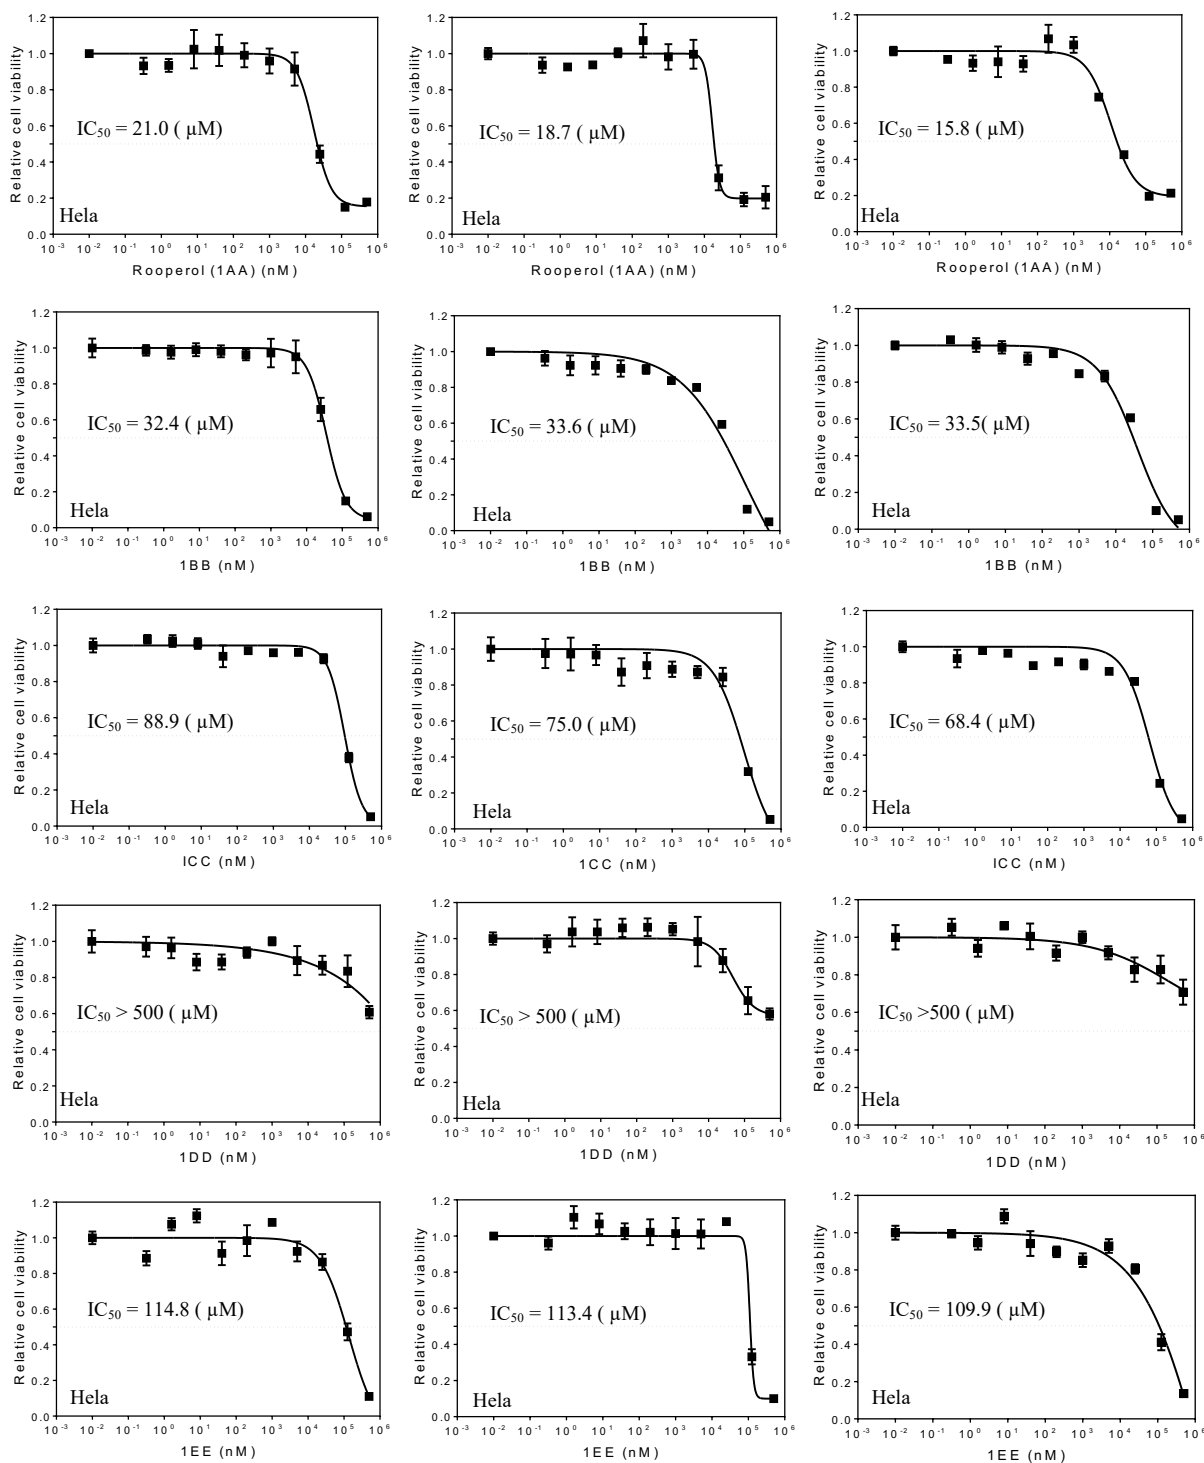

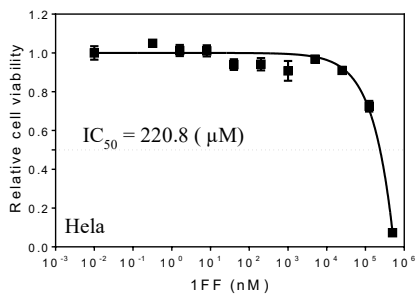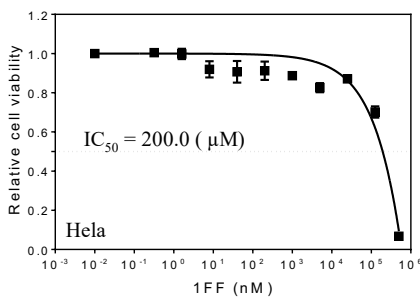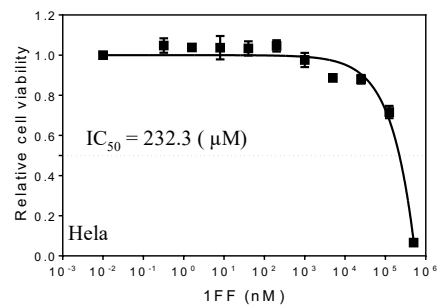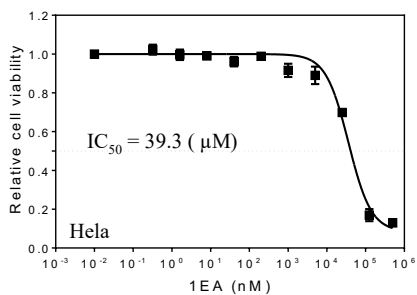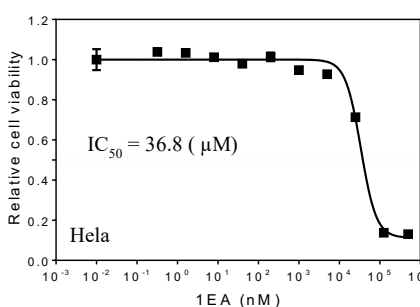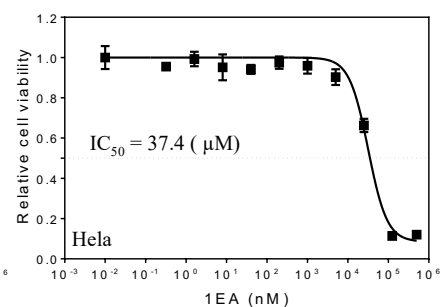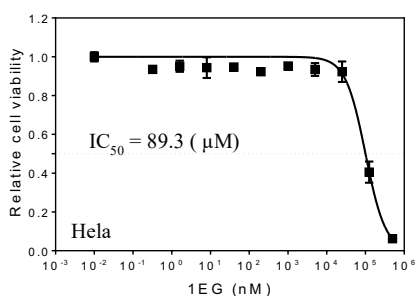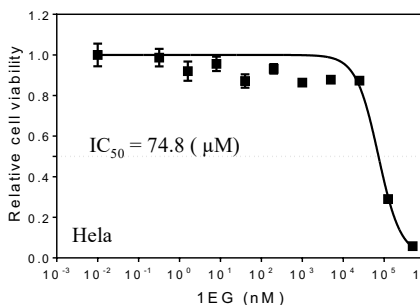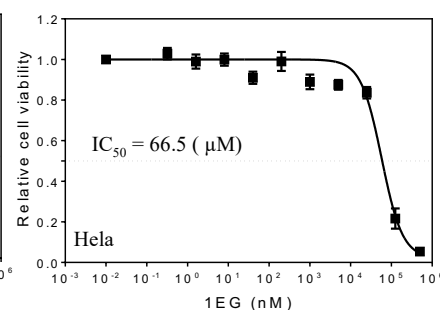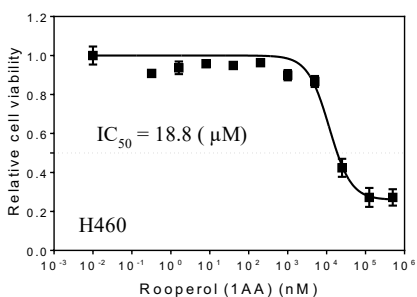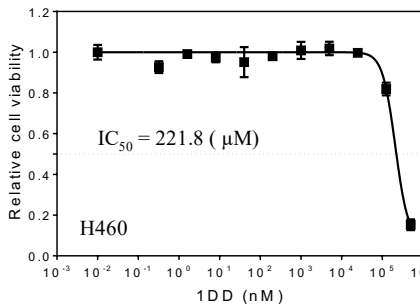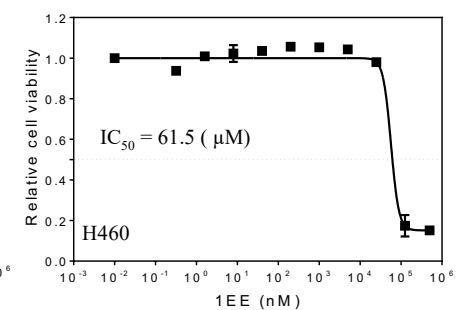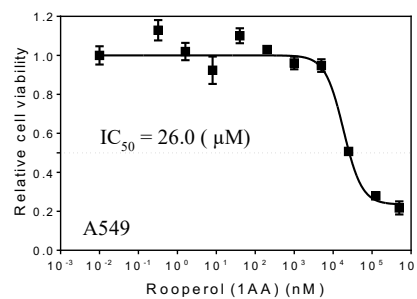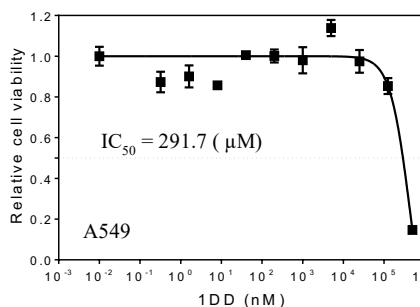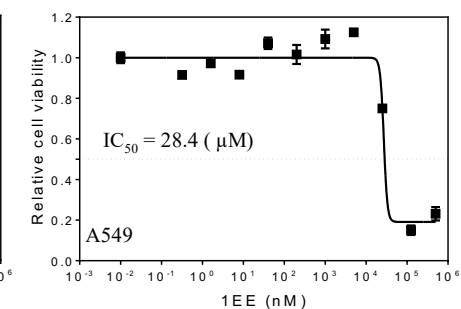

Supplement: s1 [file s1]
